# Supplementary material for: Ruthenium-catalyzed transformation of alkenyl triflates to alkenyl halides
Source: Royal Society of Chemistry journal article supplement (doi:10.1039/b907761h), 2009-01-01
Supplement: b907761h(2).pdf [file b907761h%282%29.pdf]

ima07001GPC

C:\Personal\imazaki\ima07001GPC.als

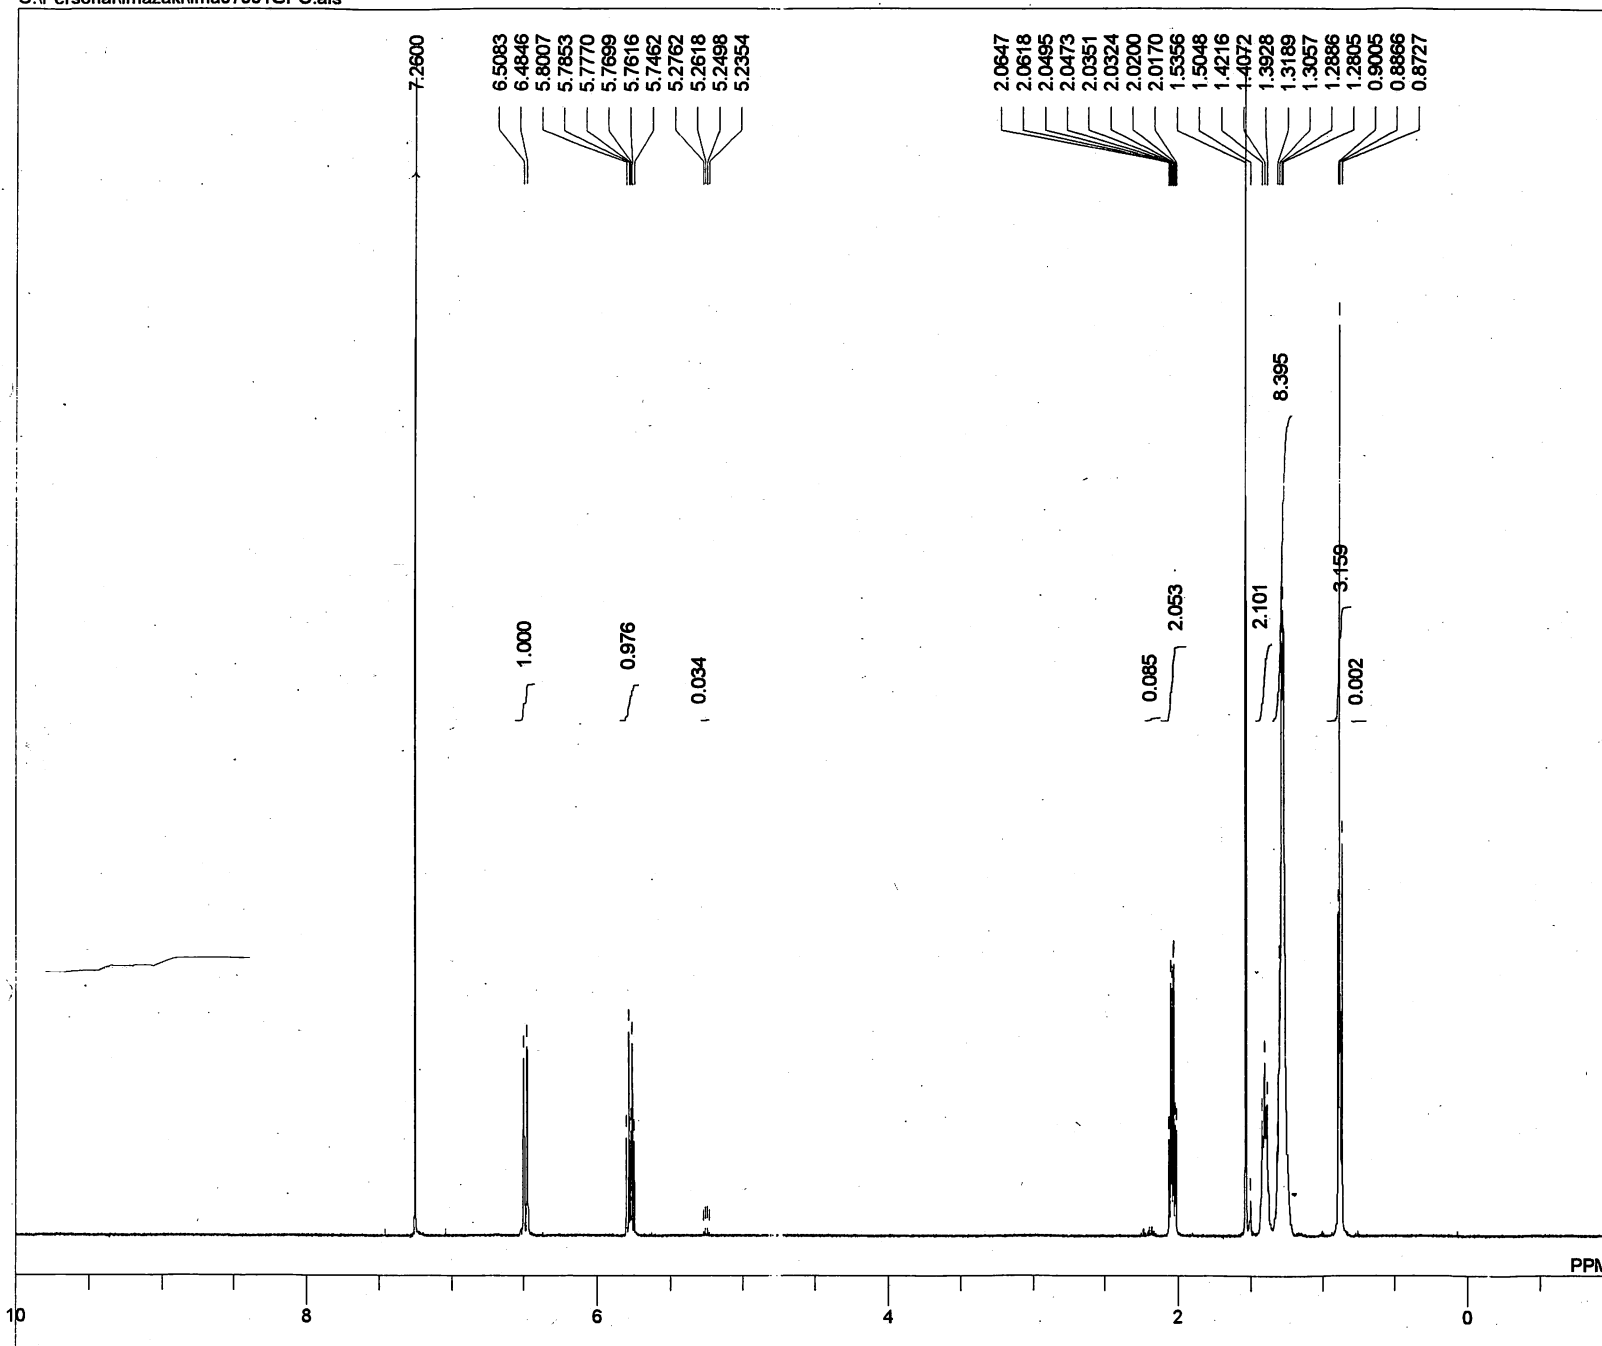

|       |                                               |
|-------|-----------------------------------------------|
| MENUF | 1H                                            |
| OBNUC | 1H                                            |
| OFR   | 499.10 MHz                                    |
| OBSET | 0.00 KHz                                      |
| OBFIN | 128885.00 Hz                                  |
| PW1   | 5.50 usec                                     |
| DEAQT | 72.30 usec                                    |
| PREBL | 0.01000 msec                                  |
| IWT   | 1000.0000 msec                                |
| POINT | 65536                                         |
| SPO   | 65536                                         |
| TIMES | 8                                             |
| DUMMY | 0                                             |
| FREQU | 8000.00 Hz                                    |
| FLT   | 4000 Hz                                       |
| DELAY | 50.00 usec                                    |
| ACQTM | 8.1920 sec                                    |
| PD    | 1.0000 sec                                    |
| ADBIT | 16                                            |
| RGAIN | 25                                            |
| BF    | 0.12 Hz                                       |
| T1    | 0.00                                          |
| T2    | 0.00                                          |
| T3    | 90.00                                         |
| T4    | 100.00                                        |
| EXMOD | non                                           |
| EXPCM | single pulse nondecoupling & nonpresaturation |
| IRNUC | 1H                                            |
| IFR   | 499.10 MHz                                    |
| IRSET | 0.00 KHz                                      |
| IRFIN | 128250.00 Hz                                  |
| IRRPW | 50 usec                                       |
| IRATN | 511                                           |
| DFILE | ima07001GPC.als                               |
| SF    | th5at                                         |
| LKSET | 0.00 KHz                                      |
| LKFIN | 26934.0 Hz                                    |
| LKLEV | 200                                           |
| LGAIN | 20                                            |
| LKPI  | 353                                           |
| LKSI  | 688                                           |
| CSPED | 12 Hz                                         |
| FILDC |                                               |
| FILDF |                                               |
| SLVNT | CDCL3                                         |
| DATIM | Tue Sep 16 17:20:13 2008                      |

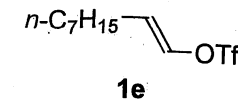

C:\Personal\imazaki\ima07001\_13C.als

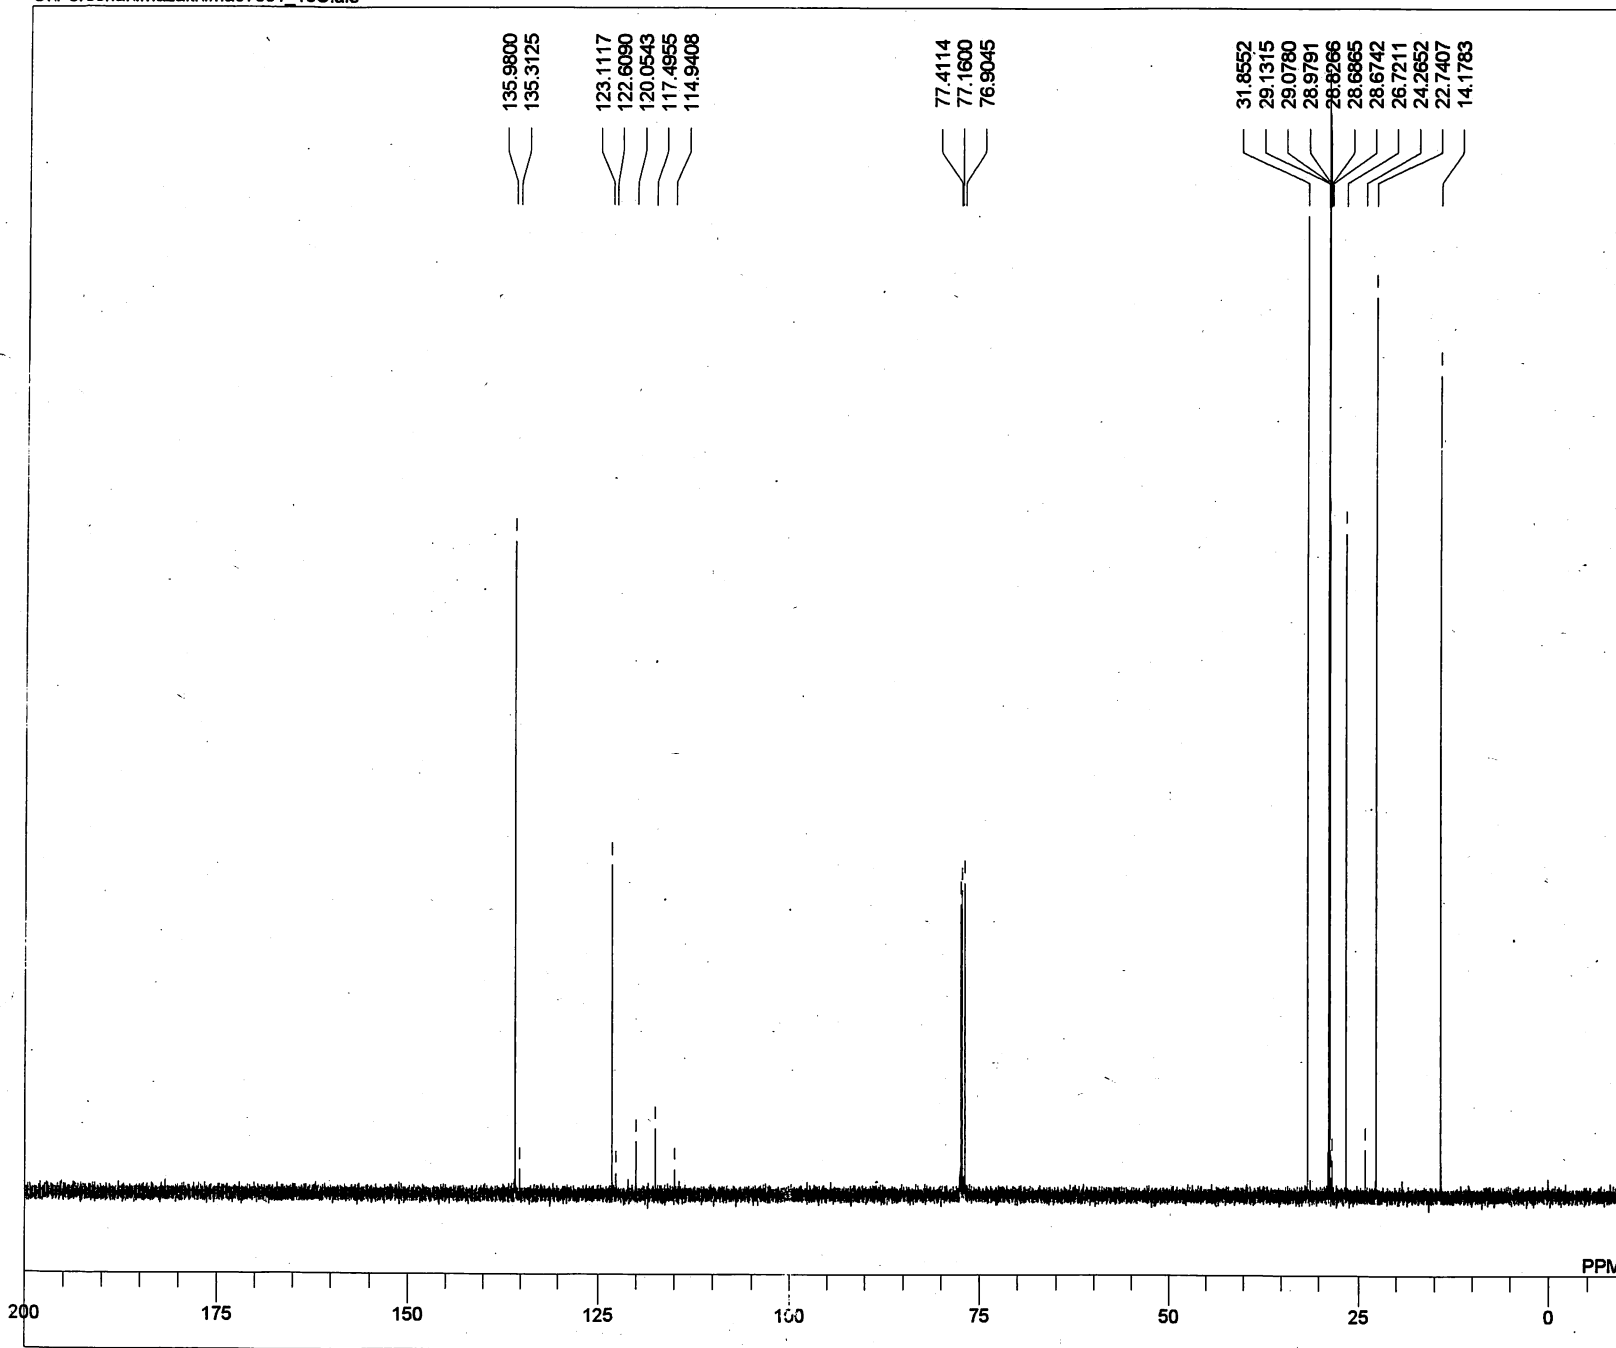

```

MENUF 13C
OBNUC 13C
OFR 125.40 MHz
OBSET 0.00 KHz
OBFIN 143041.00 Hz
PW1 6.25 usec
DEADT 10.00 usec
PREDL 0.01000 msec
IWT 1000.0000 msec
POINT 65536
SPO 65536
TIMES 512
DUMMY 2
FREQU 33898.30 Hz
FLT 16950 Hz
DELAY 11.80 usec
ACQTM 1.9333 sec
PD 1.0670 sec
ADBIT 16
RGAIN 30
BF 0.12 Hz
T1 0.00
T2 0.00
T3 90.00
T4 100.00
EXMOD bcm
EXPCM single pulse with bilevel decoupling
IRNUC 1H
IFR 499.10 MHz
IRSET 0.00 KHz
IRFIN 128250.00 Hz
IRRPW 50 usec
IRATN 511
DFILE ima07001_13C.als
SF th5at
LKSET 0.00 KHz
LKFIN 26934.0 Hz
LKLEV 200
LGA 19
LKPHS 353
LKSIG 601
CSPED 10 Hz
FILDC
FILDF
SLVNT CDCL3
DATIM Fri Dec 05 10:06:57 2008
    
```

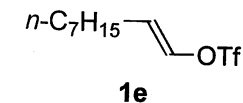

C:\WinLambda\COMMON\DEFAULT.ALS

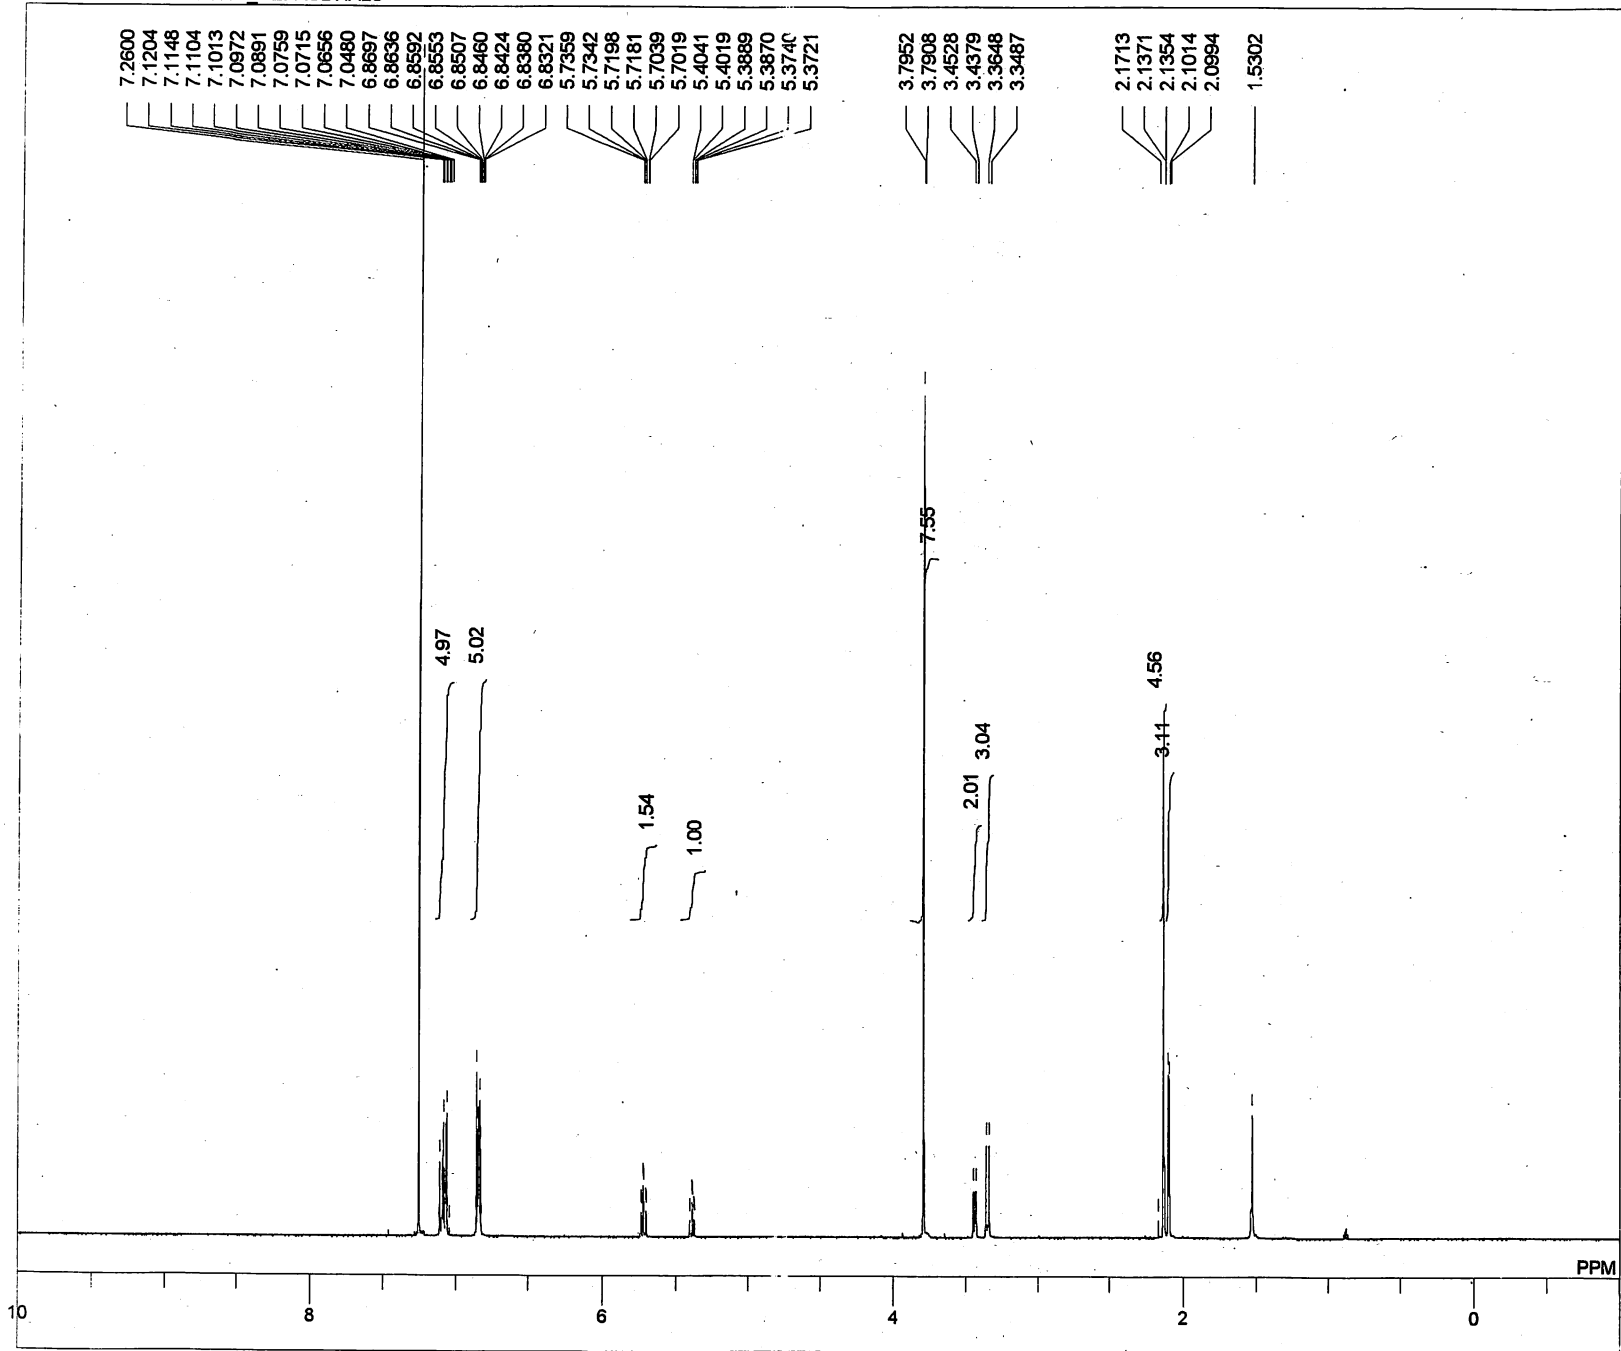

|       |                                               |
|-------|-----------------------------------------------|
| MENUF | 1H                                            |
| OBNUC | 1H                                            |
| OFR   | 499.10 MHz                                    |
| OBSET | 0.00 KHz                                      |
| OBFIN | 128885.00 Hz                                  |
| PW1   | 5.50 usec                                     |
| DEADT | 72.30 usec                                    |
| PREDL | 0.01000 msec                                  |
| IWT   | 1000.0000 msec                                |
| POINT | 65536                                         |
| SPO   | 65536                                         |
| TIMES | 16                                            |
| DUMMY | 0                                             |
| FREQU | 8000.00 Hz                                    |
| FLT   | 4000 Hz                                       |
| DELAY | 50.00 usec                                    |
| ACQTM | 8.1920 sec                                    |
| PD    | 1.0000 sec                                    |
| ADBIT | 16                                            |
| RGAIN | 28                                            |
| BF    | 0.12 Hz                                       |
| T1    | 0.00                                          |
| T2    | 0.00                                          |
| T3    | 90.00                                         |
| T4    | 100.00                                        |
| EXMOD | non                                           |
| EXPCM | single pulse nondecoupling & nonpresaturation |
| IRNUC | 1H                                            |
| IFR   | 499.10 MHz                                    |
| IRSET | 0.00 KHz                                      |
| IRFIN | 128250.00 Hz                                  |
| IRRPW | 50 usec                                       |
| IRATN | 511                                           |
| DFILE | _DEFAULT.ALS                                  |
| SF    | th5at                                         |
| LKSET | 0.00 KHz                                      |
| LKFIN | 26934.0 Hz                                    |
| LKLEV | 200                                           |
| LGAIN | 20                                            |
| LKPHS | 353                                           |
| LKSIG | 704                                           |
| CSPED | 13 Hz                                         |
| FILDC |                                               |
| FILDF |                                               |
| SLVNT | CDCL3                                         |
| DATIM | Wed Mar 18 18:55:37 2009                      |

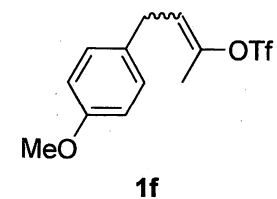

C:\WinLambda\COMMON\DEFAULT.ALS

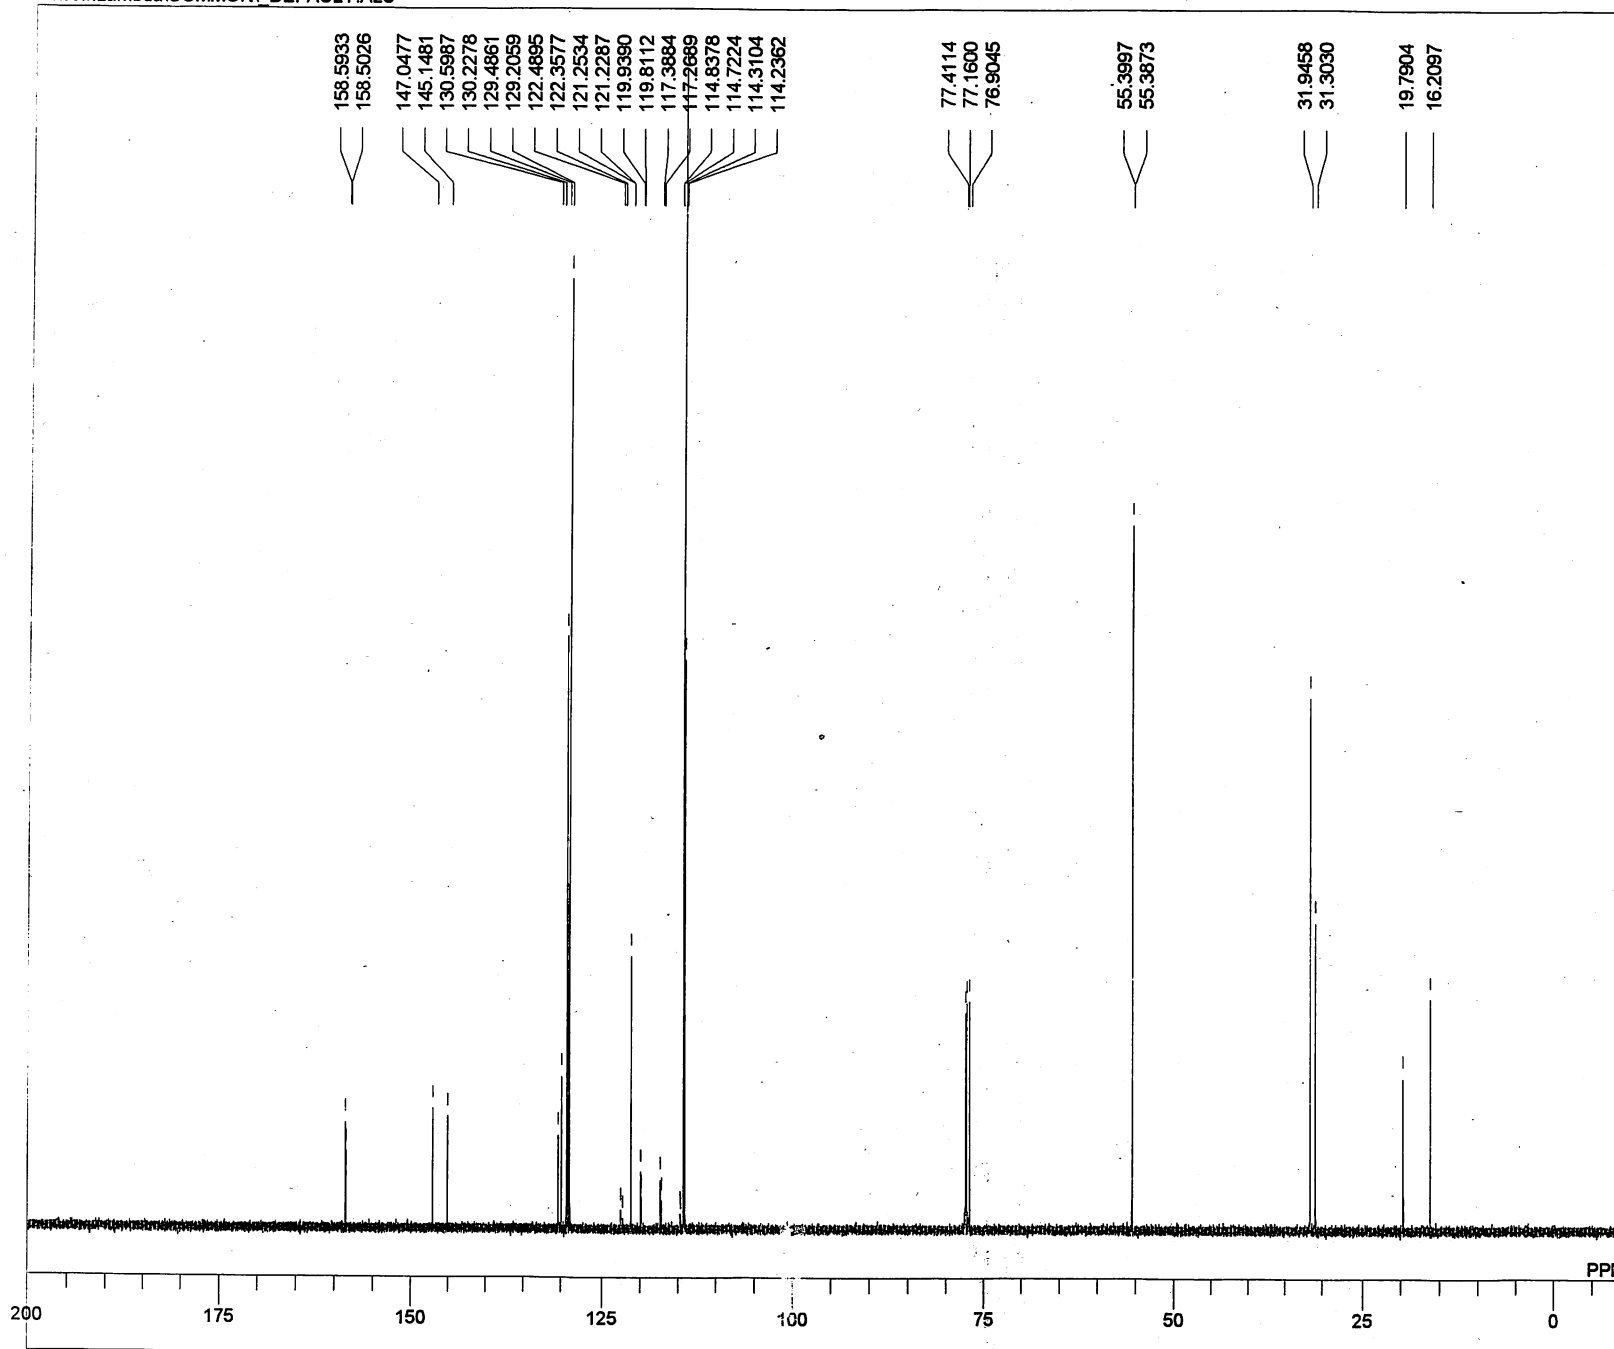

|       |                                      |
|-------|--------------------------------------|
| MENUF | 13C                                  |
| OBNUC | 13C                                  |
| OFR   | 125.40 MHz                           |
| OBSET | 0.00 KHz                             |
| OBFIN | 143041.00 Hz                         |
| PW1   | 6.25 usec                            |
| DEADT | 10.00 usec                           |
| PREDL | 0.01000 msec                         |
| IWT   | 1000.0000 msec                       |
| POINT | 65536                                |
| SPO   | 65536                                |
| TIMES | 1024                                 |
| DUMMY | 2                                    |
| FREQU | 33898.30 Hz                          |
| FLT   | 16950 Hz                             |
| DELAY | 11.80 usec                           |
| ACQTM | 1.9333 sec                           |
| PD    | 1.0670 sec                           |
| ADBIT | 16                                   |
| RGAIN | 30                                   |
| BF    | 0.12 Hz                              |
| T1    | 0.00                                 |
| T2    | 0.00                                 |
| T3    | 90.00                                |
| T4    | 100.00                               |
| EXMOD | bcm                                  |
| EXPCM | single pulse with bilevel decoupling |
| IRNUC | 1H                                   |
| IFR   | 499.10 MHz                           |
| IRSET | 0.00 KHz                             |
| IRFIN | 128250.00 Hz                         |
| IRRPW | 50 usec                              |
| IRATN | 511                                  |
| DFILE | _DEFAULT.ALS                         |
| SF    | th5at                                |
| LKSET | 0.00 KHz                             |
| LKFIN | 26934.0 Hz                           |
| LKLEV | 200                                  |
| LGAIN | 20                                   |
| LKPHS | 353                                  |
| LKSIG | 643                                  |
| CSPED | 12 Hz                                |
| FILDC |                                      |
| FILDF |                                      |
| SLVNT | CDCL3                                |
| DATIM | Thu Mar 19 17:51:35 2009             |

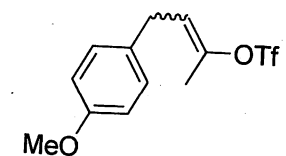

1f

ima07051column

C:\Personal\imazaki\ima07051column.als

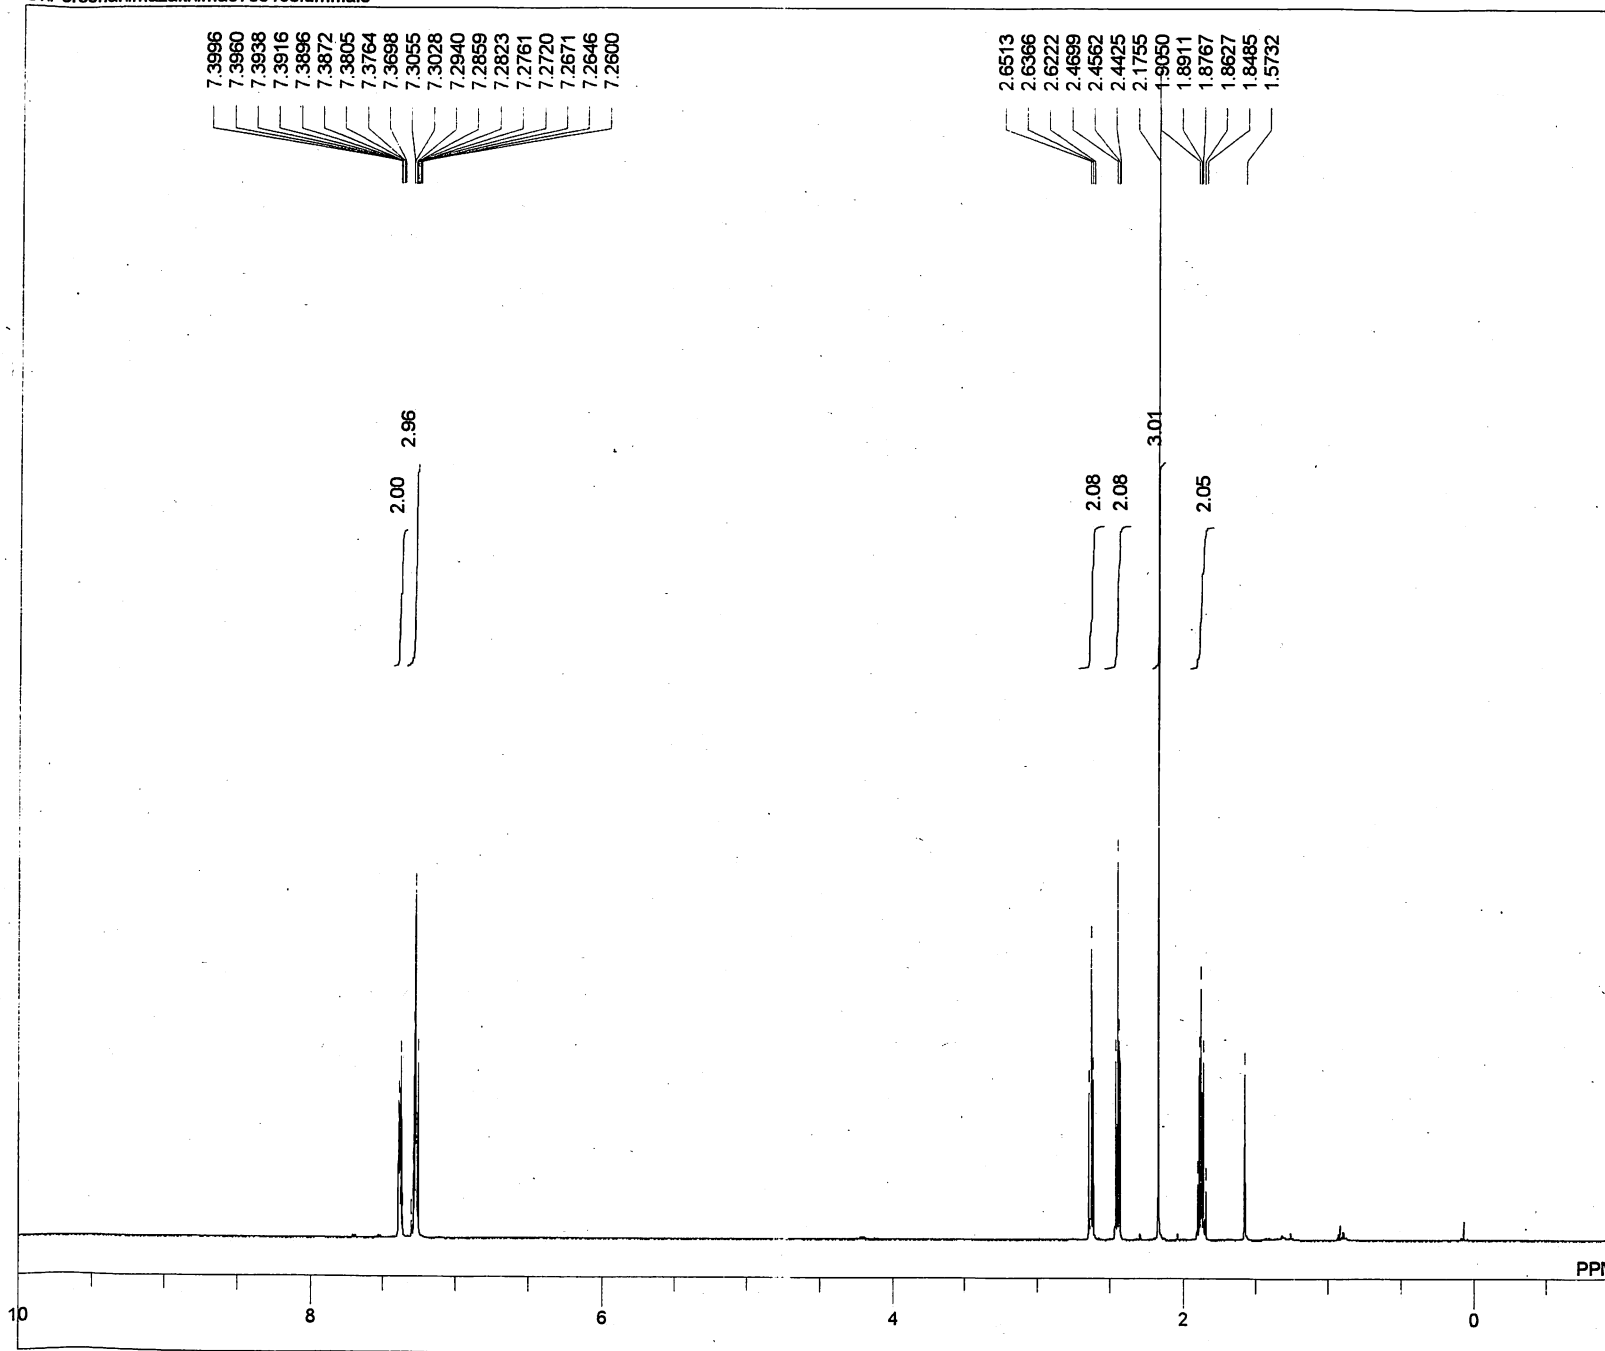

|       |                                              |
|-------|----------------------------------------------|
| MENUF | 1H                                           |
| OBNUC | 1H                                           |
| OFR   | 499.10 MHz                                   |
| OBSET | 0.00 KHz                                     |
| OBFIN | 128885.00 Hz                                 |
| PW1   | 5.50 usec                                    |
| DEADT | 72.30 usec                                   |
| PREDL | 0.01000 msec                                 |
| IWT   | 1000.0000 msec                               |
| POINT | 65536                                        |
| SPO   | 65536                                        |
| TIMES | 8                                            |
| DUMMY | 0                                            |
| FREQU | 8000.00 Hz                                   |
| FLT   | 4000 Hz                                      |
| DELAY | 50.00 usec                                   |
| ACQTM | 8.1920 sec                                   |
| PD    | 1.0000 sec                                   |
| ADBIT | 16                                           |
| RGAIN | 23                                           |
| BF    | 0.12 Hz                                      |
| T1    | 0.00                                         |
| T2    | 0.00                                         |
| T3    | 90.00                                        |
| T4    | 100.00                                       |
| EXMOD | non                                          |
| EXPCM | single pulse nondecoupling & nonpresaturator |
| IRNUC | 1H                                           |
| IFR   | 499.10 MHz                                   |
| IRSET | 0.00 KHz                                     |
| IRFIN | 128250.00 Hz                                 |
| IRRPW | 50 usec                                      |
| IRATN | 511                                          |
| DFILE | ima07051column.als                           |
| SF    | th5at                                        |
| LKSET | 0.00 KHz                                     |
| LKFIN | 26934.0 Hz                                   |
| LKLEV | 200                                          |
| LGAIn | 19                                           |
| LKPHS | 353                                          |
| LKSIG | 608                                          |
| CSPED | 13 Hz                                        |
| FILDC |                                              |
| FILDF |                                              |
| SLVNT | CDCL3                                        |
| DATIM | Thu Oct 30 14:47:30 2008                     |

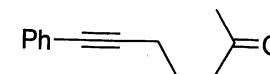

C:\WinLambda\COMMON\DEFAULT.ALS

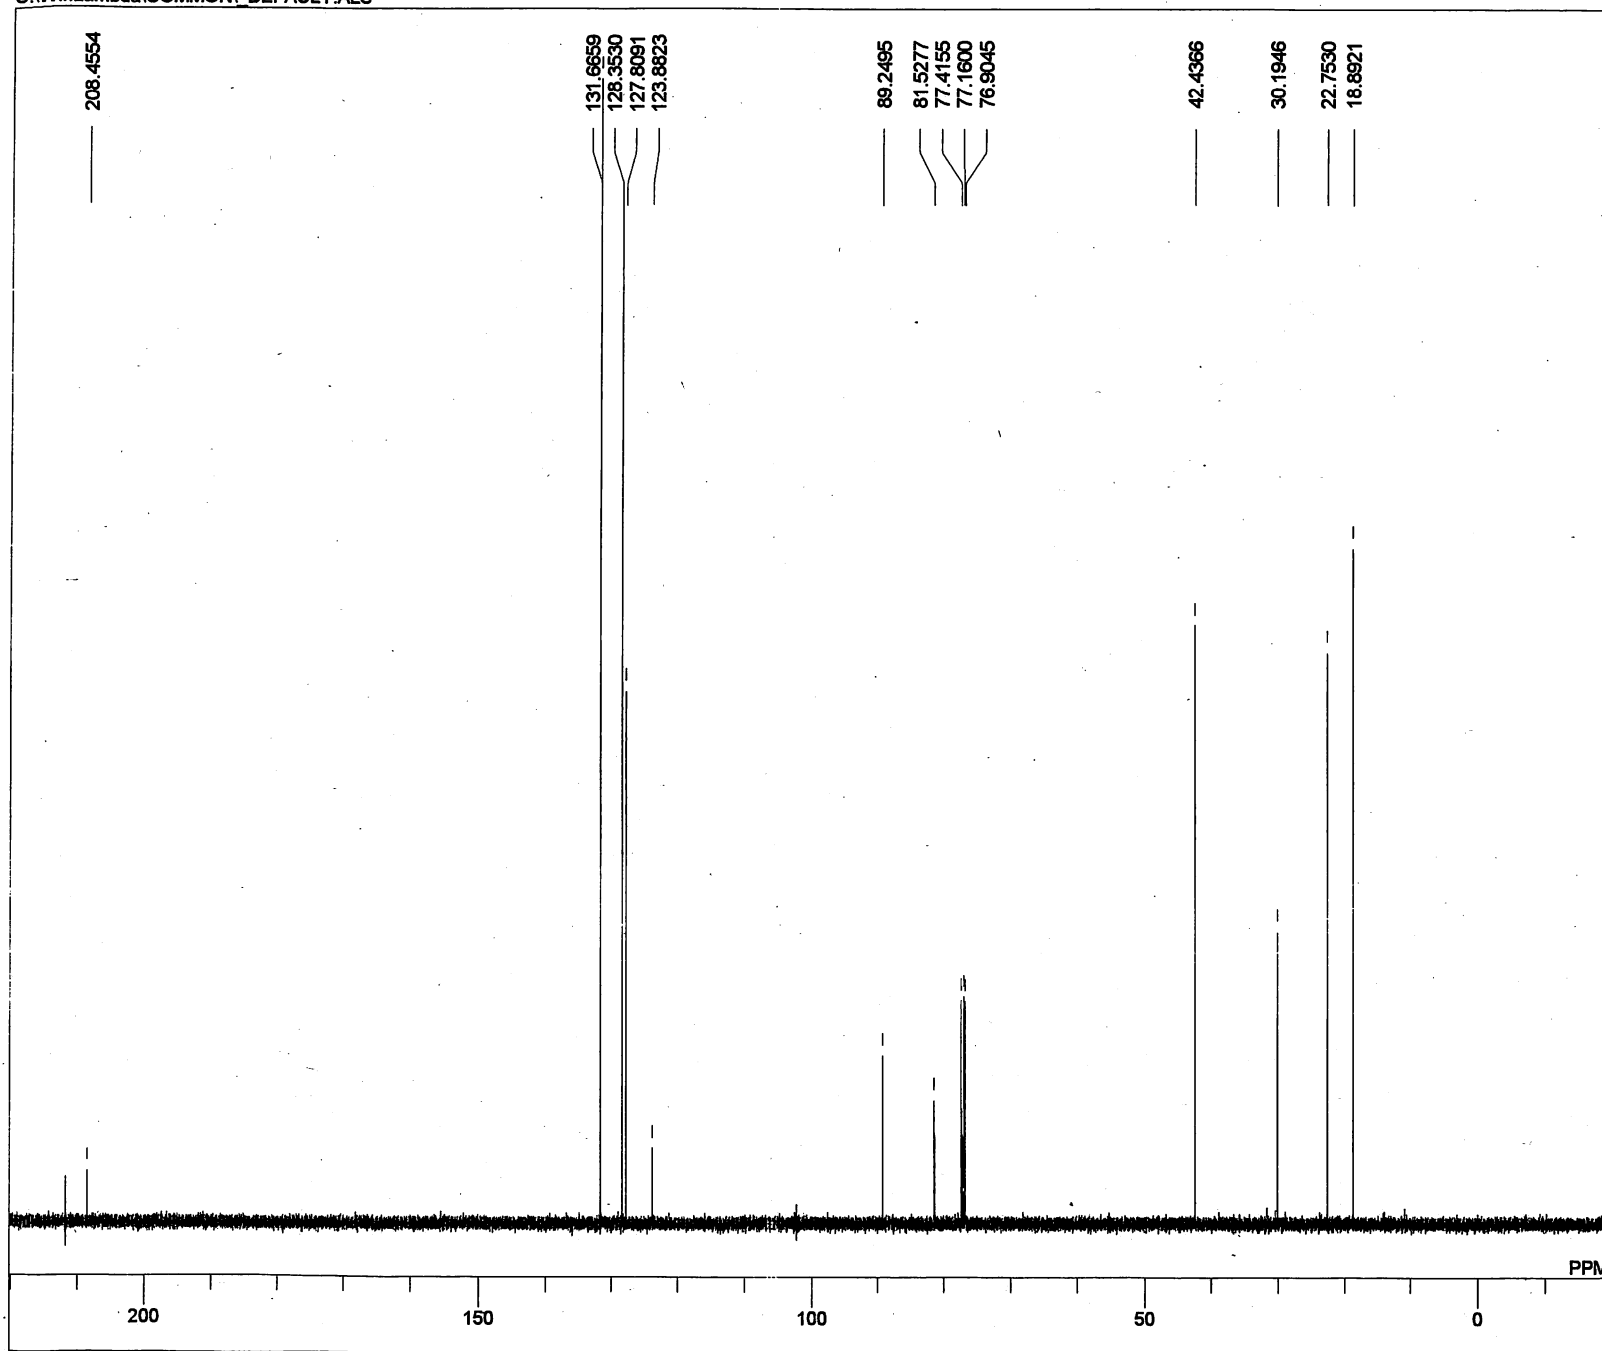

MENUF 13C  
 OBNUC 13C  
 OFR 125.40 MHz  
 OBSET 0.00 KHz  
 OBFIN 143041.00 Hz  
 PW1 6.25 usec  
 DEADT 10.00 usec  
 PREDL 0.01000 msec  
 IWT 1000.0000 msec  
 POINT 65536  
 SPO 65536  
 TIMES 256  
 DUMMY 2  
 FREQU 33898.30 Hz  
 FLT 16950 Hz  
 DELAY 11.80 usec  
 ACQTM 1.9333 sec  
 PD 1.0670 sec  
 ADBIT 16  
 RGAIN 31  
 BF 0.12 Hz  
 T1 0.00  
 T2 0.00  
 T3 90.00  
 T4 100.00  
 EXMOD bcm  
 EXPCM single pulse with bilevel decoupling  
 IRNUC 1H  
 IFR 499.10 MHz  
 IRSET 0.00 KHz  
 IRFIN 128250.00 Hz  
 IRRPW 50 usec  
 IRATN 511  
 DFILE \_DEFAULT.ALS  
 SF th5at  
 LKSET 0.00 KHz  
 LKFIN 26934.0 Hz  
 LKLEV 200  
 LGAIN 19  
 LKPHS 353  
 LKSIG 579  
 CSPED 12 Hz  
 FILDC  
 FILDF  
 SLVNT CDCL3  
 DATIM Thu Oct 30 14:17:24 2008

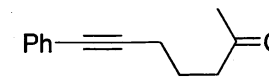

ima06085\_1H-2

C:\Personal\imazakj\ima06085\_1H2.als

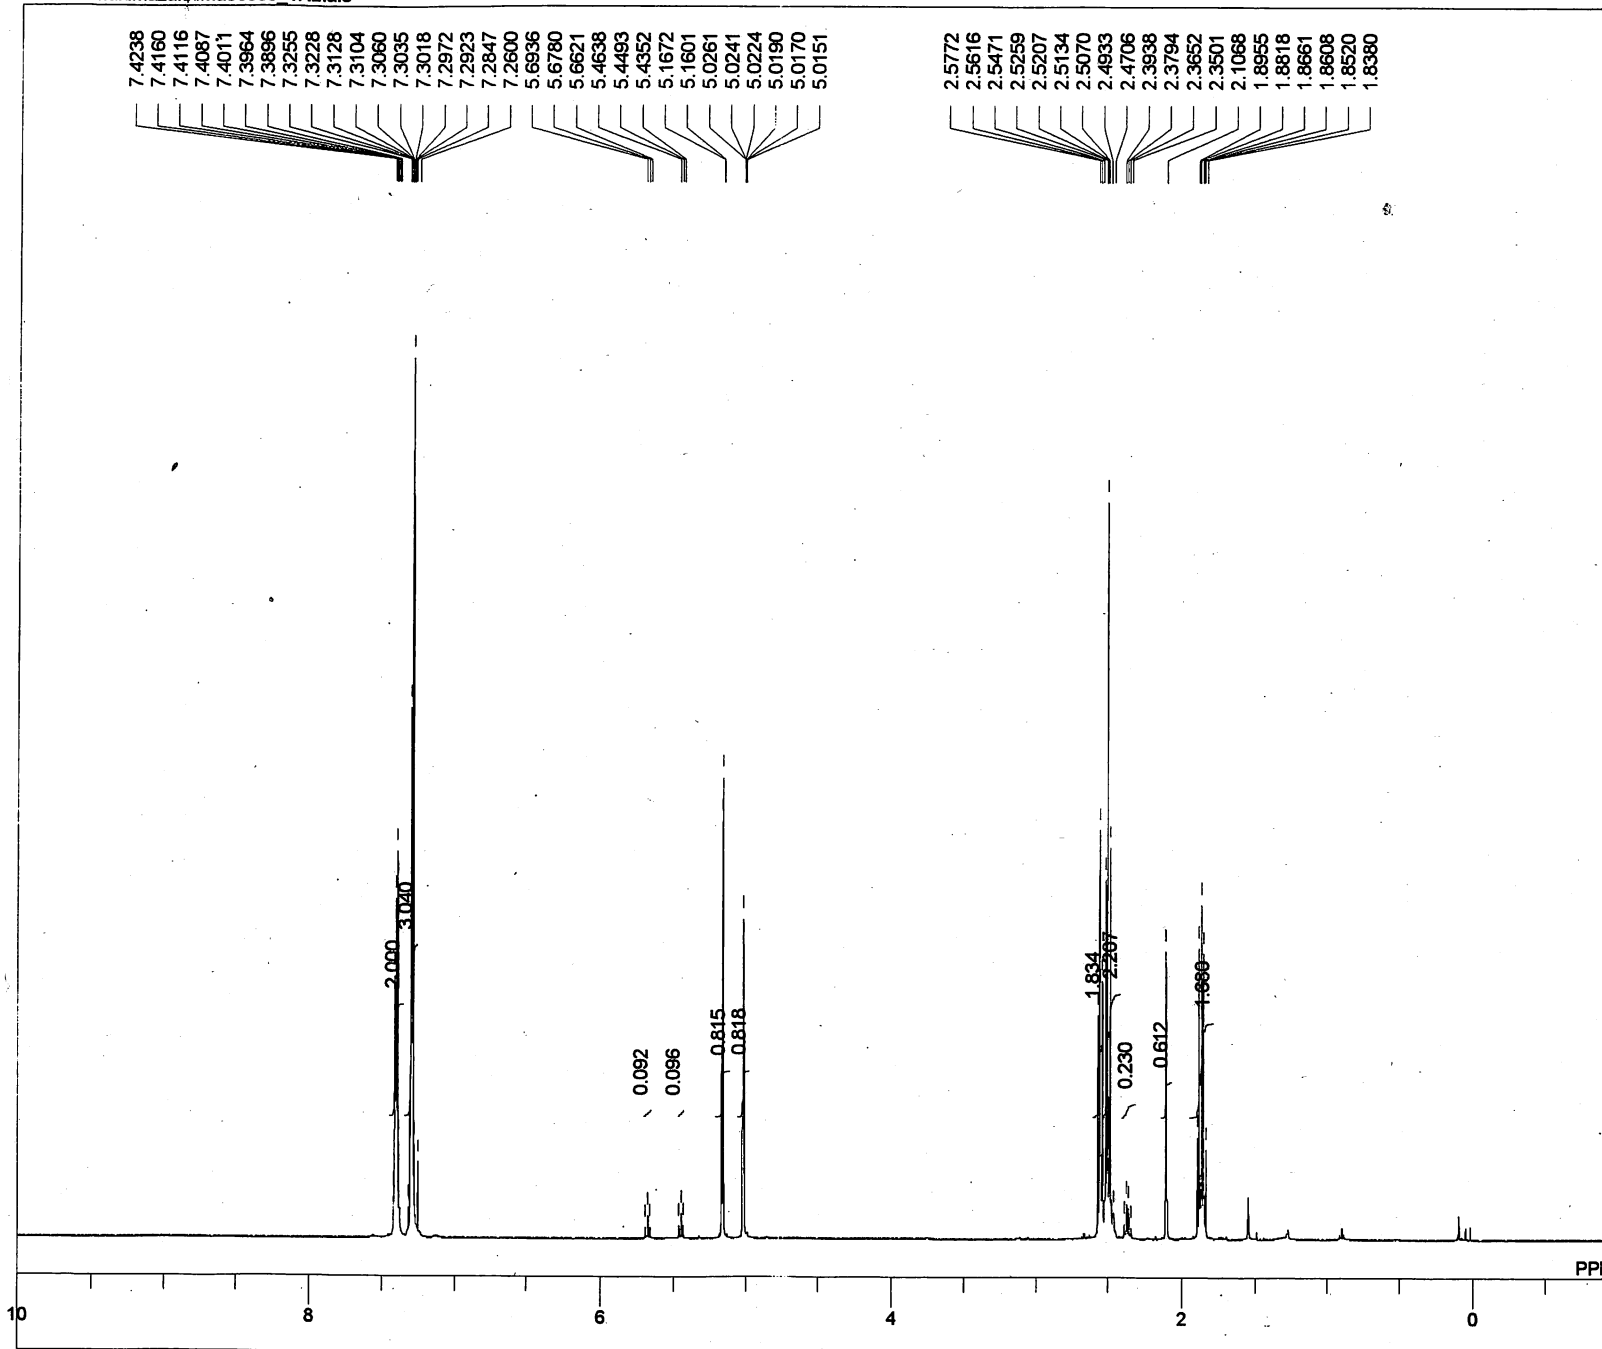

|       |                                               |
|-------|-----------------------------------------------|
| MENUF | 1H                                            |
| OBNUC | 1H                                            |
| OFR   | 499.10 MHz                                    |
| OBSET | 0.00 KHz                                      |
| OBFIN | 128885.00 Hz                                  |
| PW1   | 5.50 usec                                     |
| DEADT | 72.30 usec                                    |
| PREDL | 0.01000 msec                                  |
| IWT   | 1000.0000 msec                                |
| POINT | 65536                                         |
| SPO   | 65536                                         |
| TIMES | 8                                             |
| DUMMY | 0                                             |
| FREQU | 8000.00 Hz                                    |
| FLT   | 4000 Hz                                       |
| DELAY | 50.00 usec                                    |
| ACQTM | 8.1920 sec                                    |
| PD    | 1.0000 sec                                    |
| ADBIT | 16                                            |
| RGAIN | 18                                            |
| BF    | 0.12 Hz                                       |
| T1    | 0.00                                          |
| T2    | 0.00                                          |
| T3    | 90.00                                         |
| T4    | 100.00                                        |
| EXMOD | non                                           |
| EXPCM | single pulse nondecoupling & nonpresaturation |
| IRNUC | 1H                                            |
| IFR   | 499.10 MHz                                    |
| IRSET | 0.00 KHz                                      |
| IRFIN | 128250.00 Hz                                  |
| IRRPW | 50 usec                                       |
| IRATN | 511                                           |
| DFILE | ima06085_1H2.als                              |
| SF    | th5at                                         |
| LKSET | 0.00 KHz                                      |
| LKFIN | 26934.0 Hz                                    |
| LKLEV | 200                                           |
| LGAIN | 19                                            |
| LKPHS | 353                                           |
| LKSIG | 571                                           |
| CSPED | 10 Hz                                         |
| FILDC |                                               |
| FILDF |                                               |
| SLVNT | CDCL3                                         |
| DATIM | Sat Dec 06 15:53:11 2008                      |

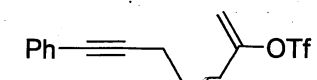

11

C:\WinLambdal\COMMON\DEFAULT.ALS

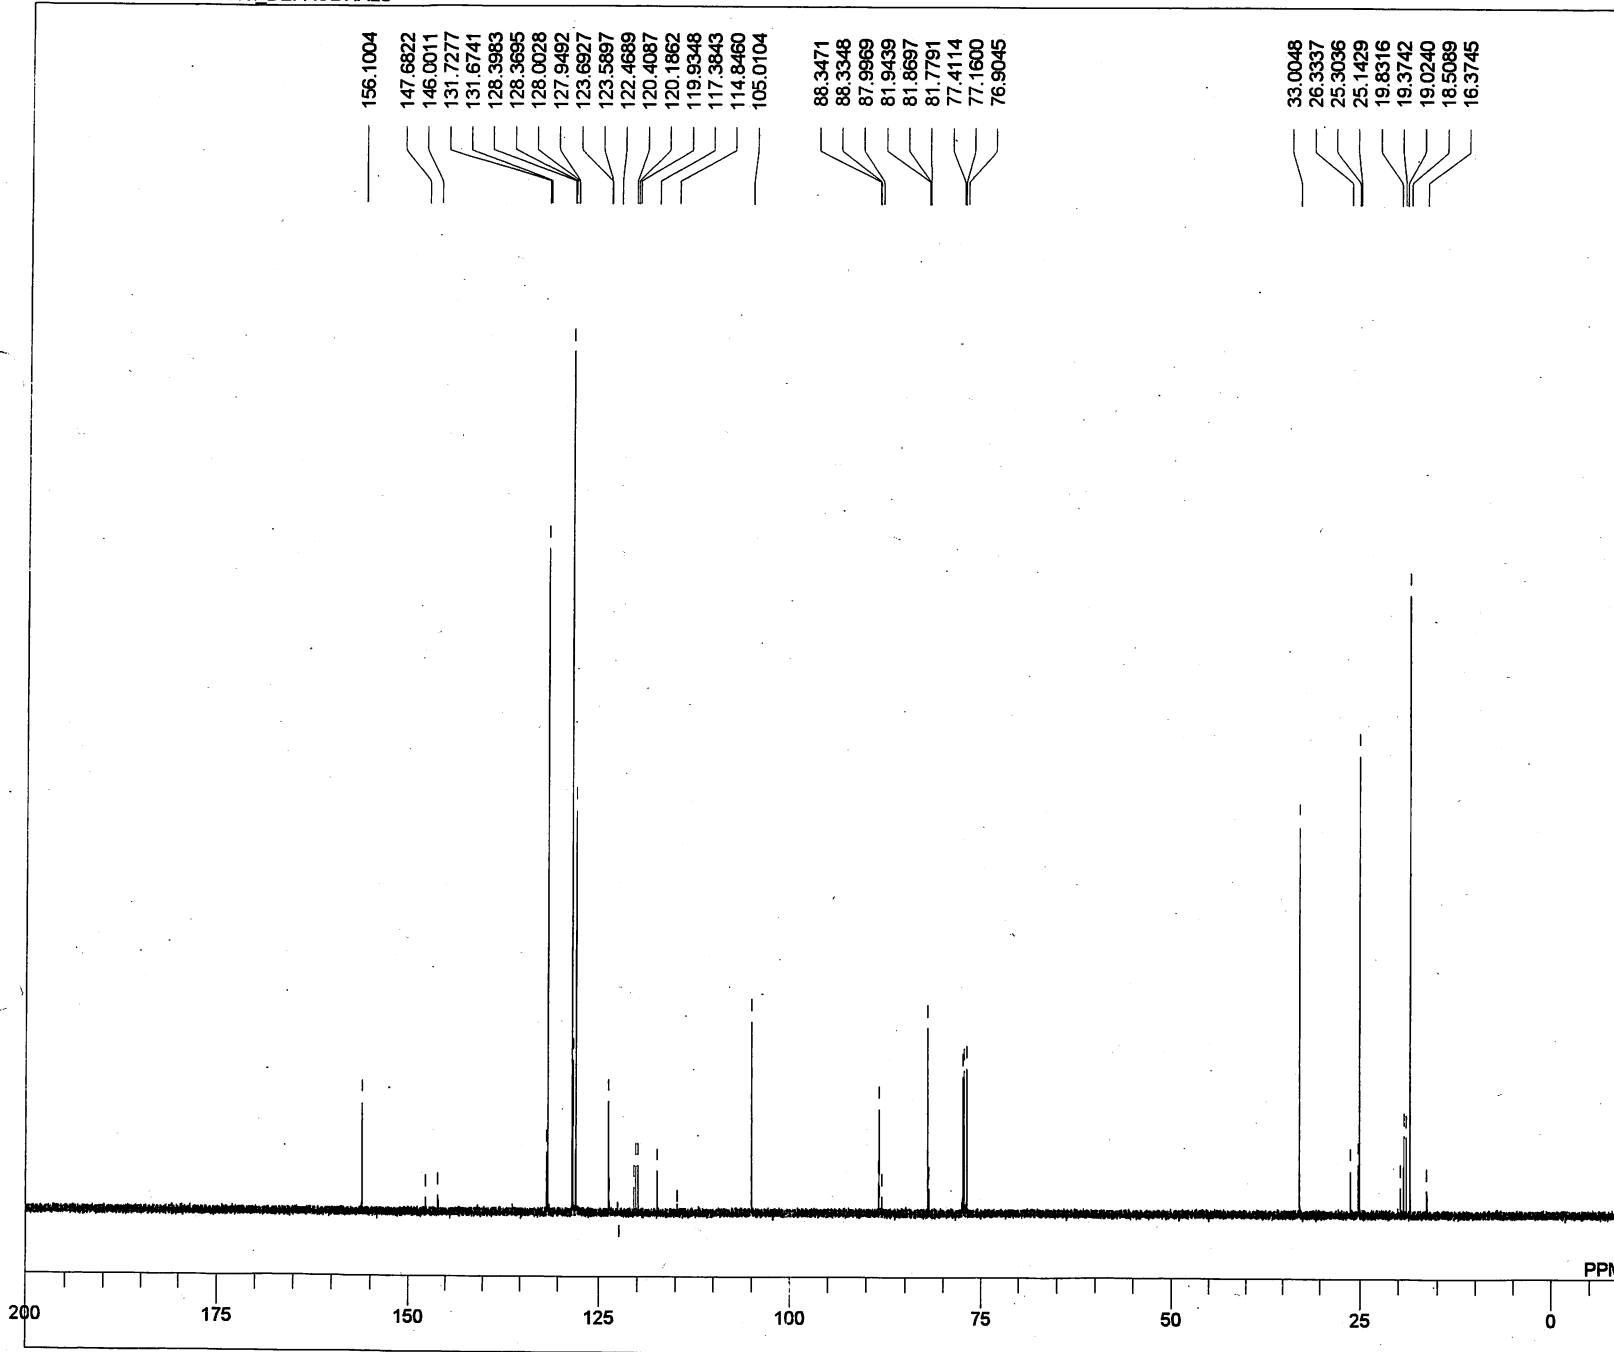

MENUF 13C  
OBNUC 13C  
OFR 125.40 MHz  
OBSET 0.00 KHz  
OBFIN 143041.00 Hz  
PW1 6.25 usec  
DEADT 10.00 usec  
PREDL 0.01000 msec  
IWT 1000.0000 msec  
POINT 65536  
SPO 65536  
TIMES 256  
DUMMY 2  
FREQU 33898.30 Hz  
FLT 16950 Hz  
DELAY 11.80 usec  
ACQTM 1.9333 sec  
PD 1.0670 sec  
ADBIT 16  
RGAIN 31  
BF 0.12 Hz  
T1 0.00  
T2 0.00  
T3 90.00  
T4 100.00  
EXMOD bcm  
EXPCM single pulse with bilevel decoupling  
IRNUC 1H  
IFR 499.10 MHz  
IRSET 0.00 KHz  
IRFIN 128250.00 Hz  
IRRPW 50 usec  
IRATN 511  
DFILE \_DEFAULT.ALS  
SF th5at  
LKSET 0.00 KHz  
LKFIN 26934.0 Hz  
LKLEV 200  
LGAIN 19  
LKPHS 353  
LKSIG 565  
CSPED 10 Hz  
FILDC  
FILDF  
SLVNT CDCL3  
DATIM Sat Dec 06 16:07:21 2008

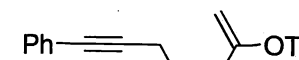

11



ima05095column3

C:\WinLambda\COMMON\\_DEFAULT.ALS

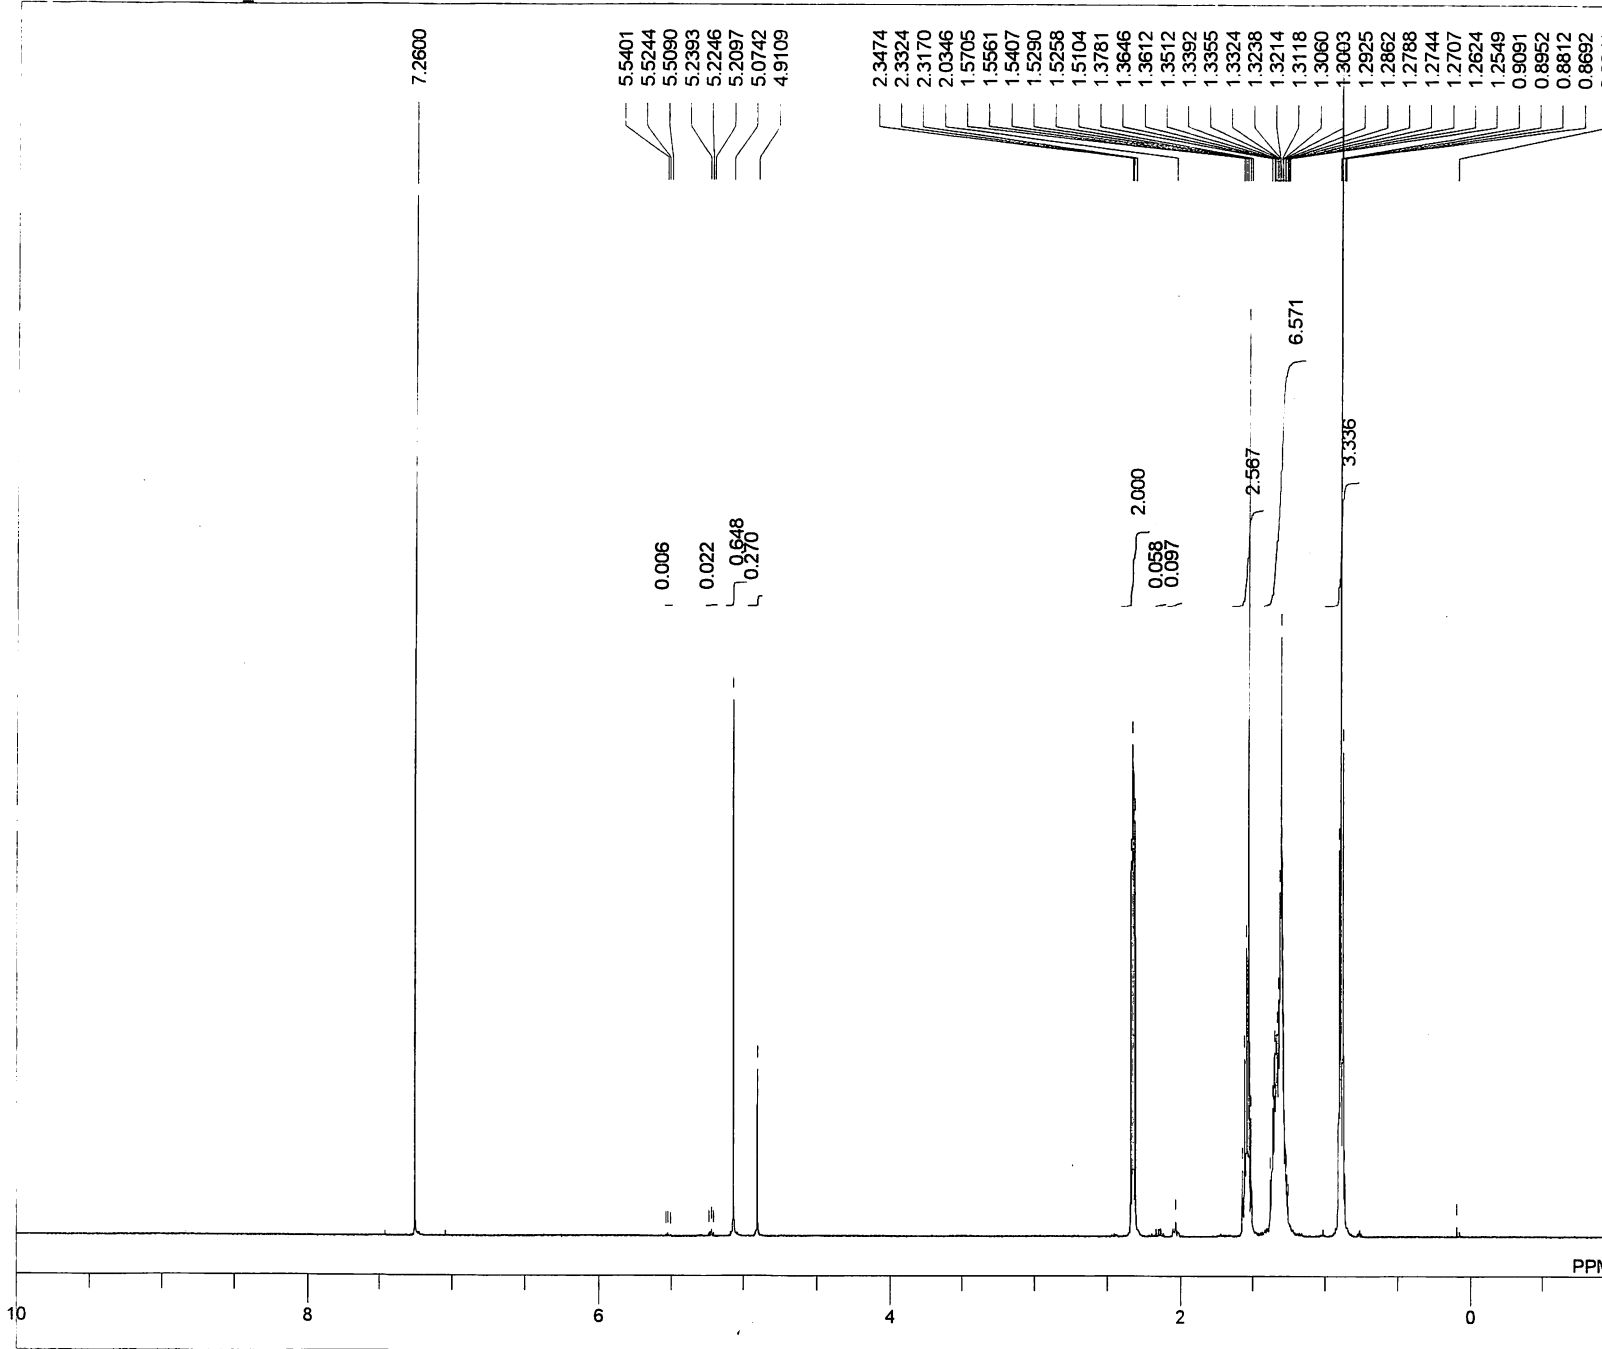

|       |                                              |
|-------|----------------------------------------------|
| MENUP | 1H                                           |
| OBNUC | 1H                                           |
| OFR   | 499.10 MHz                                   |
| OBSET | 0.00 KHz                                     |
| OBFIN | 128885.00 Hz                                 |
| PW1   | 5.50 usec                                    |
| DEADT | 72.30 usec                                   |
| PREDL | 0.01000 msec                                 |
| IWT   | 1000.0000 msec                               |
| POINT | 65536                                        |
| SPO   | 65536                                        |
| TIMES | 16                                           |
| DUMMY | 0                                            |
| FREQU | 8000.00 Hz                                   |
| FLT   | 4000 Hz                                      |
| DELAY | 50.00 usec                                   |
| ACQTM | 8.1920 sec                                   |
| PD    | 1.0000 sec                                   |
| ADBIT | 16                                           |
| RGAIN | 25                                           |
| BF    | 0.12 Hz                                      |
| T1    | 0.00                                         |
| T2    | 0.00                                         |
| T3    | 90.00                                        |
| T4    | 100.00                                       |
| EXMOD | non                                          |
| EXPCM | single pulse nondecoupling & nonpresaturator |
| IRNUC | 1H                                           |
| IFR   | 499.10 MHz                                   |
| IRSET | 0.00 KHz                                     |
| IRFIN | 128250.00 Hz                                 |
| IRRPW | 50 usec                                      |
| IRATN | 511                                          |
| DFILE | _DEFAULT.ALS                                 |
| SF    | th5at                                        |
| LKSET | 0.00 KHz                                     |
| LKFIN | 26934.0 Hz                                   |
| LKLEV | 200                                          |
| LGAIN | 20                                           |
| LKPHS | 353                                          |
| LKSIG | 698                                          |
| CSPED | 13 Hz                                        |
| FILDC |                                              |
| FILDF |                                              |
| SLVNT | CDCL3                                        |
| DATIM | Wed Jun 04 15:39:40 2008                     |

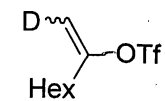

1a-d<sub>1</sub>, E/Z = 71/29

C:\WinLambda\COMMON\\_DEFAULT.ALS

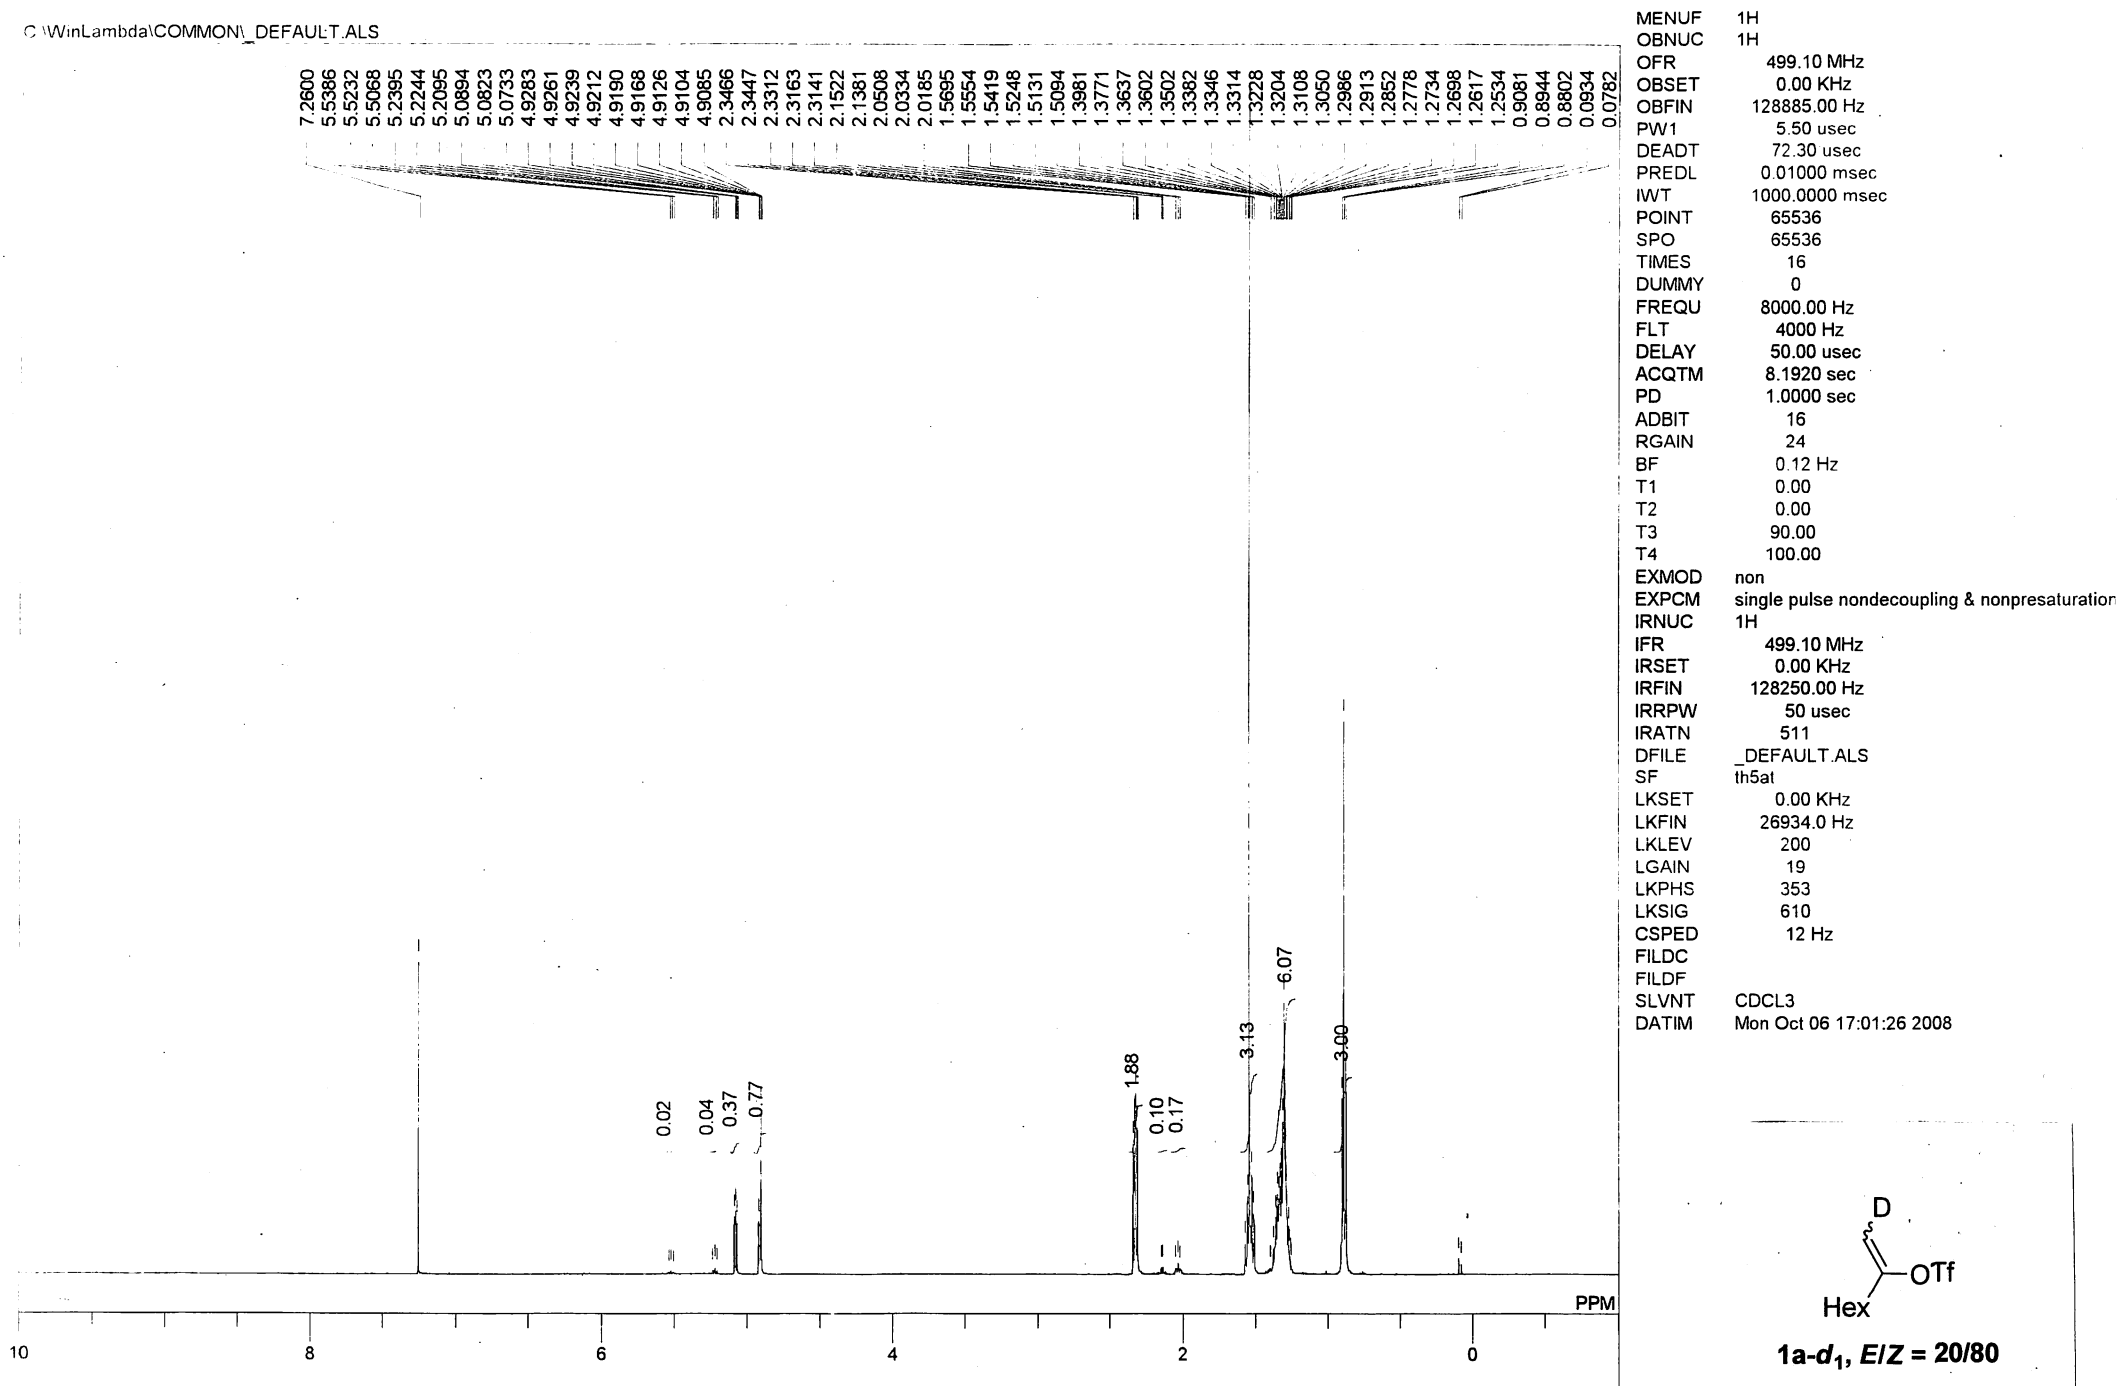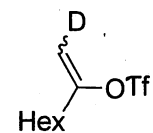

1a-d<sub>1</sub>, E/Z = 20/80

ima07037

C:\WinLambda\COMMON\_DEFAULT.ALS

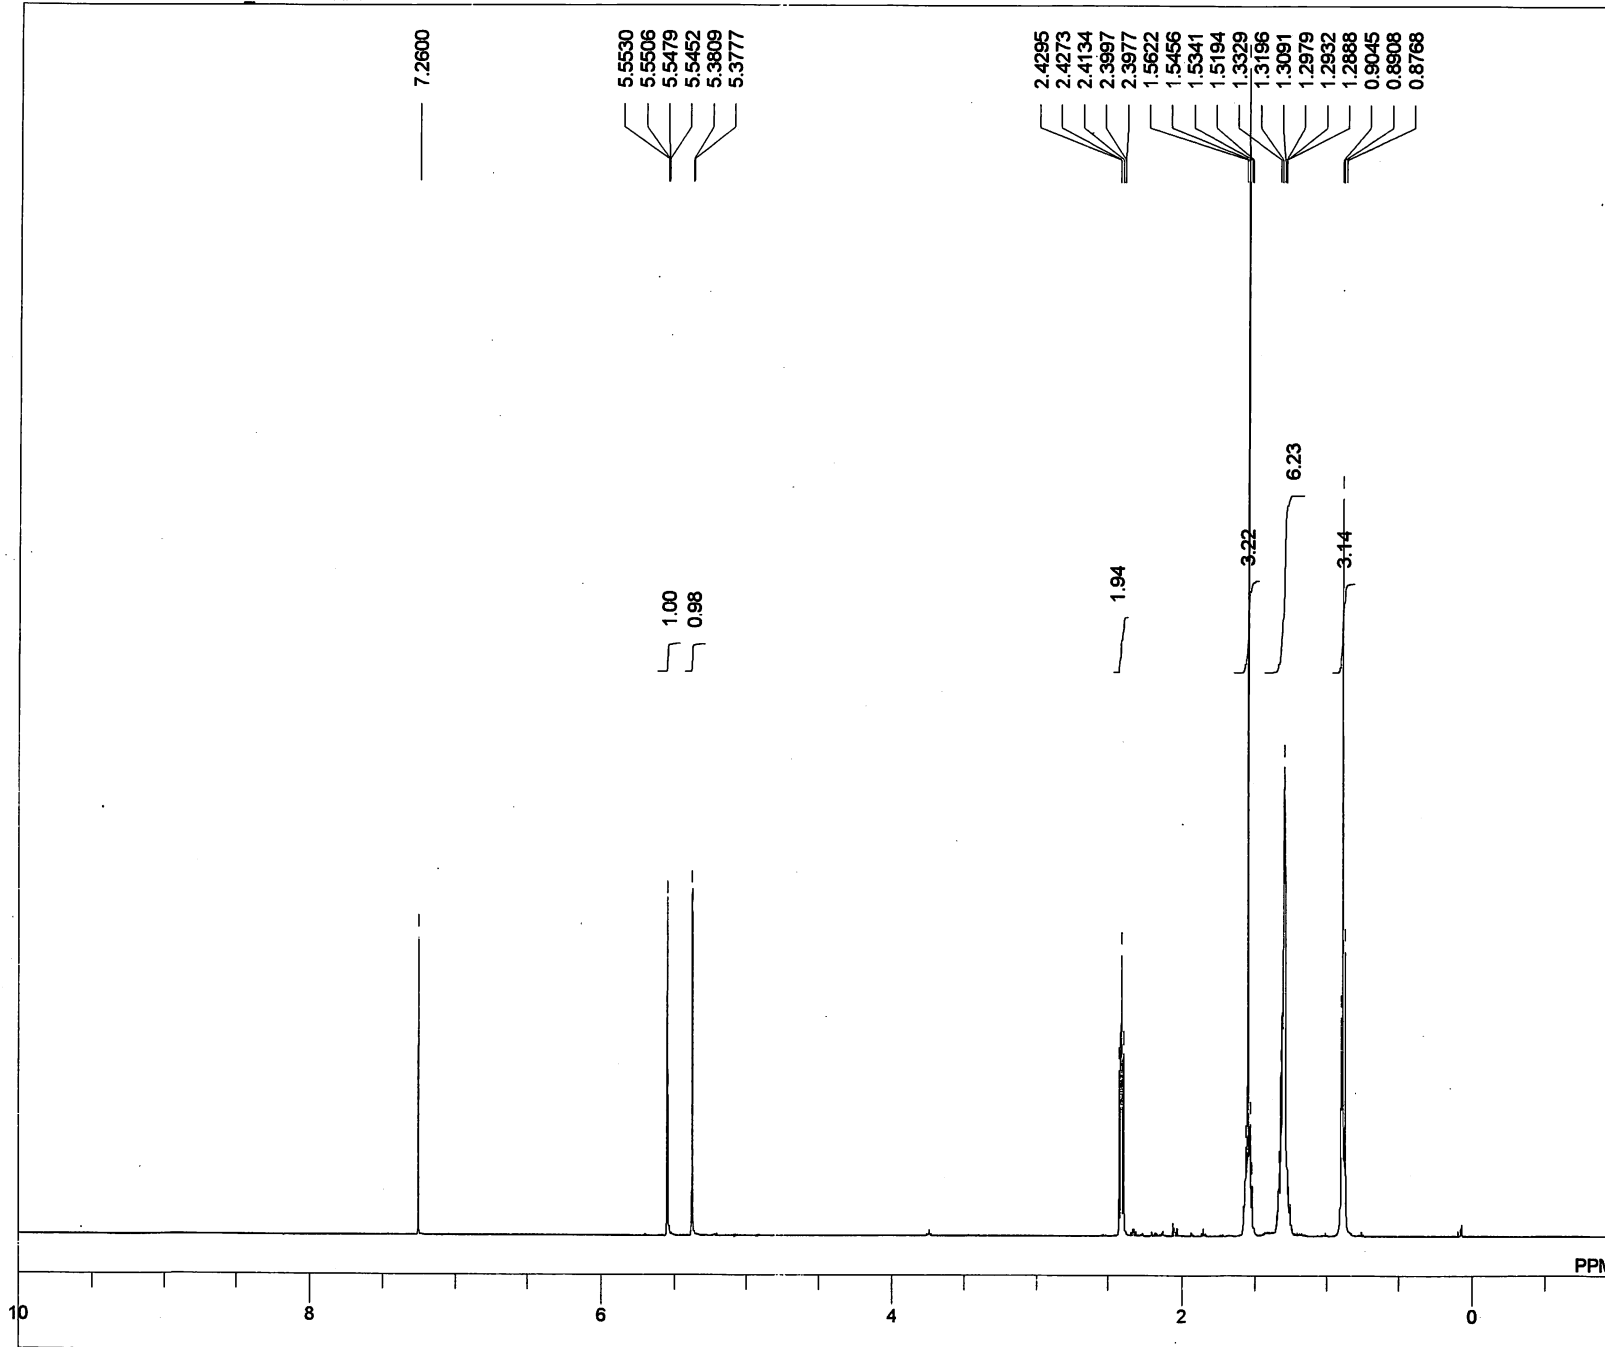

MENUF 1H  
OBNUC 1H  
OFR 499.10 MHz  
OBSET 0.00 KHz  
OBFIN 128885.00 Hz  
PW1 5.50 usec  
DEADT 72.30 usec  
PREDL 0.01000 msec  
IWT 1000.0000 msec  
POINT 65536  
SPO 65536  
TIMES 16  
DUMMY 0  
FREQU 8000.00 Hz  
FLT 4000 Hz  
DELAY 50.00 usec  
ACQTM 8.1920 sec  
PD 1.0000 sec  
ADBIT 16  
RGAIN 24  
BF 0.12 Hz  
T1 0.00  
T2 0.00  
T3 90.00  
T4 100.00  
EXMOD non  
EXPCM single pulse nondecoupling & nonpresaturation  
IRNUC 1H  
IFR 499.10 MHz  
IRSET 0.00 KHz  
IRFIN 128250.00 Hz  
IRRPW 50 usec  
IRATN 511  
DFILE DEFAULT.ALS  
SF th5at  
LKSET 0.00 KHz  
LKFIN 26934.0 Hz  
LKLEV 200  
LGAIN 20  
LKPHS 353  
LKSIG 747  
CSPED 14 Hz  
FILDC  
FILDF  
SLVNT CDCL3  
DATIM Thu Oct 16 15:00:36 2008

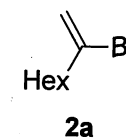

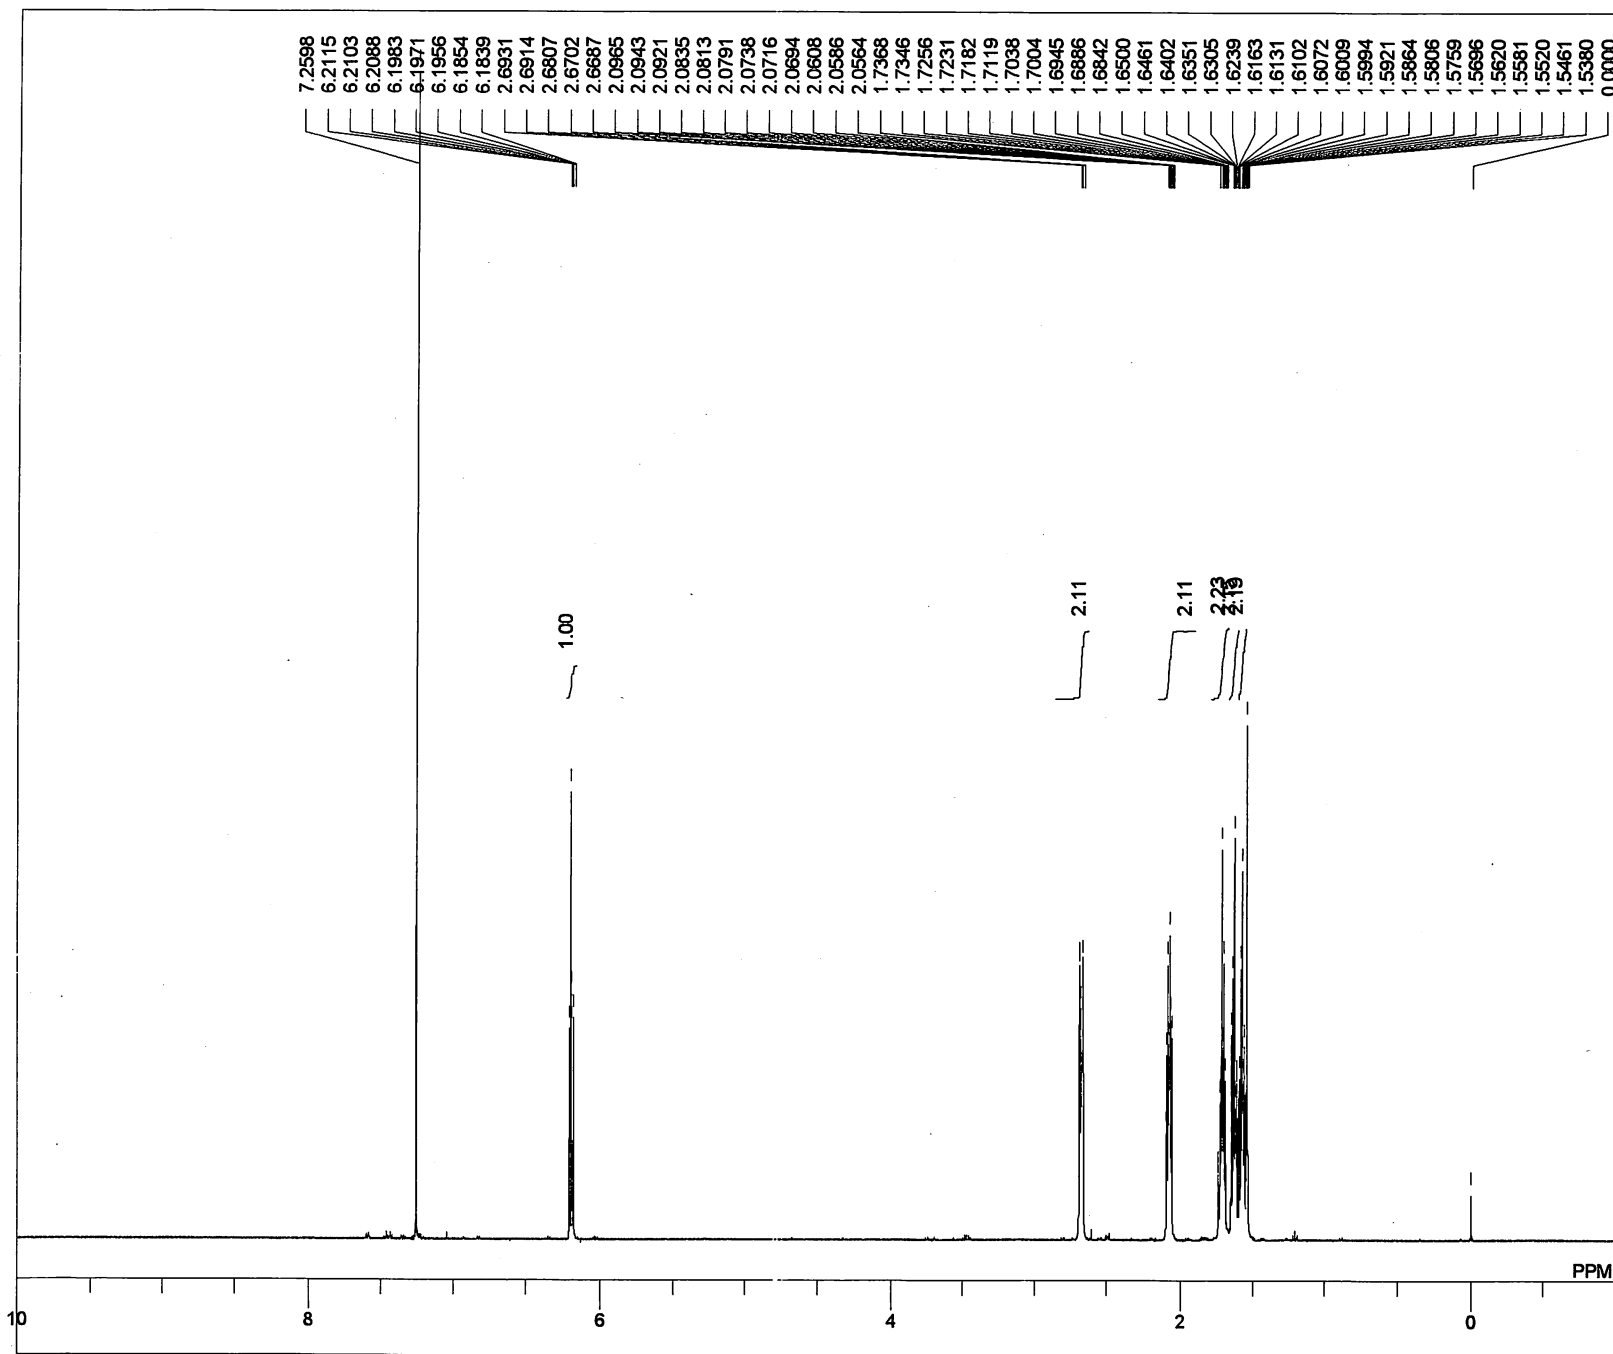

|       |                                               |
|-------|-----------------------------------------------|
| MENUF | 1H                                            |
| OBNUC | 1H                                            |
| OFR   | 499.10 MHz                                    |
| OBSET | 0.00 KHz                                      |
| OBFIN | 128885.00 Hz                                  |
| PW1   | 5.50 usec                                     |
| DEADT | 72.30 usec                                    |
| PREDL | 0.01000 msec                                  |
| IWT   | 1000.0000 msec                                |
| POINT | 65536                                         |
| SPO   | 65536                                         |
| TIMES | 8                                             |
| DUMMY | 0                                             |
| FREQU | 8000.00 Hz                                    |
| FLT   | 4000 Hz                                       |
| DELAY | 50.00 usec                                    |
| ACQTM | 8.1920 sec                                    |
| PD    | 1.0000 sec                                    |
| ADBIT | 16                                            |
| RGAIN | 24                                            |
| BF    | 0.12 Hz                                       |
| T1    | 0.00                                          |
| T2    | 0.00                                          |
| T3    | 90.00                                         |
| T4    | 100.00                                        |
| EXMOD | non                                           |
| EXPCM | single pulse nondecoupling & nonpresaturation |
| IRNUC | 1H                                            |
| IFR   | 499.10 MHz                                    |
| IRSET | 0.00 KHz                                      |
| IRFIN | 128250.00 Hz                                  |
| IRRPW | 50 usec                                       |
| IRATN | 511                                           |
| DFILE | ima05088.als                                  |
| SF    | th5at                                         |
| LKSET | 0.00 KHz                                      |
| LKFIN | 26934.0 Hz                                    |
| LKLEV | 200                                           |
| LGAIN | 20                                            |
| LKPHS | 353                                           |
| LKSIG | 705                                           |
| CSPED | 11 Hz                                         |
| FILDC |                                               |
| FILDF |                                               |
| SLVNT | CDCL3                                         |
| DATIM | Fri May 23 19:44:08 2008                      |

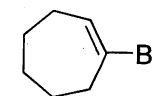

2b

C:\Personal\imazaki\ima06060.als

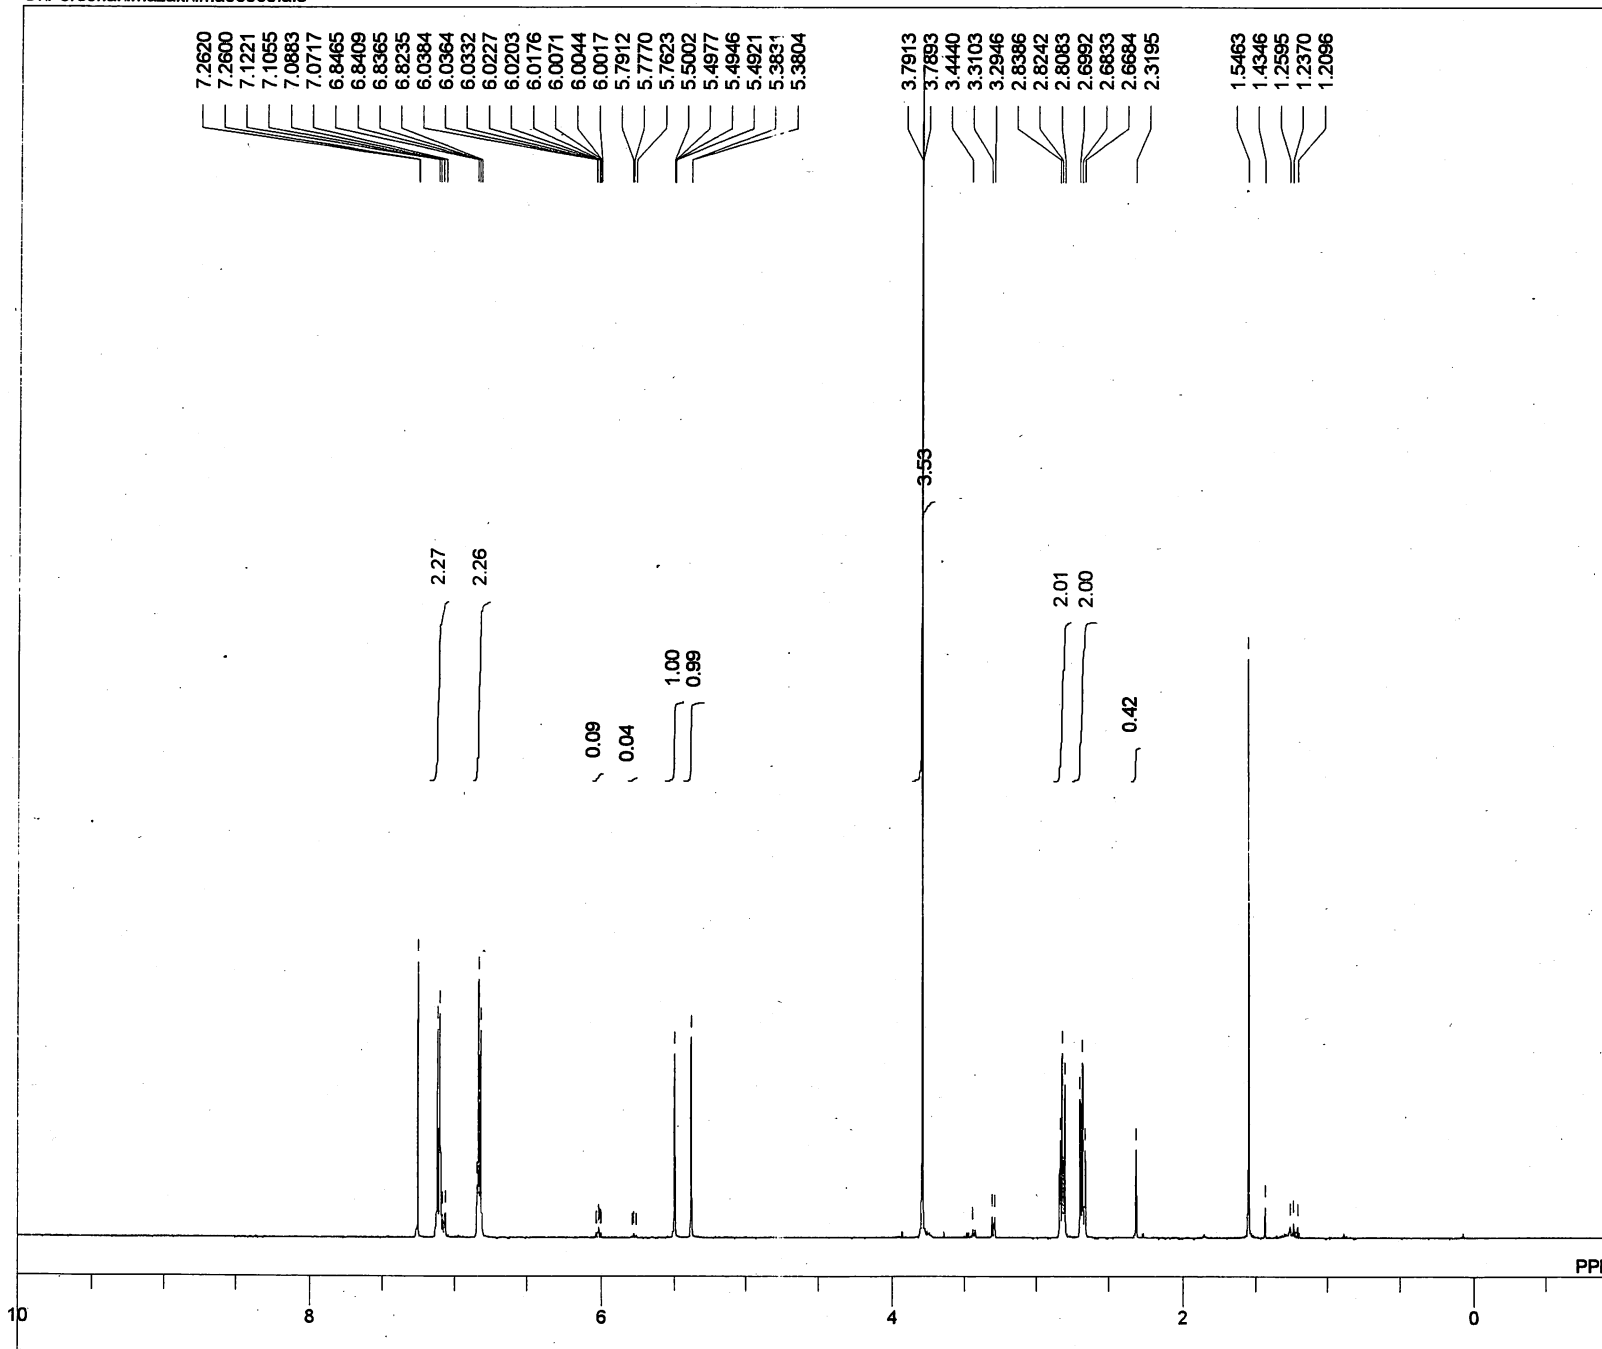

|       |                                               |
|-------|-----------------------------------------------|
| MENUF | 1H                                            |
| OBNUC | 1H                                            |
| OFR   | 499.10 MHz                                    |
| OBSET | 0.00 KHz                                      |
| OBFIN | 128885.00 Hz                                  |
| PW1   | 5.50 usec                                     |
| DEADT | 72.30 usec                                    |
| PREDL | 0.01000 msec                                  |
| IWT   | 1000.0000 msec                                |
| POINT | 65536                                         |
| SPO   | 65536                                         |
| TIMES | 16                                            |
| DUMMY | 0                                             |
| FREQU | 8000.00 Hz                                    |
| FLT   | 4000 Hz                                       |
| DELAY | 50.00 usec                                    |
| ACQTM | 8.1920 sec                                    |
| PD    | 1.0000 sec                                    |
| ADBIT | 16                                            |
| RGAIN | 26                                            |
| BF    | 0.12 Hz                                       |
| T1    | 0.00                                          |
| T2    | 0.00                                          |
| T3    | 90.00                                         |
| T4    | 100.00                                        |
| EXMOD | non                                           |
| EXPCM | single pulse nondecoupling & nonpresaturation |
| IRNUC | 1H                                            |
| IFR   | 499.10 MHz                                    |
| IRSET | 0.00 KHz                                      |
| IRFIN | 128250.00 Hz                                  |
| IRRPW | 50 usec                                       |
| IRATN | 511                                           |
| DFILE | ima06060.als                                  |
| SF    | th5at                                         |
| LKSET | 0.00 KHz                                      |
| LKFIN | 26934.0 Hz                                    |
| LKLEV | 200                                           |
| LGAIN | 20                                            |
| LKPHS | 353                                           |
| LKSIG | 609                                           |
| CSPED | 13 Hz                                         |
| FILDC |                                               |
| FILDF |                                               |
| SLVNT | CDCL3                                         |
| DATIM | Wed Jul 23 16:50:56 2008                      |

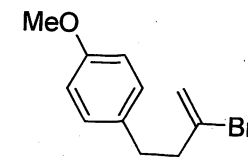

entry 1 of Table 2

ima06060\_13C

C:\WinLambda\COMMON\DEFAULT.ALS

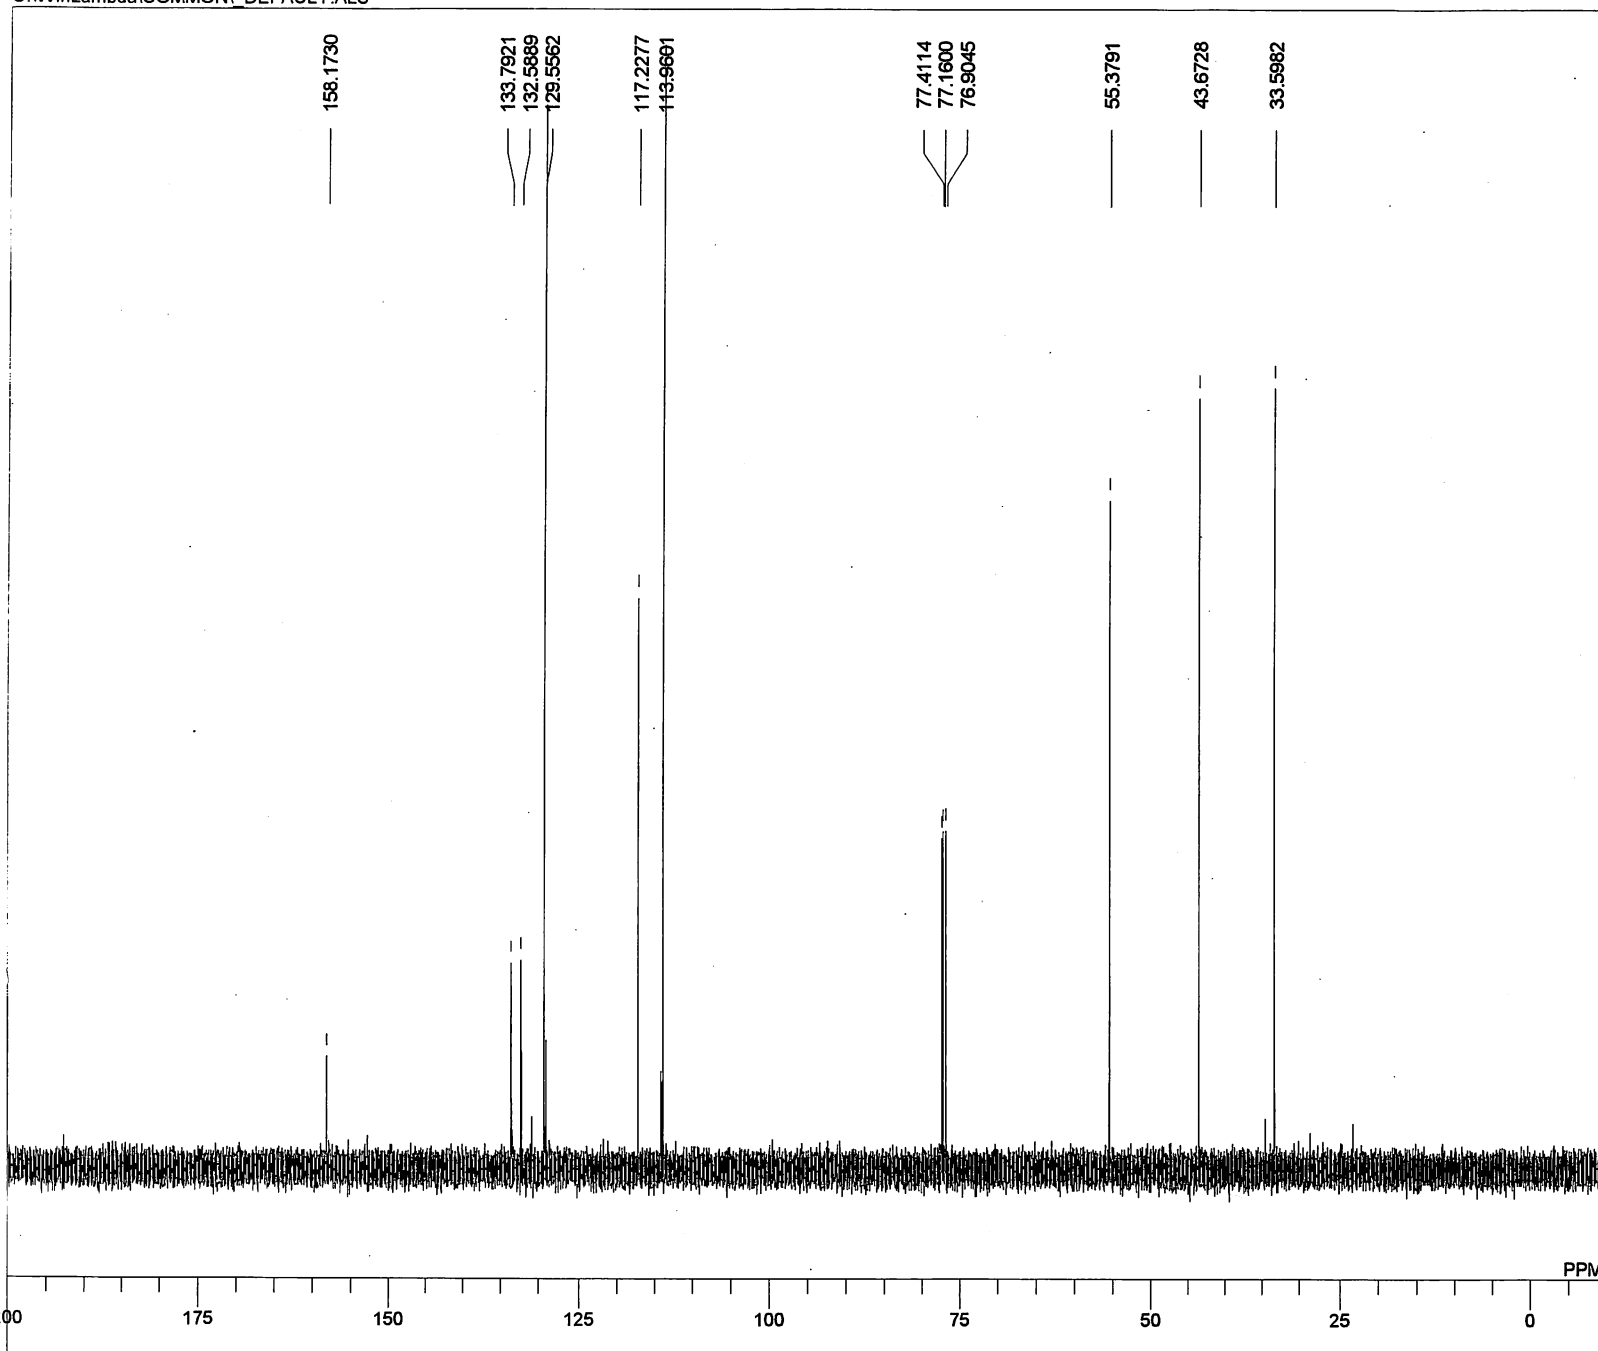

MENUF 13C  
OBNUC 13C  
OFR 125.40 MHz  
OBSET 0.00 KHz  
OBFIN 143041.00 Hz  
PW1 6.25 usec  
DEADT 10.00 usec  
PREDL 0.01000 msec  
IWT 1000.0000 msec  
POINT 65536  
SPO 65536  
TIMES 256  
DUMMY 2  
FREQU 33898.30 Hz  
FLT 16950 Hz  
DELAY 11.80 usec  
ACQTM 1.9333 sec  
PD 1.0670 sec  
ADBIT 16  
RGAIN 30  
BF 0.12 Hz  
T1 0.00  
T2 0.00  
T3 90.00  
T4 100.00  
EXMOD bcm  
EXPCM single pulse with bilevel decoupling  
IRNUC 1H  
IFR 499.10 MHz  
IRSET 0.00 KHz  
IRFIN 128250.00 Hz  
IRRPW 50 usec  
IRATN 511  
DFILE \_DEFAULT.ALS  
SF th5at  
LKSET 0.00 KHz  
LKFIN 26934.0 Hz  
LKLEV 200  
LGAIN 20  
LKPHS 353  
LKSIG 614  
CSPED 13 Hz  
FILDC  
FILDF  
SLVNT CDCL3  
DATIM Wed Jul 23 18:13:03 2008

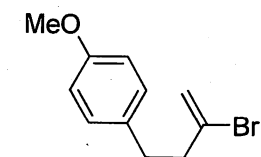

entry 1 of Table 2

ima06063

C:\WinLambda\COMMON\DEFAULT.ALS

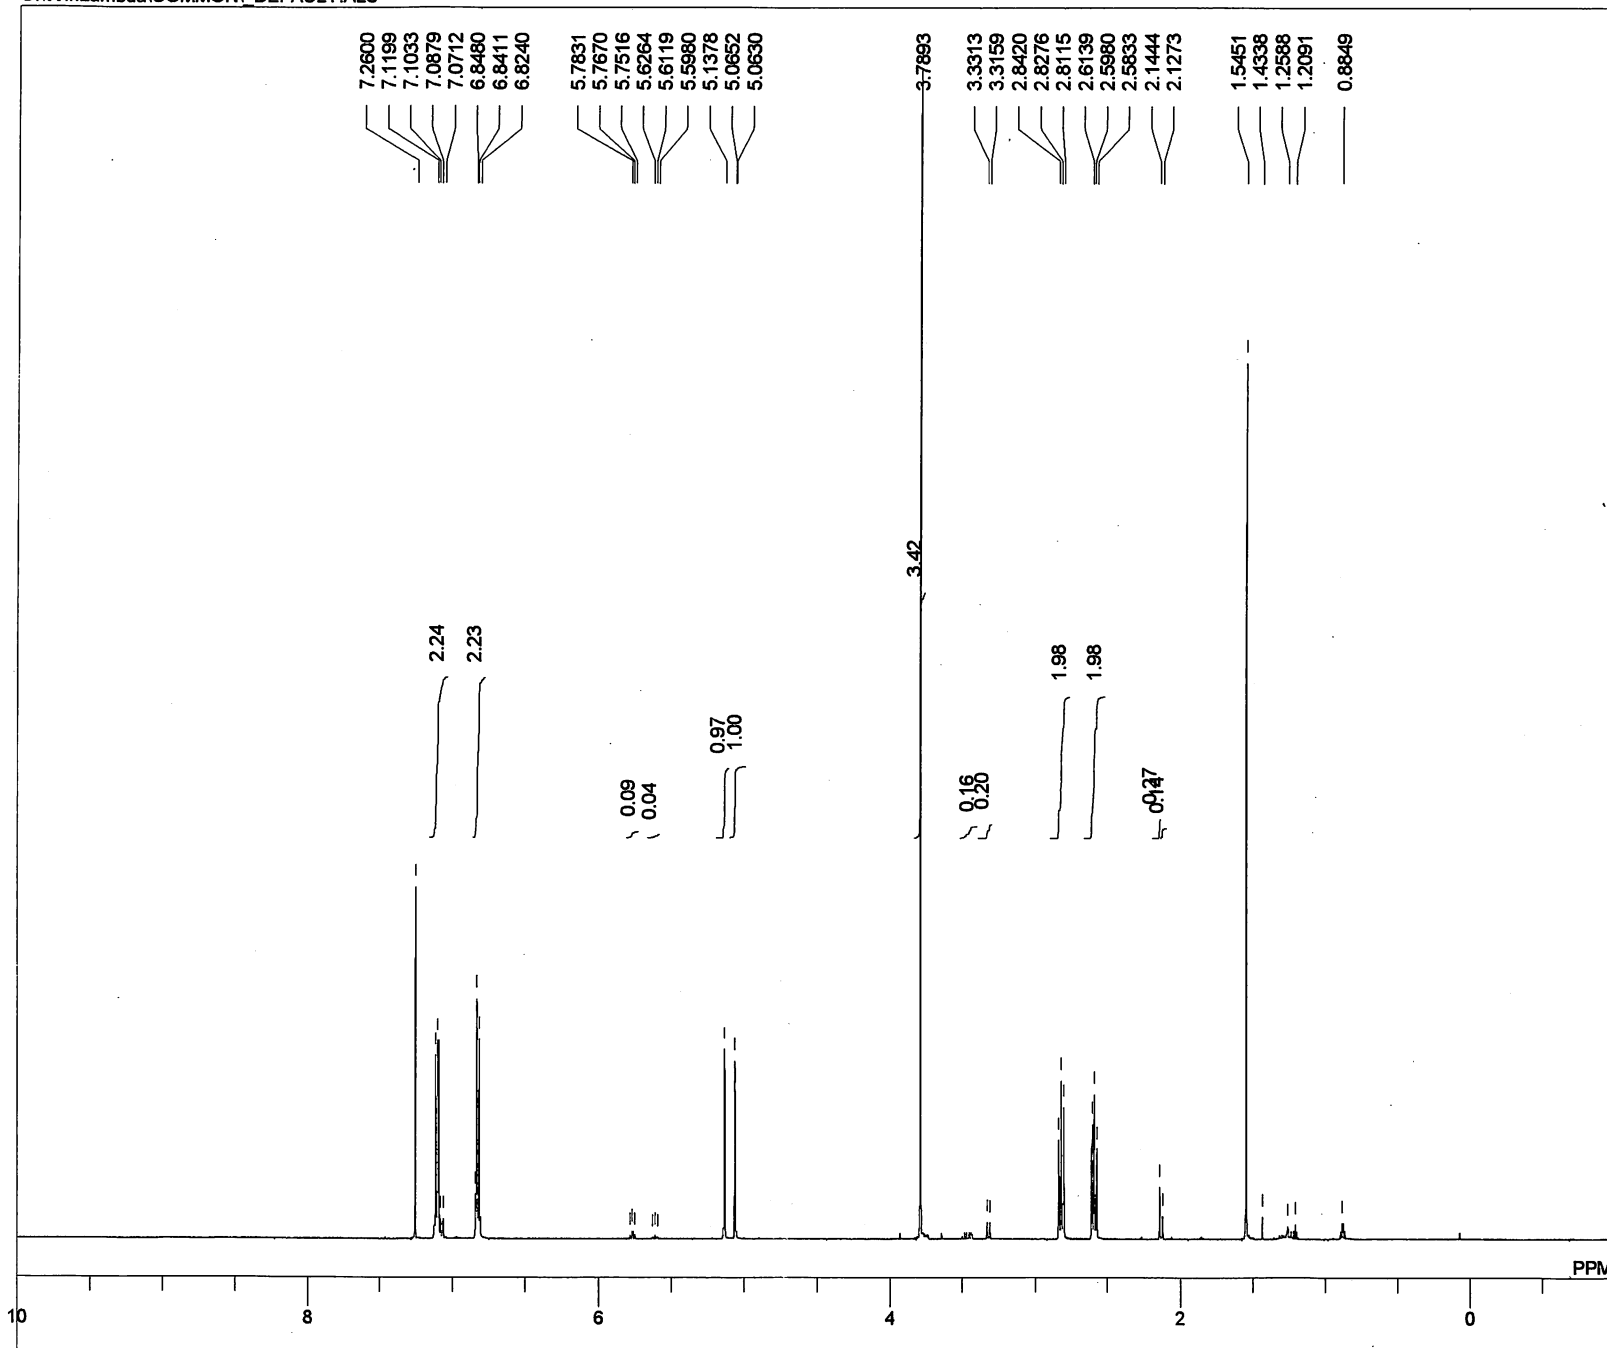

|       |                                               |
|-------|-----------------------------------------------|
| MENUF | 1H                                            |
| OBNUC | 1H                                            |
| OFR   | 499.10 MHz                                    |
| OBSET | 0.00 KHz                                      |
| OBFIN | 128885.00 Hz                                  |
| PW1   | 5.50 usec                                     |
| DEADT | 72.30 usec                                    |
| PREDL | 0.01000 msec                                  |
| IWT   | 1000.0000 msec                                |
| POINT | 65536                                         |
| SPO   | 65536                                         |
| TIMES | 16                                            |
| DUMMY | 0                                             |
| FREQU | 8000.00 Hz                                    |
| FLT   | 4000 Hz                                       |
| DELAY | 50.00 usec                                    |
| ACQTM | 8.1920 sec                                    |
| PD    | 1.0000 sec                                    |
| ADBIT | 16                                            |
| RGAIN | 26                                            |
| BF    | 0.12 Hz                                       |
| T1    | 0.00                                          |
| T2    | 0.00                                          |
| T3    | 90.00                                         |
| T4    | 100.00                                        |
| EXMOD | non                                           |
| EXPCM | single pulse nondecoupling & nonpresaturation |
| IRNUC | 1H                                            |
| IFR   | 499.10 MHz                                    |
| IRSET | 0.00 KHz                                      |
| IRFIN | 128250.00 Hz                                  |
| IRRPW | 50 usec                                       |
| IRATN | 511                                           |
| DFILE | _DEFAULT.ALS                                  |
| SF    | th5at                                         |
| LKSET | 0.00 KHz                                      |
| LKFIN | 26934.0 Hz                                    |
| LKLEV | 200                                           |
| LGAIN | 20                                            |
| LKPHS | 353                                           |
| LKSIG | 674                                           |
| CSPED | 12 Hz                                         |
| FILDC |                                               |
| FILDF |                                               |
| SLVNT | CDCL3                                         |
| DATIM | Thu Jul 24 16:16:22 2008                      |

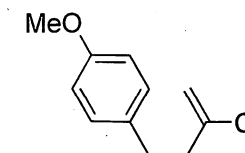

entry 2 of Table 2

ima06063\_13C

C:\WinLambda\COMMON\_DEFAULT.ALS

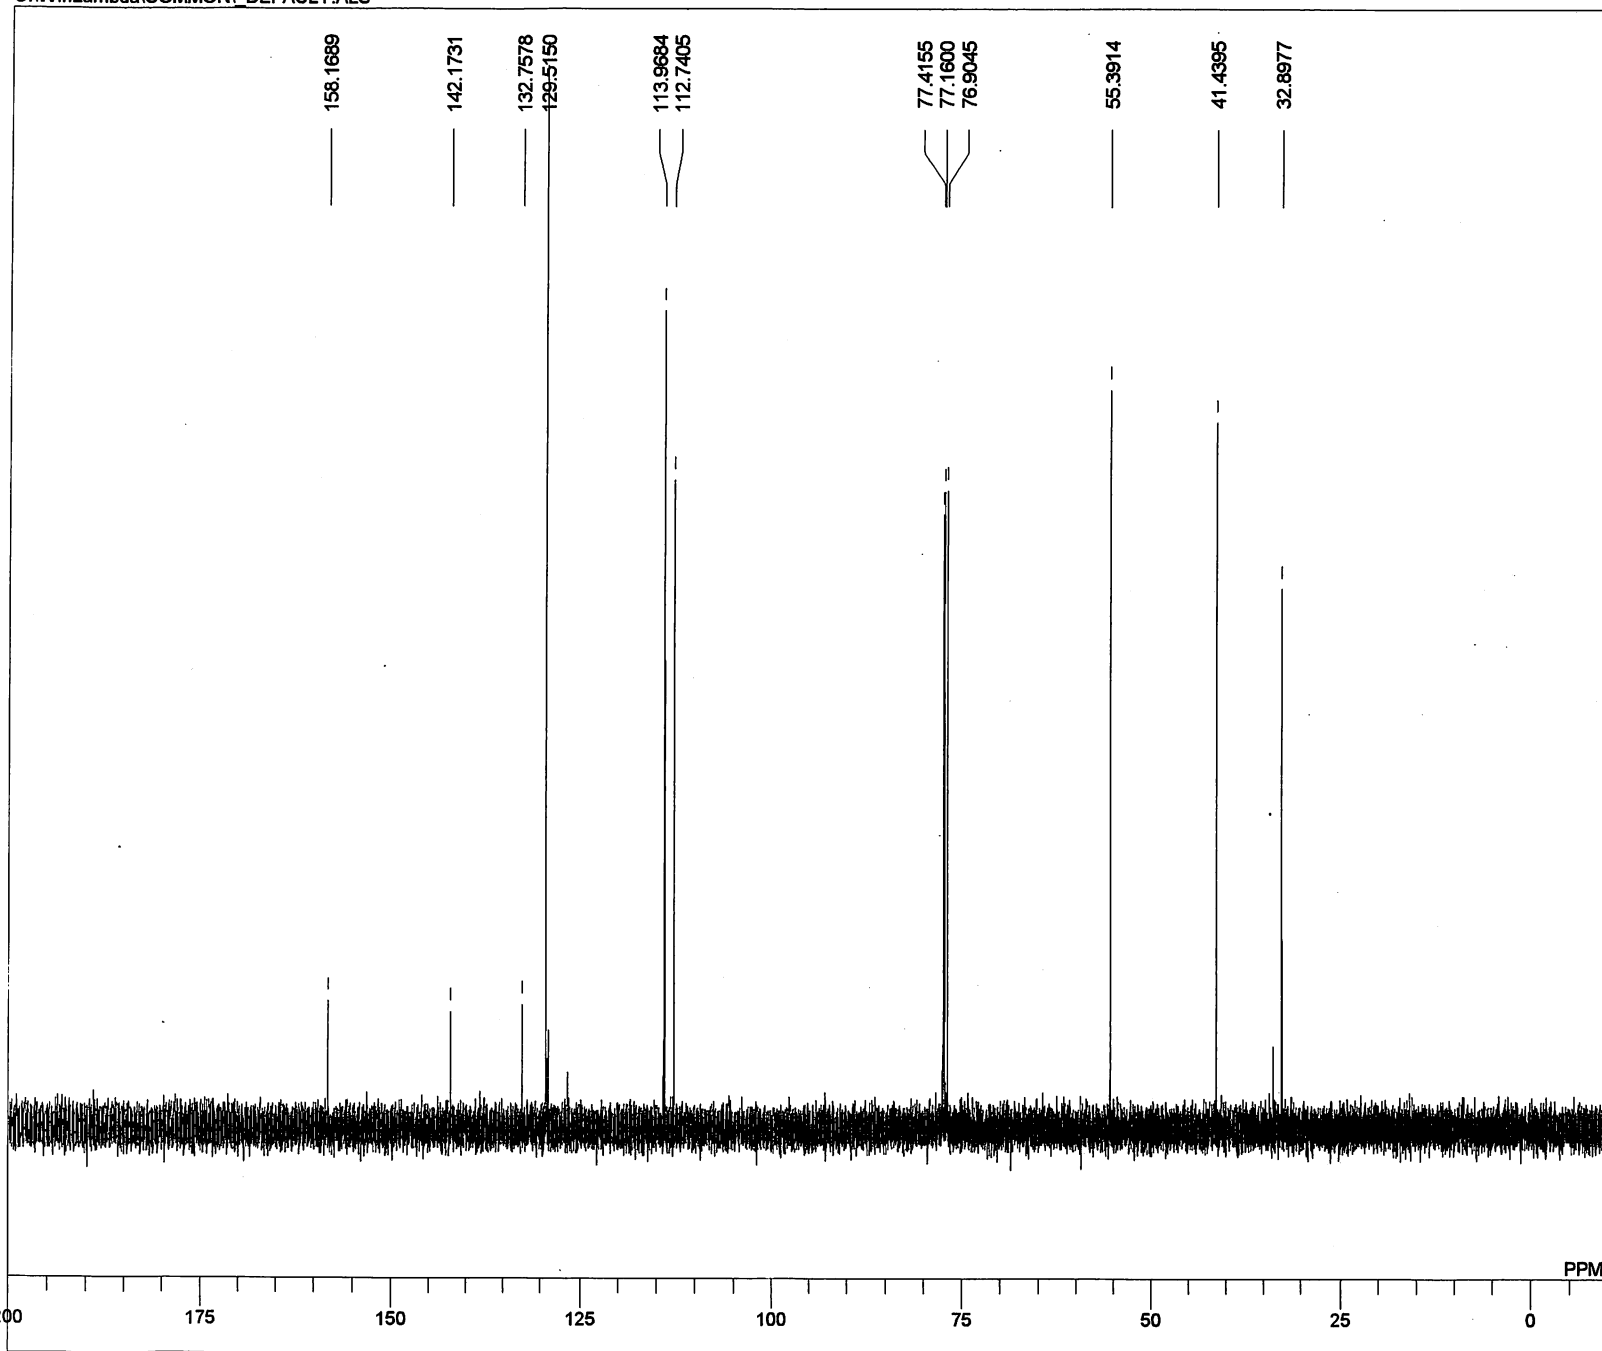

MENUF 13C  
OBNUC 13C  
OFR 125.40 MHz  
OBSET 0.00 KHz  
OBFIN 143041.00 Hz  
PW1 6.25 usec  
DEADT 10.00 usec  
PREDL 0.01000 msec  
IWT 1000.0000 msec  
POINT 65536  
SPO 65536  
TIMES 144  
DUMMY 2  
FREQU 33898.30 Hz  
FLT 16950 Hz  
DELAY 11.80 usec  
ACQTM 1.9333 sec  
PD 1.0670 sec  
ADBIT 16  
RGAIN 30  
BF 0.12 Hz  
T1 0.00  
T2 0.00  
T3 90.00  
T4 100.00  
EXMOD bcm  
EXPCM single pulse with bilevel decoupling  
IRNUC 1H  
IFR 499.10 MHz  
IRSET 0.00 KHz  
IRFIN 128250.00 Hz  
IRRPW 50 usec  
IRATN 511  
DFILE \_DEFAULT.ALS  
SF th5at  
LKSET 0.00 KHz  
LKFIN 26934.0 Hz  
LKLEV 200  
LGAIN 20  
LKPHS 353  
LKSIG 625  
CSPED 12 Hz  
FILDC  
FILDF  
SLVNT CDCL3  
DATIM Thu Jul 24 17:05:38 2008

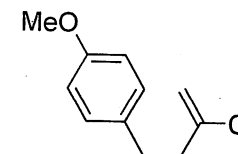

entry 2 of Table 2



C:\Personal\imazaki\ima\_Anisyll.als

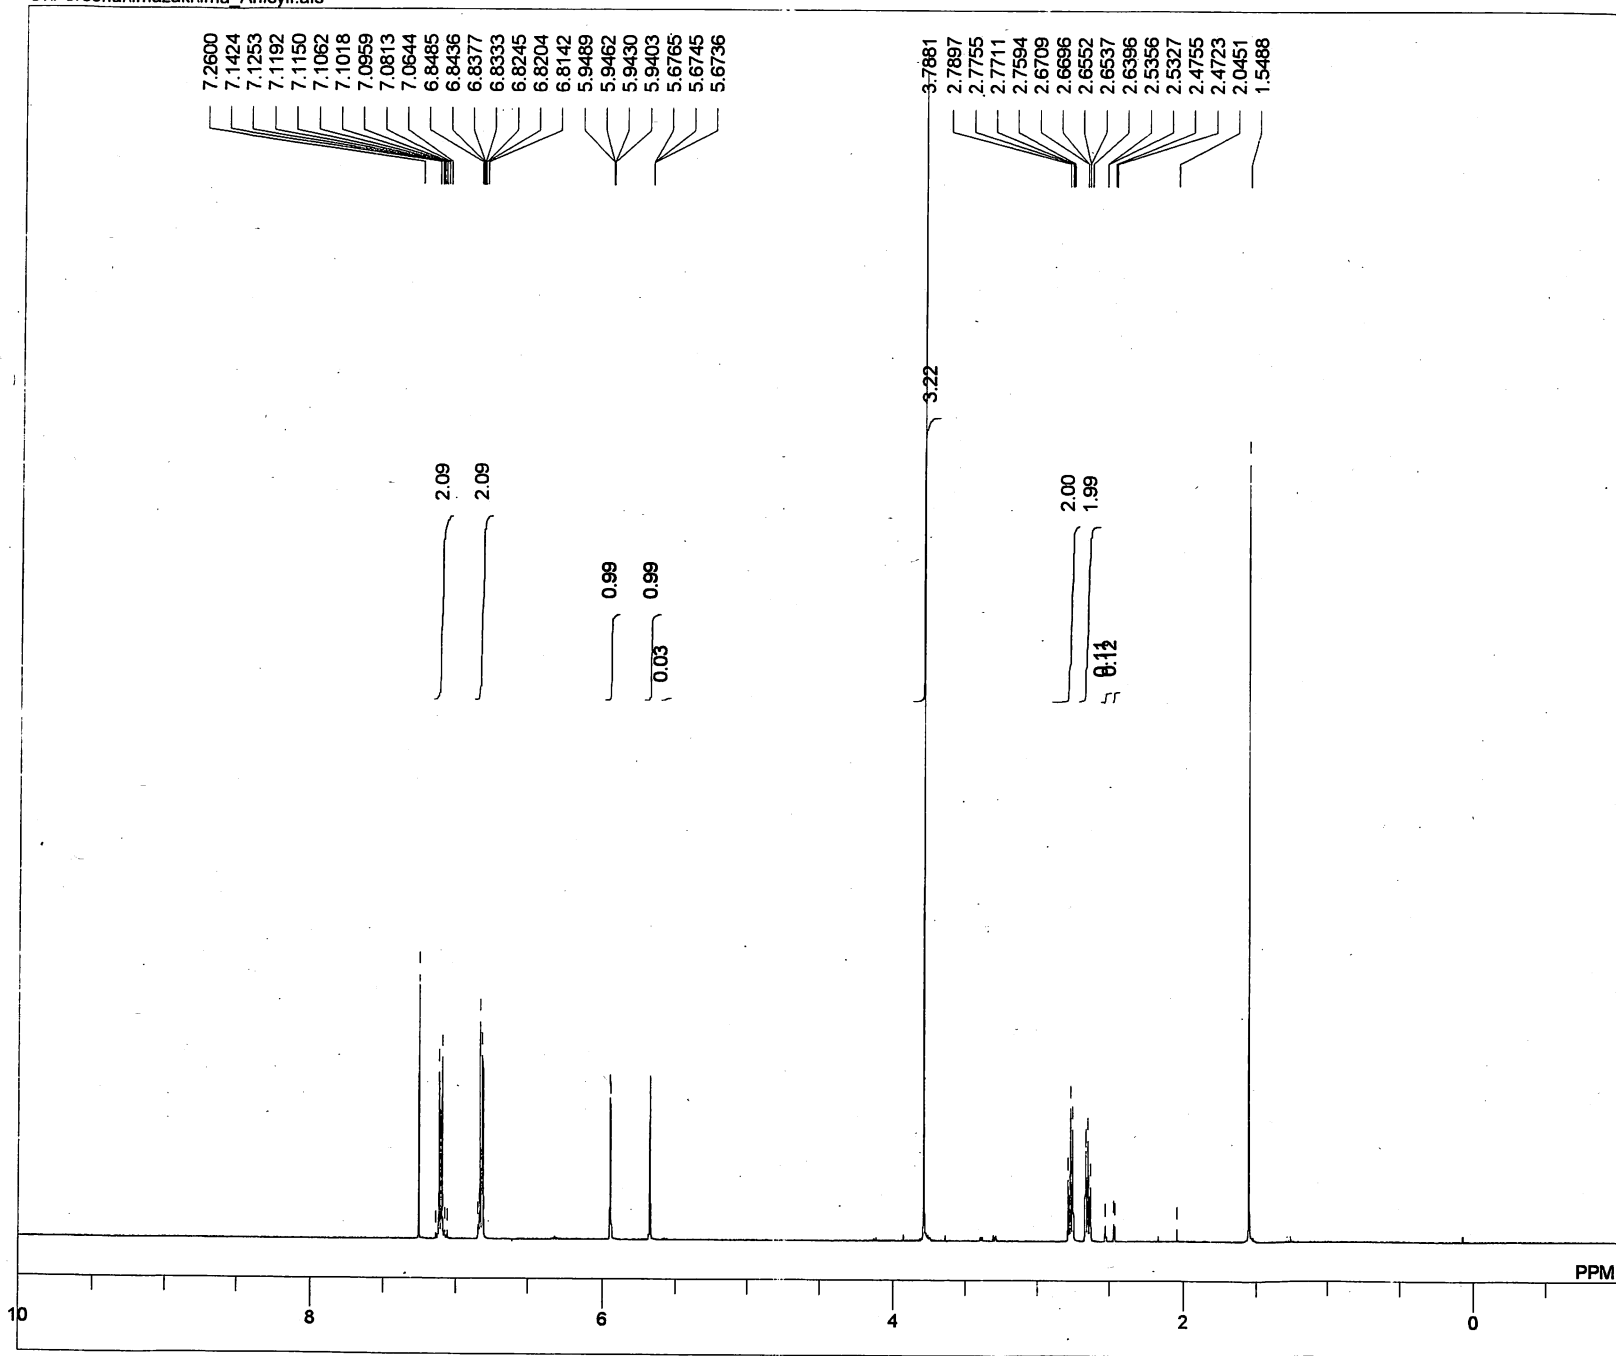

|       |                                               |
|-------|-----------------------------------------------|
| MENUF | 1H                                            |
| OBNUC | 1H                                            |
| OFR   | 499.10 MHz                                    |
| OBSET | 0.00 KHz                                      |
| OBFIN | 128885.00 Hz                                  |
| PW1   | 5.50 usec                                     |
| DEADT | 72.30 usec                                    |
| PREDL | 0.01000 msec                                  |
| IWT   | 1000.0000 msec                                |
| POINT | 65536                                         |
| SPO   | 65536                                         |
| TIMES | 16                                            |
| DUMMY | 0                                             |
| FREQU | 8000.00 Hz                                    |
| FLT   | 4000 Hz                                       |
| DELAY | 50.00 usec                                    |
| ACQTM | 8.1920 sec                                    |
| PD    | 1.0000 sec                                    |
| ADBIT | 16                                            |
| RGAIN | 25                                            |
| BF    | 0.12 Hz                                       |
| T1    | 0.00                                          |
| T2    | 0.00                                          |
| T3    | 90.00                                         |
| T4    | 100.00                                        |
| EXMOD | non                                           |
| EXPCM | single pulse nondecoupling & nonpresaturation |
| IRNUC | 1H                                            |
| IFR   | 499.10 MHz                                    |
| IRSET | 0.00 KHz                                      |
| IRFIN | 128250.00 Hz                                  |
| IRRPW | 50 usec                                       |
| IRATN | 511                                           |
| DFILE | ima_Anisyll.als                               |
| SF    | th5at                                         |
| LKSET | 0.00 KHz                                      |
| LKFIN | 26934.0 Hz                                    |
| LKLEV | 200                                           |
| LGAIN | 19                                            |
| LKPHS | 353                                           |
| LKSIG | 608                                           |
| CSPED | 12 Hz                                         |
| FILDC |                                               |
| FILDF |                                               |
| SLVNT | CDCL3                                         |
| DATIM | Wed Oct 15 15:46:56 2008                      |

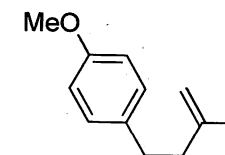

entry 3 of Table 2

C:\WinLambda\COMMON\DEFAULT.ALS

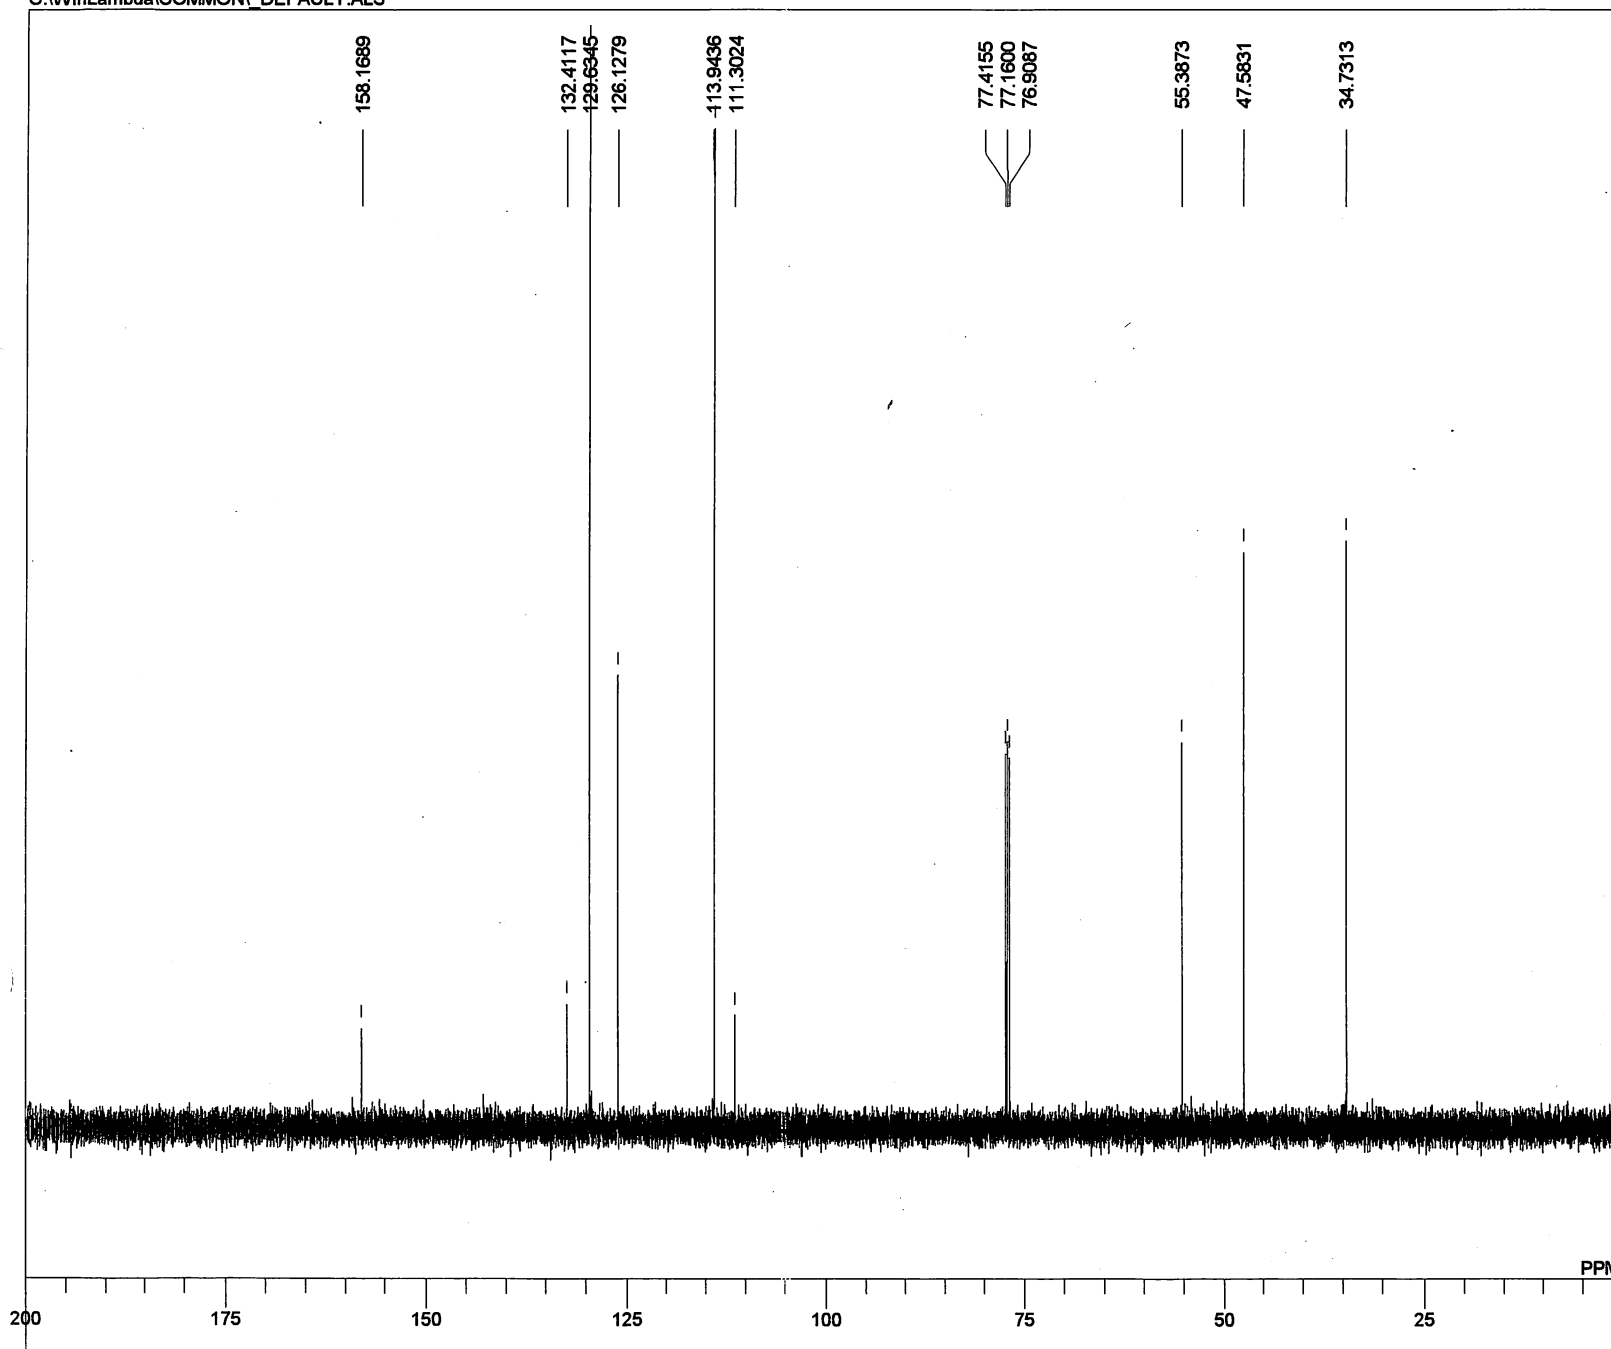

MENUF 13C  
OBNUC 13C  
OFR 125.40 MHz  
OBSET 0.00 KHz  
OBFIN 143041.00 Hz  
PW1 6.25 usec  
DEADT 10.00 usec  
PREDL 0.01000 msec  
IWT 1000.0000 msec  
POINT 65536  
SPO 65536  
TIMES 72  
DUMMY 2  
FREQU 33898.30 Hz  
FLT 16950 Hz  
DELAY 11.80 usec  
ACQTM 1.9333 sec  
PD 1.0670 sec  
ADBIT 16  
RGAIN 30  
BF 0.12 Hz  
T1 0.00  
T2 0.00  
T3 90.00  
T4 100.00  
EXMOD bcm  
EXPCM single pulse with bilevel decoupling  
IRNUC 1H  
IFR 499.10 MHz  
IRSET 0.00 KHz  
IRFIN 128250.00 Hz  
IRRPW 50 usec  
IRATN 511  
DFILE \_DEFAULT.ALS  
SF th5at  
LKSET 0.00 KHz  
LKFIN 26934.0 Hz  
LKLEV 200  
LGAIN 19  
LKPHS 353  
LKSIG 588  
CSPED 11 Hz  
FILDC  
FILDF  
SLVNT CDCL3  
DATIM Wed Oct 15 20:54:36 2008

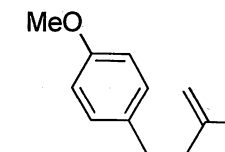

entry 3 of Table 2

C:\WinLambda\COMMON\_DEFAULT.ALS

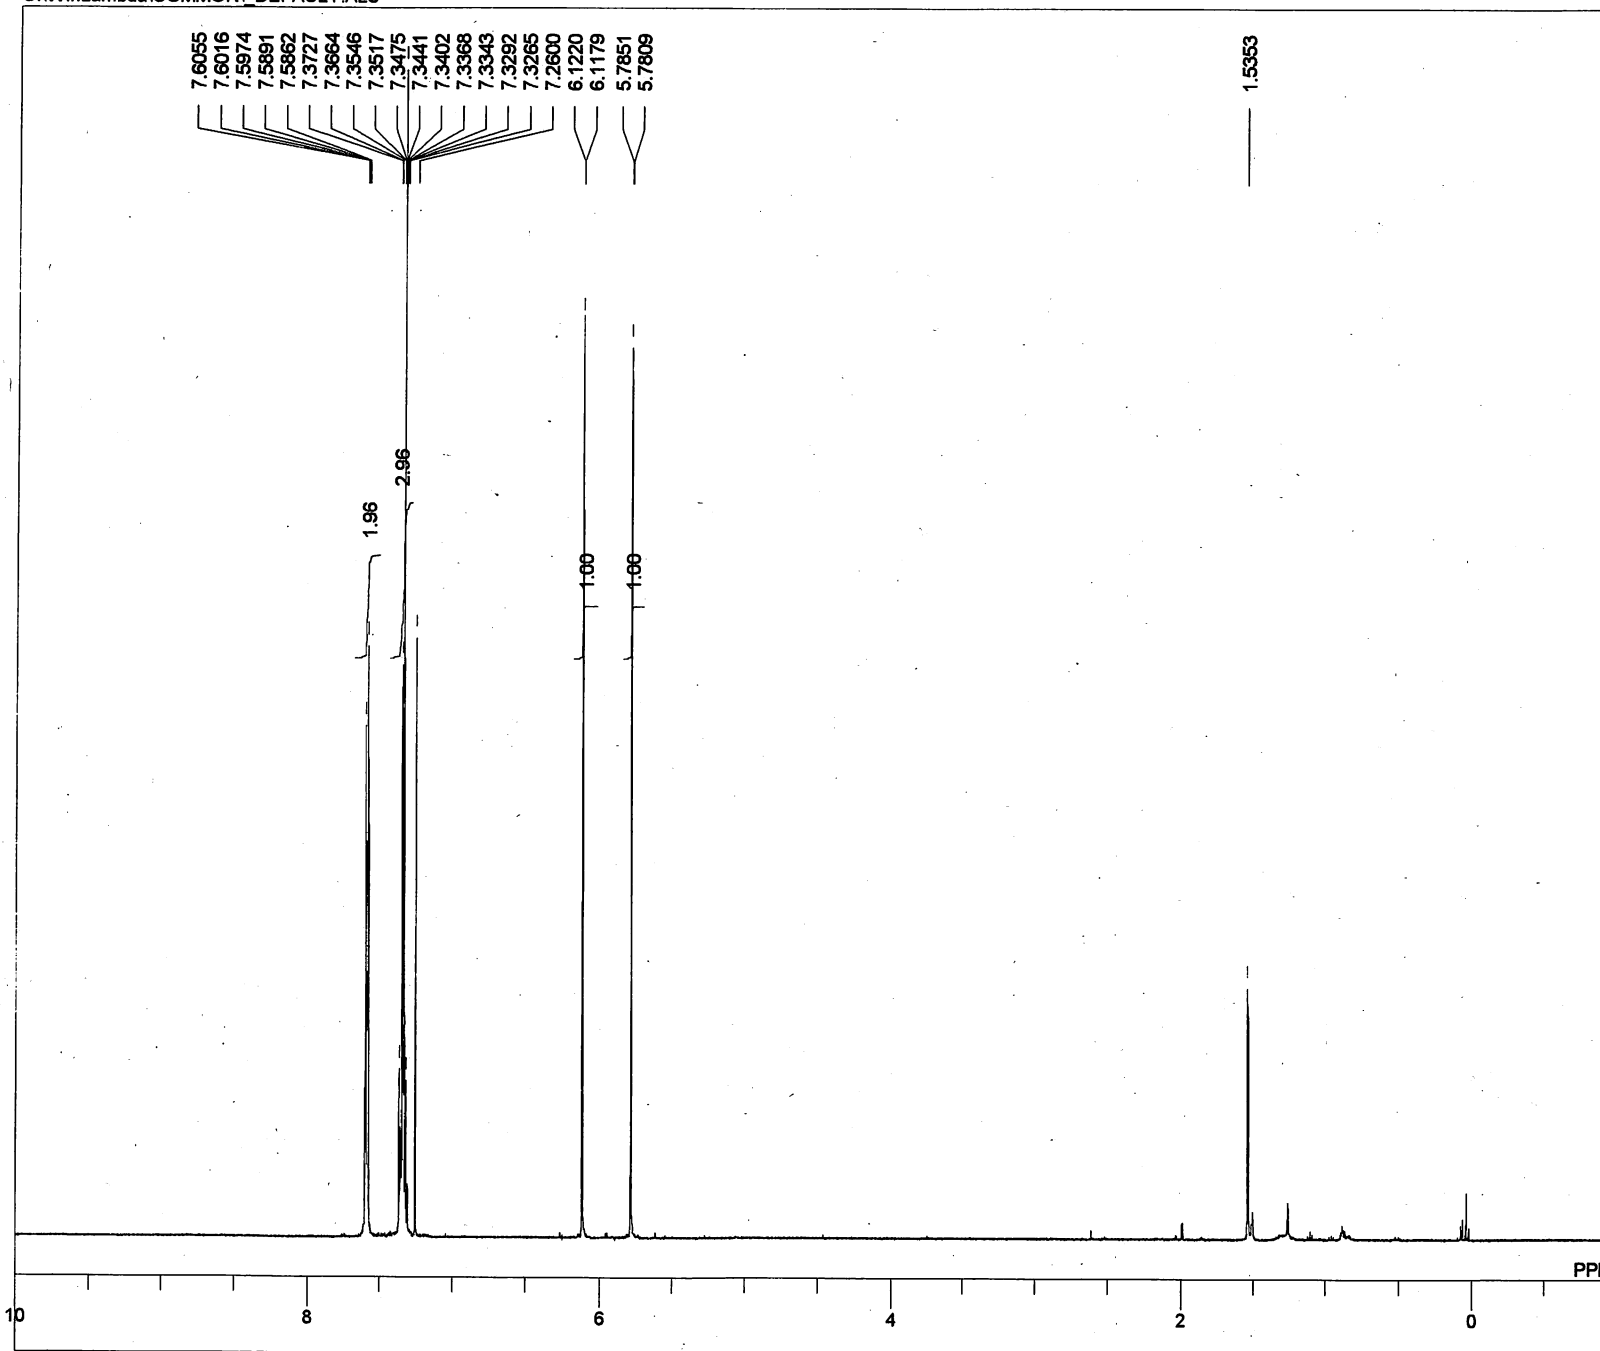

|       |                                               |
|-------|-----------------------------------------------|
| MENUF | 1H                                            |
| OBNUC | 1H                                            |
| OFR   | 499.10 MHz                                    |
| OBSET | 0.00 KHz                                      |
| OBFIN | 128885.00 Hz                                  |
| PW1   | 5.50 usec                                     |
| DEADT | 72.30 usec                                    |
| PREDL | 0.01000 msec                                  |
| IWT   | 1000.0000 msec                                |
| POINT | 65536                                         |
| SPO   | 65536                                         |
| TIMES | 8                                             |
| DUMMY | 0                                             |
| FREQU | 8000.00 Hz                                    |
| FLT   | 4000 Hz                                       |
| DELAY | 50.00 usec                                    |
| ACQTM | 8.1920 sec                                    |
| PD    | 1.0000 sec                                    |
| ADBIT | 16                                            |
| RGAIN | 26                                            |
| BF    | 0.12 Hz                                       |
| T1    | 0.00                                          |
| T2    | 0.00                                          |
| T3    | 90.00                                         |
| T4    | 100.00                                        |
| EXMOD | non                                           |
| EXPCM | single pulse nondecoupling & nonpresaturation |
| IRNUC | 1H                                            |
| IFR   | 499.10 MHz                                    |
| IRSET | 0.00 KHz                                      |
| IRFIN | 128250.00 Hz                                  |
| IRRPW | 50 usec                                       |
| IRATN | 511                                           |
| DFILE | _DEFAULT.ALS                                  |
| SF    | th5at                                         |
| LKSET | 0.00 KHz                                      |
| LKFIN | 26934.0 Hz                                    |
| LKLEV | 200                                           |
| LGAIN | 19                                            |
| LKPHS | 353                                           |
| LKSIG | 621                                           |
| CSPED | 13 Hz                                         |
| FILDC |                                               |
| FILDF |                                               |
| SLVNT | CDCL3                                         |
| DATIM | Wed Nov 19 20:20:51 2008                      |

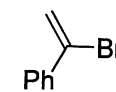

entry 4 of Table 2

C:\WinLambdat\COMMON\_DEFAULT.ALS

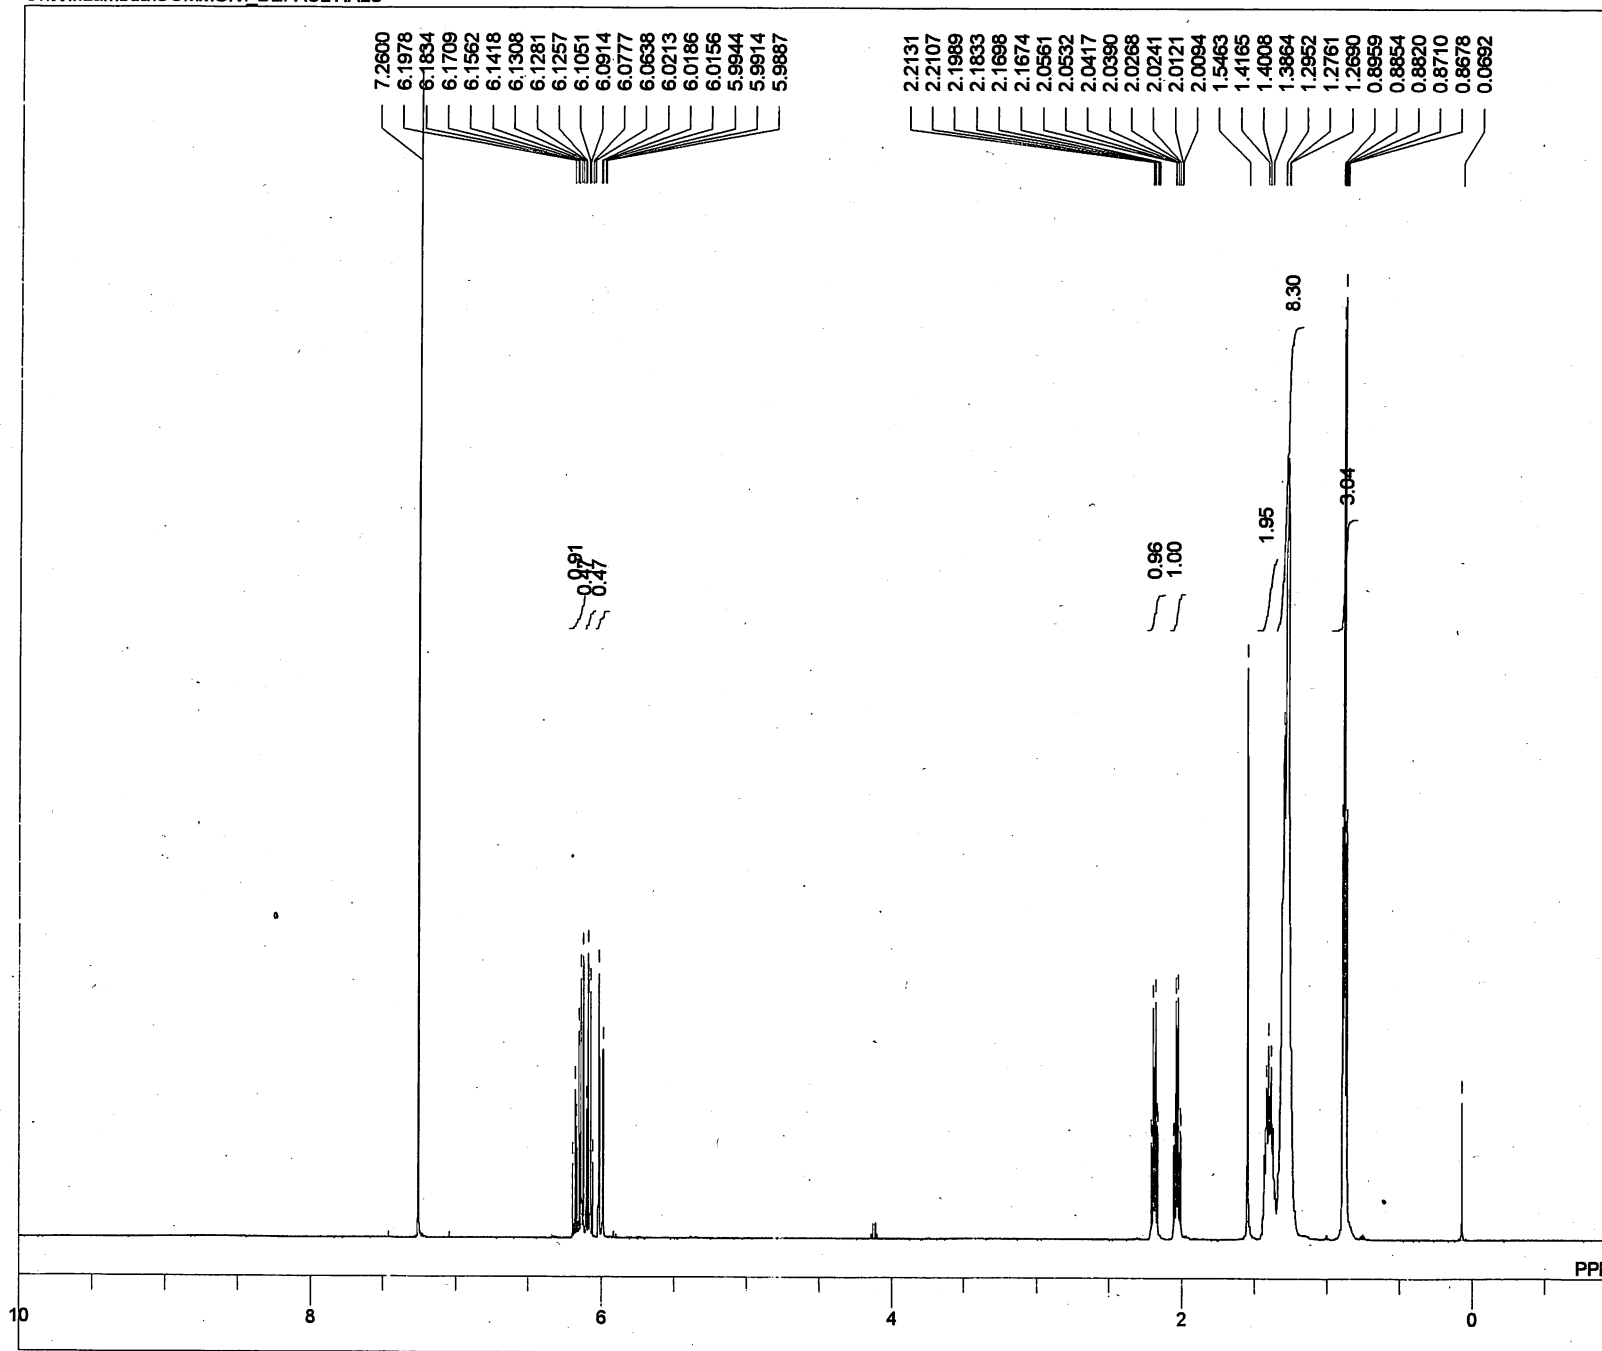

|       |                                               |
|-------|-----------------------------------------------|
| MENUF | 1H                                            |
| OBNUC | 1H                                            |
| OFR   | 499.10 MHz                                    |
| OBSET | 0.00 KHz                                      |
| OBFIN | 128885.00 Hz                                  |
| PW1   | 5.50 usec                                     |
| DEADT | 72.30 usec                                    |
| PREDL | 0.01000 msec                                  |
| IWT   | 1000.0000 msec                                |
| POINT | 65536                                         |
| SPO   | 65536                                         |
| TIMES | 16                                            |
| DUMMY | 0                                             |
| FREQU | 8000.00 Hz                                    |
| FLT   | 4000 Hz                                       |
| DELAY | 50.00 usec                                    |
| ACQTM | 8.1920 sec                                    |
| PD    | 1.0000 sec                                    |
| ADBIT | 16                                            |
| RGAIN | 21                                            |
| BF    | 0.12 Hz                                       |
| T1    | 0.00                                          |
| T2    | 0.00                                          |
| T3    | 90.00                                         |
| T4    | 100.00                                        |
| EXMOD | non                                           |
| EXPCM | single pulse nondecoupling & nonpresaturation |
| IRNUC | 1H                                            |
| IFR   | 499.10 MHz                                    |
| IRSET | 0.00 KHz                                      |
| IRFIN | 128250.00 Hz                                  |
| IRRPW | 50 usec                                       |
| IRATN | 511                                           |
| DFILE | _DEFAULT.ALS                                  |
| SF    | th5at                                         |
| LKSET | 0.00 KHz                                      |
| LKFIN | 26934.0 Hz                                    |
| LKLEV | 200                                           |
| LGAIN | 20                                            |
| LKPHS | 353                                           |
| LKSIG | 720                                           |
| CSPED | 13 Hz                                         |
| FILDC |                                               |
| FILDF |                                               |
| SLVNT | CDCL3                                         |
| DATIM | Mon Oct 27 14:10:35 2008                      |

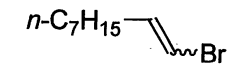

entry 5 of Table 2

C:\WinLambda\COMMON\DEFAULT.ALS

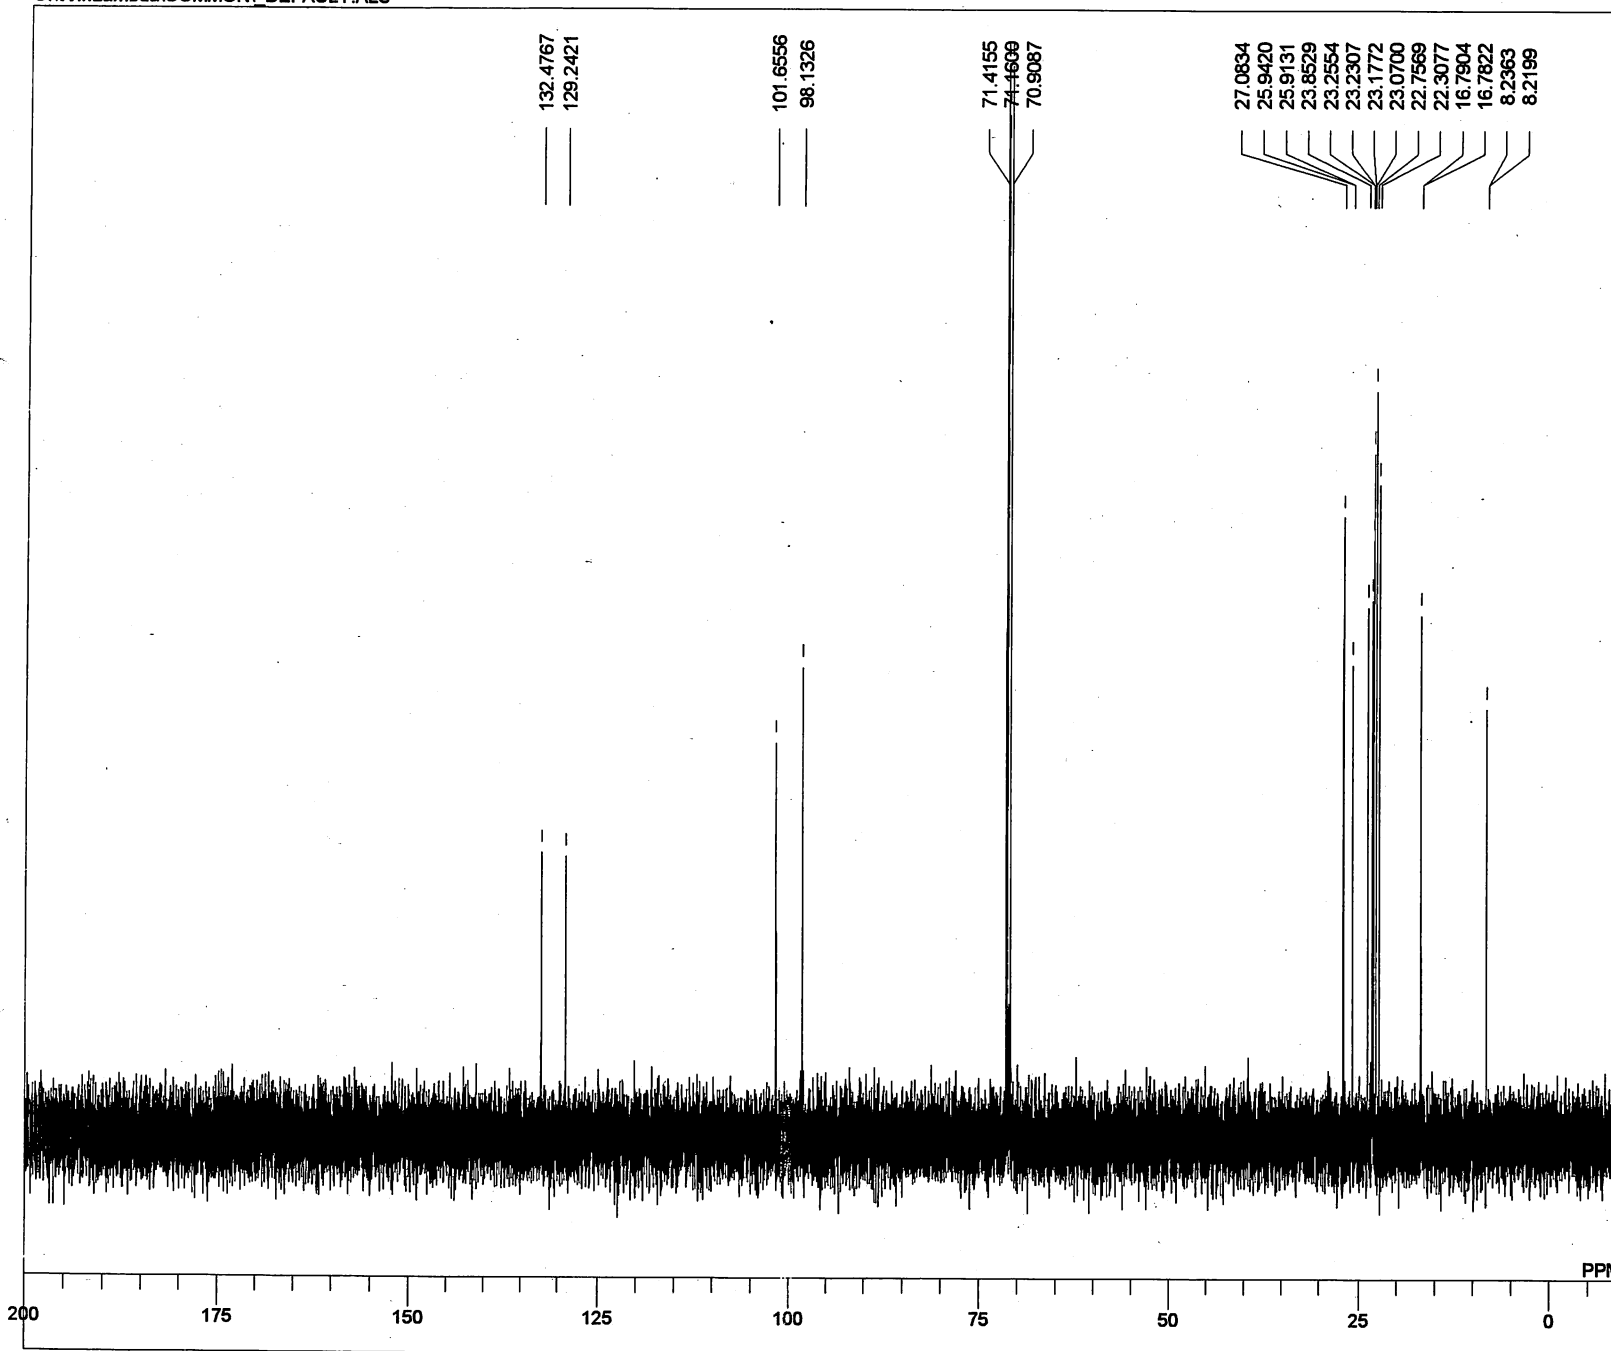

|       |                                      |
|-------|--------------------------------------|
| MENUF | 13C                                  |
| OBNUC | 13C                                  |
| OFR   | 125.40 MHz                           |
| OBSET | 0.00 KHz                             |
| OBFIN | 143041.00 Hz                         |
| PW1   | 6.25 usec                            |
| DEADT | 10.00 usec                           |
| PREDL | 0.01000 msec                         |
| IWT   | 1000.0000 msec                       |
| POINT | 65536                                |
| SPO   | 65536                                |
| TIMES | 144                                  |
| DUMMY | 2                                    |
| FREQU | 33898.30 Hz                          |
| FLT   | 16950 Hz                             |
| DELAY | 11.80 usec                           |
| ACQTM | 1.9333 sec                           |
| PD    | 1.0670 sec                           |
| ADBIT | 16                                   |
| RGAIN | 30                                   |
| BF    | 0.12 Hz                              |
| T1    | 0.00                                 |
| T2    | 0.00                                 |
| T3    | 90.00                                |
| T4    | 100.00                               |
| EXMOD | bcm                                  |
| EXPCM | single pulse with bilevel decoupling |
| IRNUC | 1H                                   |
| IFR   | 499.10 MHz                           |
| IRSET | 0.00 KHz                             |
| IRFIN | 128250.00 Hz                         |
| IRRPW | 50 usec                              |
| IRATN | 511                                  |
| DFILE | _DEFAULT.ALS                         |
| SF    | th5at                                |
| LKSET | 0.00 KHz                             |
| LKFIN | 26934.0 Hz                           |
| LKLEV | 200                                  |
| LGAIN | 20                                   |
| LKPHS | 353                                  |
| LKSIG | 592                                  |
| CSPED | 11 Hz                                |
| FILDC |                                      |
| FILDF |                                      |
| SLVNT | CDCL3                                |
| DATIM | Mon Oct 27 14:25:04 2008             |

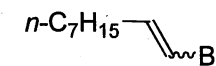

entry 5 of Table 2

C:\WinLambda\COMMON\DEFAULT.ALS

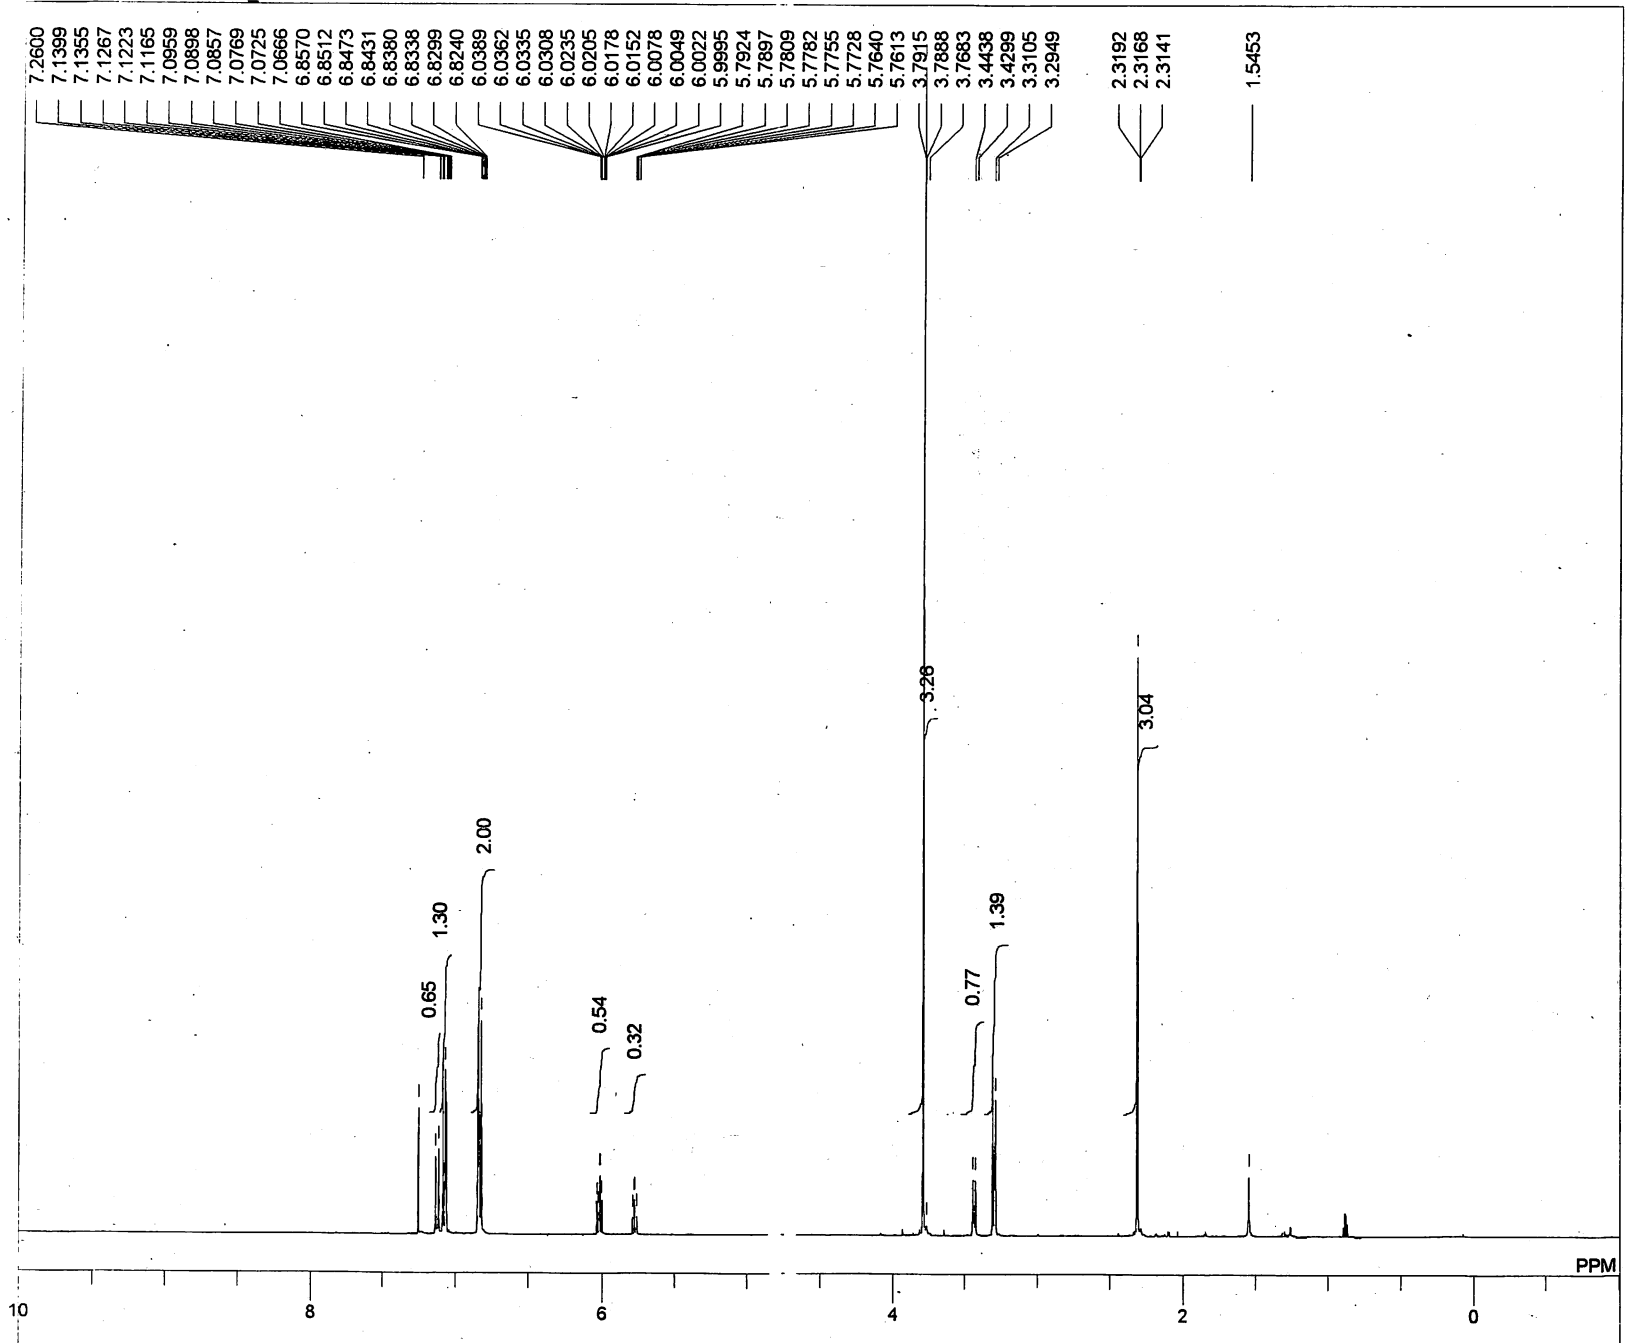

```

MENUMF 1H
OBNUC 1H
OFR 499.10 MHz
OBSET 0.00 KHz
OBFIN 128885.00 Hz
PW1 5.50 usec
DEADT 72.30 usec
PREDL 0.01000 msec
IWT 1000.0000 msec
POINT 65536
SPO 65536
TIMES 16
DUMMY 0
FREQU 8000.00 Hz
FLT 4000 Hz
DELAY 50.00 usec
ACQTM 8.1920 sec
PD 1.0000 sec
ADBIT 16
RGAIN 25
BF 0.12 Hz
T1 0.00
T2 0.00
T3 90.00
T4 100.00
EXMOD non
EXPCM single pulse nondecoupling & nonpresaturation
IRNUC 1H
IFR 499.10 MHz
IRSET 0.00 KHz
IRFIN 128250.00 Hz
IRRPW 50 usec
IRATN 511
DFILE _DEFAULT.ALS
SF th5at
LKSET 0.00 KHz
LKFIN 26934.0 Hz
LKLEV 200
LGAIN 20
LKPHS 353
LKSIG 708
CSPED 10 Hz
FILDC
FILDF
SLVNT CDCL3
DATIM Thu Mar 19 12:32:31 2009
    
```

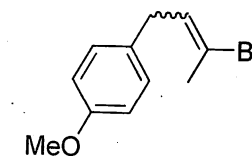

entry 6 of Table 2

ima08058\_13C

C:\WinLambda\COMMON\DEFAULT.ALS

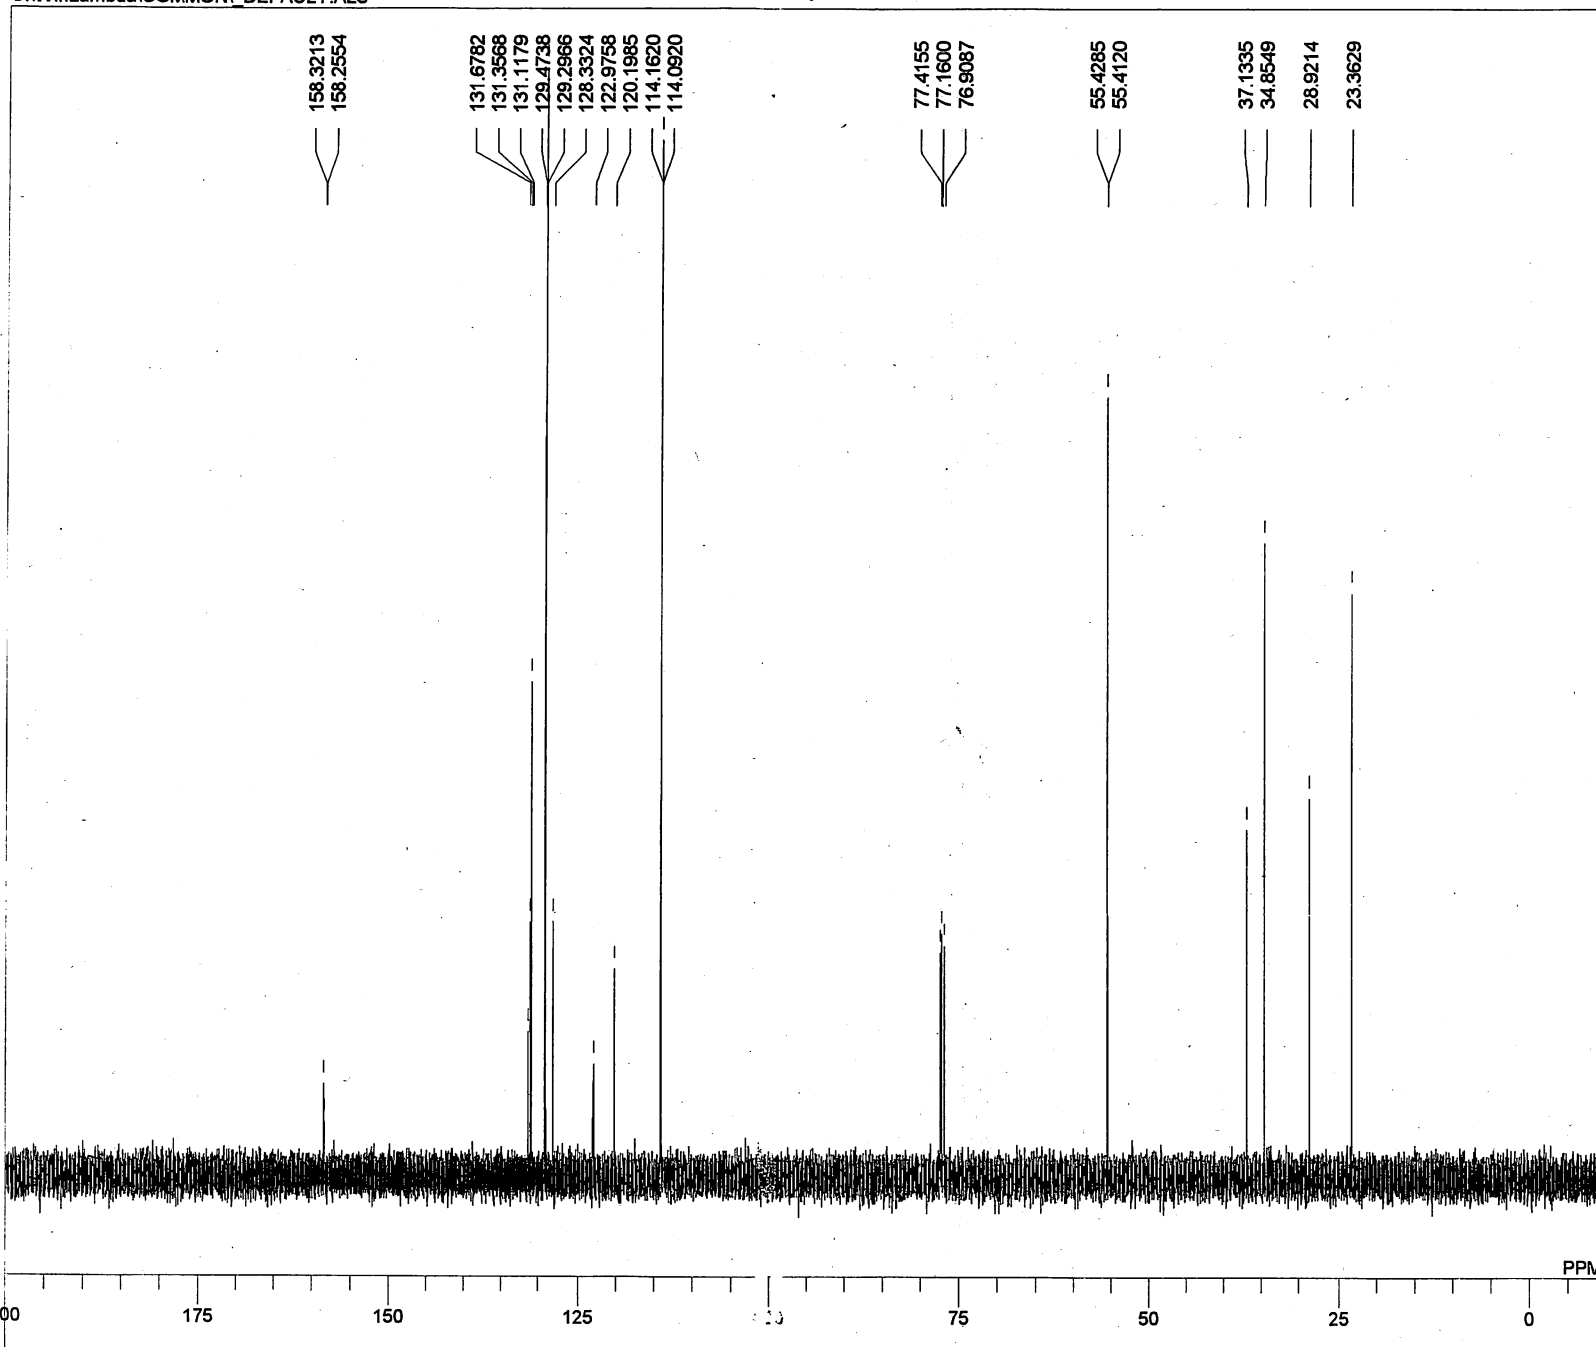

MENUF 13C  
OBNUC 13C  
OFR 125.40 MHz  
OBSET 0.00 KHz  
OBFIN 143041.00 Hz  
PW1 6.25 usec  
DEADT 10.00 usec  
PREDL 0.01000 msec  
IWT 1000.0000 msec  
POINT 65536  
SPO 65536  
TIMES 72  
DUMMY 2  
FREQU 33898.30 Hz  
FLT 16950 Hz  
DELAY 11.80 usec  
ACQTM 1.9333 sec  
PD 1.0670 sec  
ADBIT 16  
RGAIN 30  
BF 0.12 Hz  
T1 0.00  
T2 0.00  
T3 90.00  
T4 100.00  
EXMOD bcm  
EXPCM single pulse with bilevel decoupling  
IRNUC 1H  
IFR 499.10 MHz  
IRSET 0.00 KHz  
IRFIN 128250.00 Hz  
IRRPW 50 usec  
IRATN 511  
DFILE \_DEFAULT.ALS  
SF th5at  
LKSET 0.00 KHz  
LKFIN 26934.0 Hz  
LKLEV 200  
LGAIN 20  
LKPHS 353  
LKSIG 648  
CSPED 13 Hz  
FILDC  
FILDF  
SLVNT CDCL3  
DATIM Thu Mar 19 15:28:56 2009

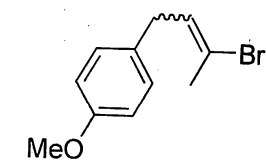

entry 6 of Table 2

C:\WinLambda\COMMON\DEFAULT.ALS

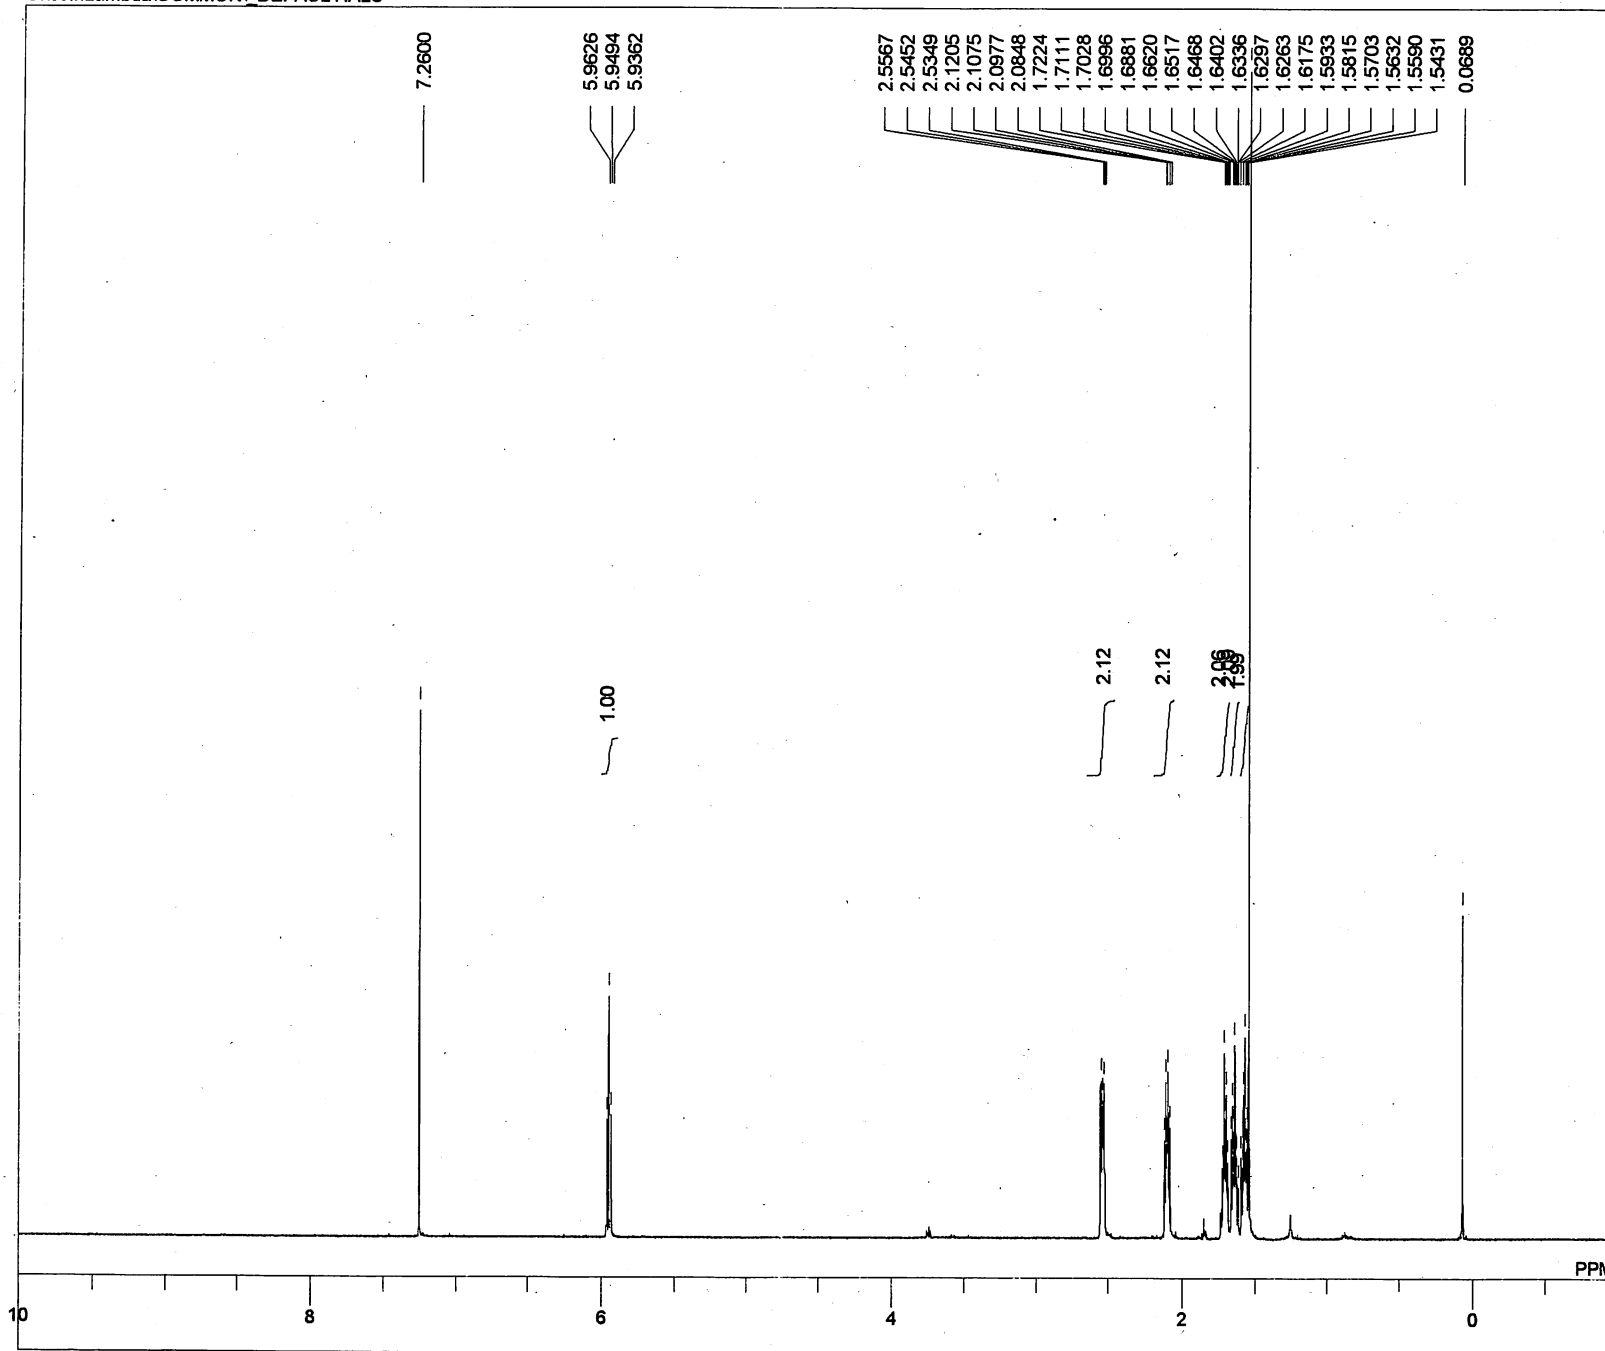

|       |                                               |
|-------|-----------------------------------------------|
| MENUF | 1H                                            |
| OBNUC | 1H                                            |
| OFR   | 499.10 MHz                                    |
| OBSET | 0.00 KHz                                      |
| OBFIN | 128885.00 Hz                                  |
| PW1   | 5.50 usec                                     |
| DEADT | 72.30 usec                                    |
| PREDL | 0.01000 msec                                  |
| IWT   | 1000.0000 msec                                |
| POINT | 65536                                         |
| SPO   | 65536                                         |
| TIMES | 8                                             |
| DUMMY | 0                                             |
| FREQU | 8000.00 Hz                                    |
| FLT   | 4000 Hz                                       |
| DELAY | 50.00 usec                                    |
| ACQTM | 8.1920 sec                                    |
| PD    | 1.0000 sec                                    |
| ADBIT | 16                                            |
| RGAIN | 26                                            |
| BF    | 0.12 Hz                                       |
| T1    | 0.00                                          |
| T2    | 0.00                                          |
| T3    | 90.00                                         |
| T4    | 100.00                                        |
| EXMOD | non                                           |
| EXPCM | single pulse nondecoupling & nonpresaturation |
| IRNUC | 1H                                            |
| IFR   | 499.10 MHz                                    |
| IRSET | 0.00 KHz                                      |
| IRFIN | 128250.00 Hz                                  |
| IRRPW | 50 usec                                       |
| IRATN | 511                                           |
| DFILE | _DEFAULT.ALS                                  |
| SF    | th5at                                         |
| LKSET | 0.00 KHz                                      |
| LKFIN | 26934.0 Hz                                    |
| LKLEV | 200                                           |
| LGAIN | 19                                            |
| LKPHS | 353                                           |
| LKSIG | 594                                           |
| CSPED | 13 Hz                                         |
| FILDC |                                               |
| FILDF |                                               |
| SLVNT | CDCL3                                         |
| DATIM | Tue Nov 11 19:15:09 2008                      |

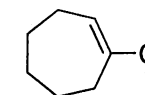

entry 7 of Table 2



ima07013

C:\WinLambda\COMMON\DEFAULT.ALS

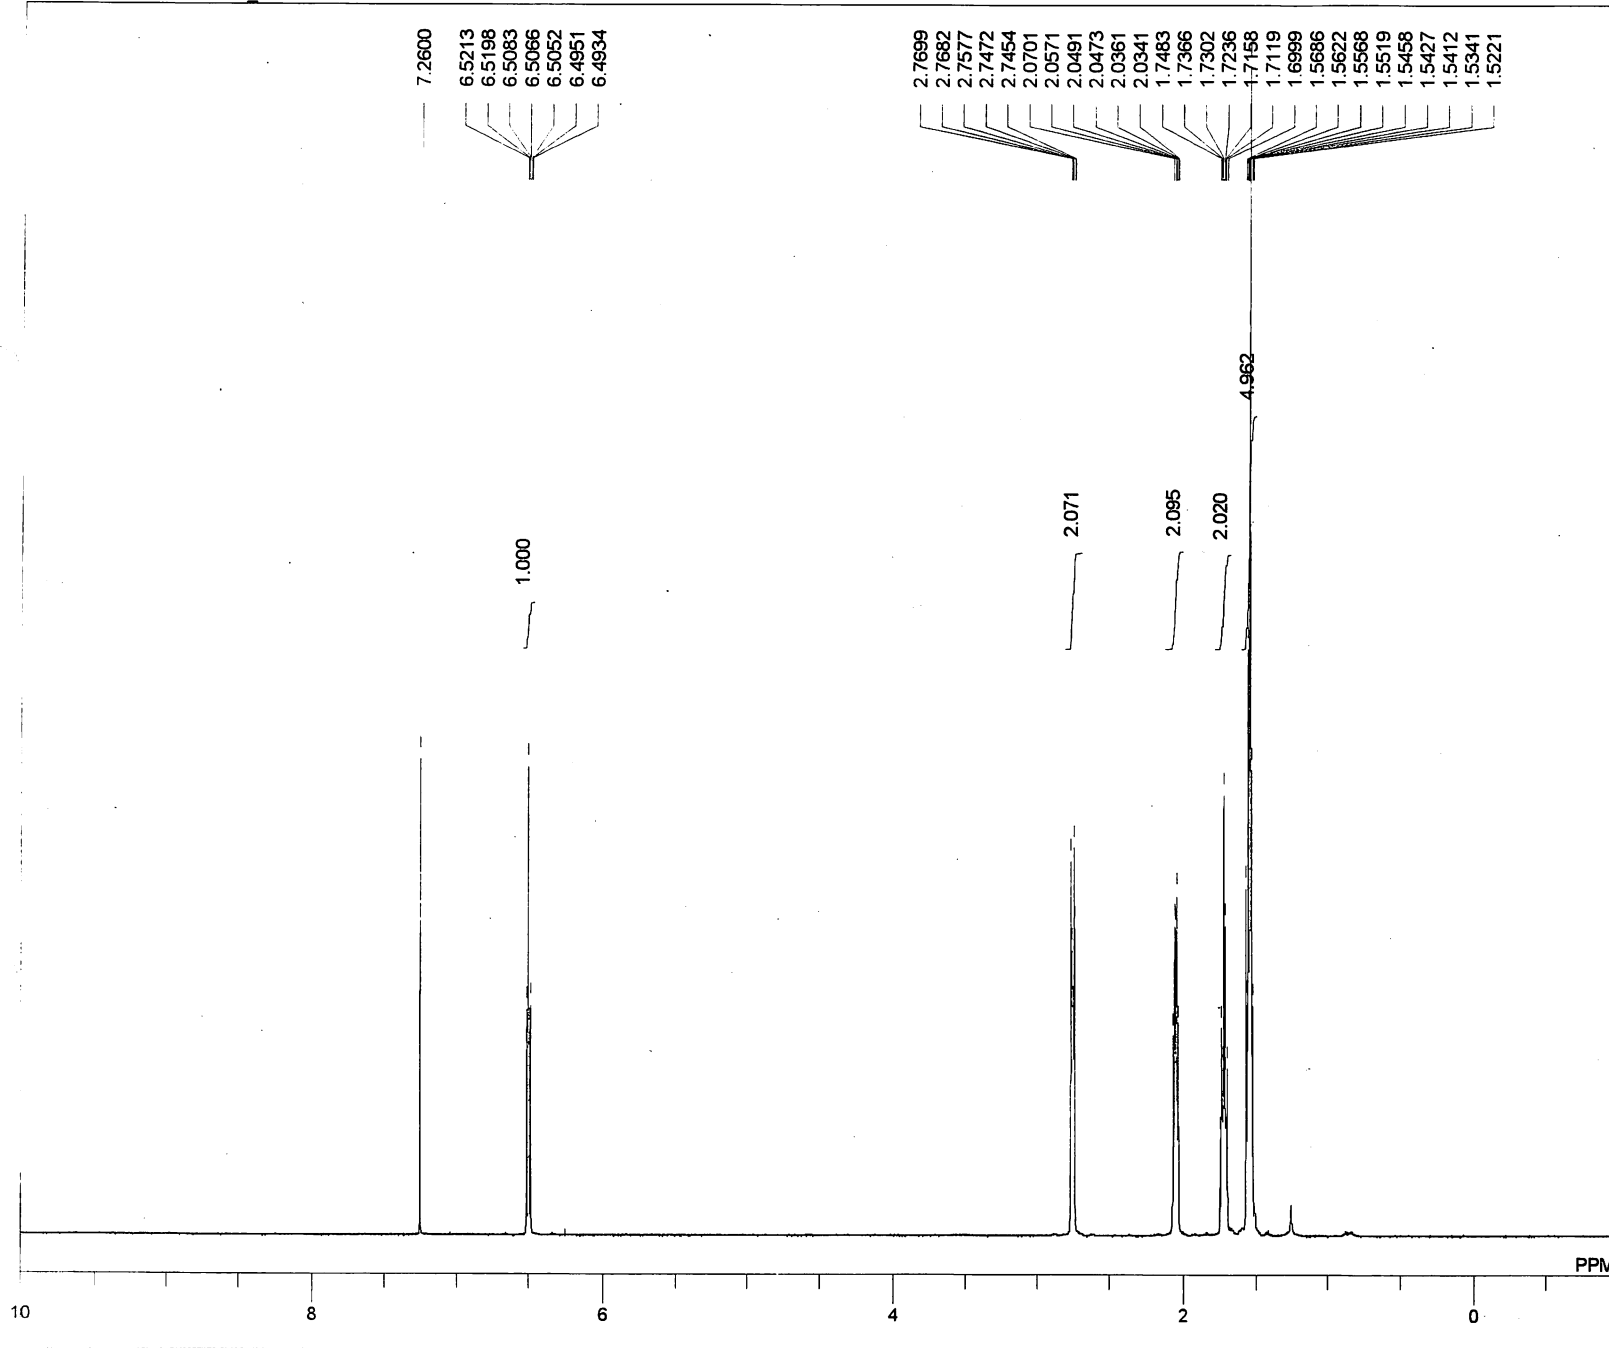

|       |                                               |
|-------|-----------------------------------------------|
| MENUF | 1H                                            |
| OBNUC | 1H                                            |
| OFR   | 499.10 MHz                                    |
| OBSET | 0.00 KHz                                      |
| OBFIN | 128885.00 Hz                                  |
| PW1   | 5.50 usec                                     |
| DEADT | 72.30 usec                                    |
| PREDL | 0.01000 msec                                  |
| IWT   | 1000.0000 msec                                |
| POINT | 65536                                         |
| SPO   | 65536                                         |
| TIMES | 16                                            |
| DUMMY | 0                                             |
| FREQU | 8000.00 Hz                                    |
| FLT   | 4000 Hz                                       |
| DELAY | 50.00 usec                                    |
| ACQTM | 8.1920 sec                                    |
| PD    | 1.0000 sec                                    |
| ADBIT | 16                                            |
| RGAIN | 25                                            |
| BF    | 0.12 Hz                                       |
| T1    | 0.00                                          |
| T2    | 0.00                                          |
| T3    | 90.00                                         |
| T4    | 100.00                                        |
| EXMOD | non                                           |
| EXPCM | single pulse nondecoupling & nonpresaturation |
| IRNUC | 1H                                            |
| IFR   | 499.10 MHz                                    |
| IRSET | 0.00 KHz                                      |
| IRFIN | 128250.00 Hz                                  |
| IRRPW | 50 usec                                       |
| IRATN | 511                                           |
| DFILE | _DEFAULT.ALS                                  |
| SF    | th5at                                         |
| LKSET | 0.00 KHz                                      |
| LKFIN | 26934.0 Hz                                    |
| LKLEV | 200                                           |
| LGAIN | 20                                            |
| LKPHS | 353                                           |
| LKSIG | 711                                           |
| CSPED | 11 Hz                                         |
| FILDC |                                               |
| FILDF |                                               |
| SLVNT | CDCL3                                         |
| DATIM | Thu Sep 25 10:30:21 2008                      |

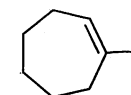

entry 8 of Table 2

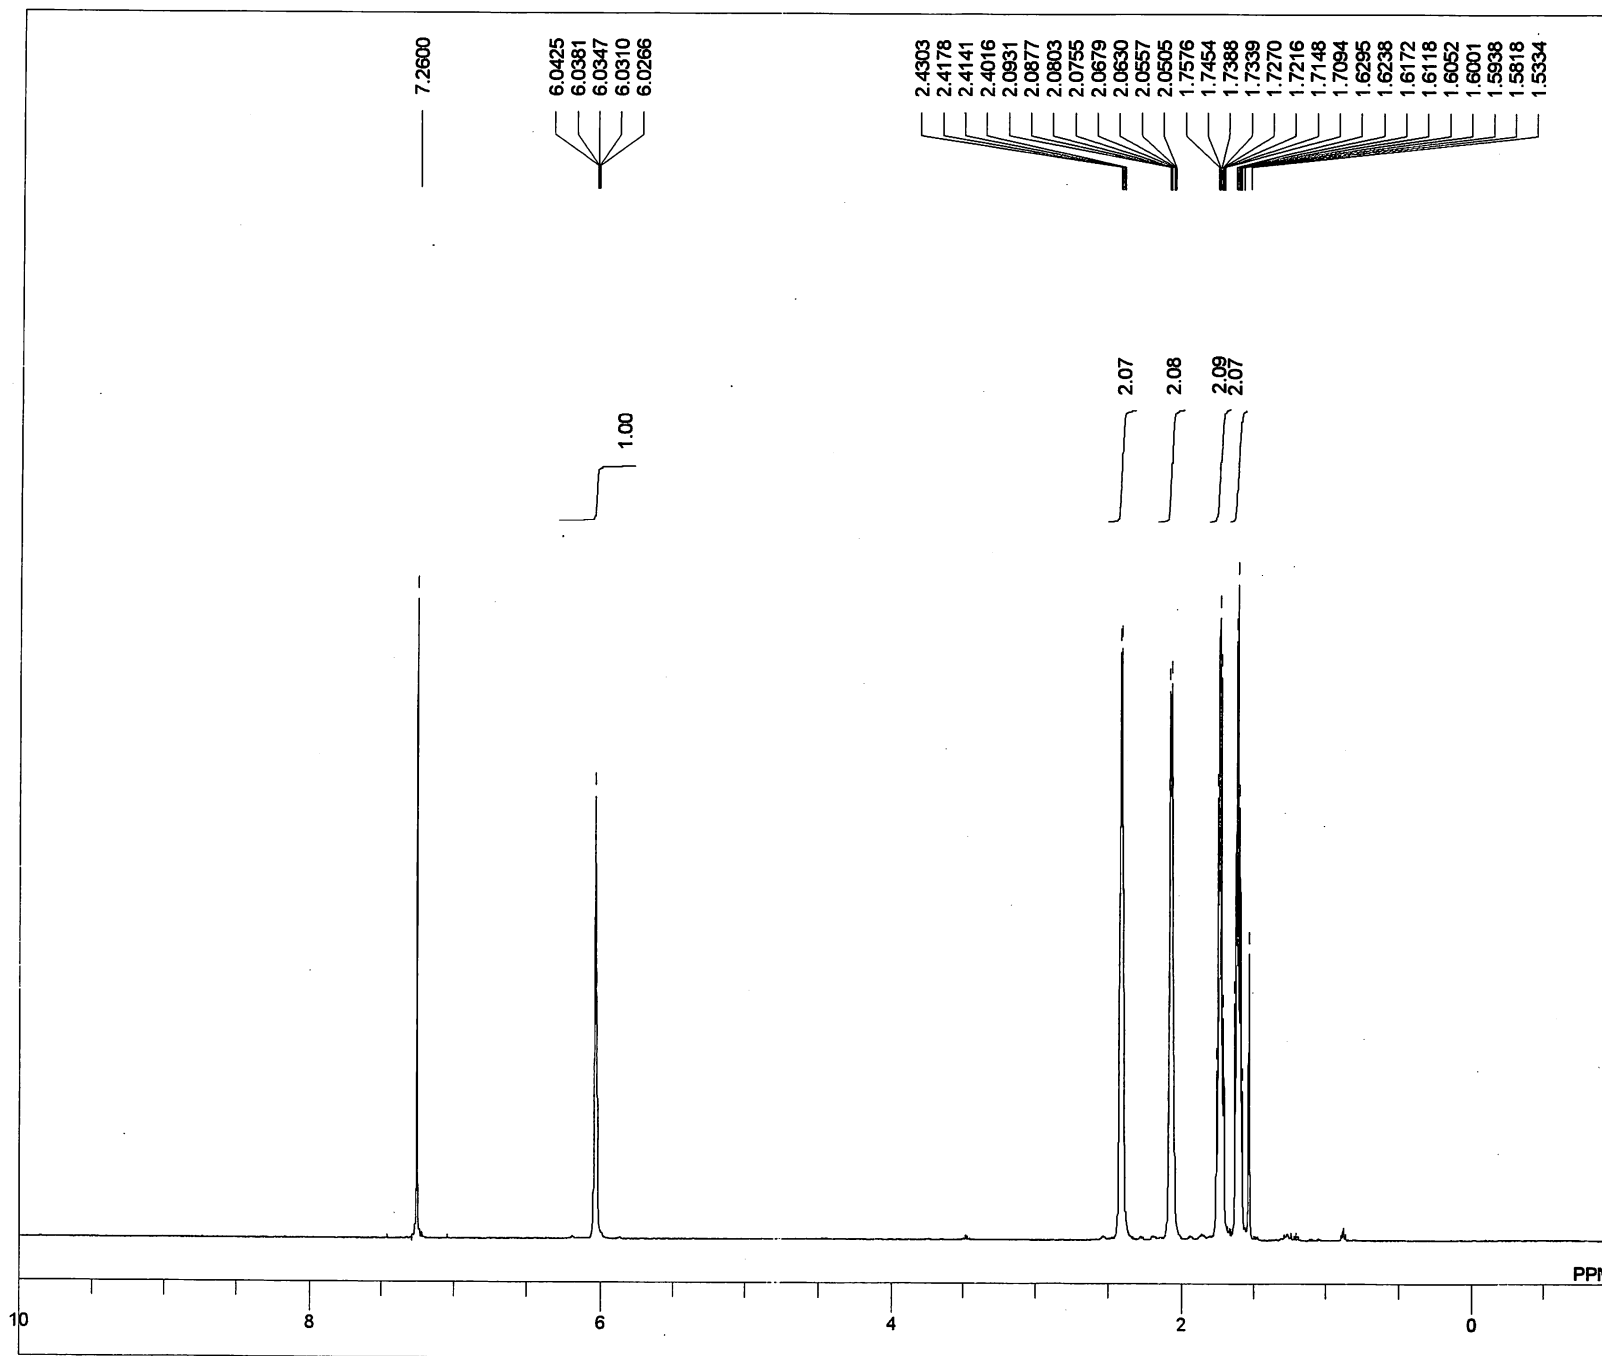

|       |                                               |
|-------|-----------------------------------------------|
| MENUF | 1H                                            |
| OBNUC | 1H                                            |
| OFR   | 499.10 MHz                                    |
| OBSET | 0.00 KHz                                      |
| OBFIN | 128885.00 Hz                                  |
| PW1   | 5.50 usec                                     |
| DEADT | 72.30 usec                                    |
| PREDL | 0.01000 msec                                  |
| IWT   | 1000.0000 msec                                |
| POINT | 65536                                         |
| SPO   | 65536                                         |
| TIMES | 8                                             |
| DUMMY | 0                                             |
| FREQU | 8000.00 Hz                                    |
| FLT   | 4000 Hz                                       |
| DELAY | 50.00 usec                                    |
| ACQTM | 8.1920 sec                                    |
| PD    | 1.0000 sec                                    |
| ADBIT | 16                                            |
| RGAIN | 24                                            |
| BF    | 1.20 Hz                                       |
| T1    | 0.00                                          |
| T2    | 0.00                                          |
| T3    | 90.00                                         |
| T4    | 100.00                                        |
| EXMOD | non                                           |
| EXPCM | single pulse nondecoupling & nonpresaturation |
| IRNUC | 1H                                            |
| IFR   | 499.10 MHz                                    |
| IRSET | 0.00 KHz                                      |
| IRFIN | 128250.00 Hz                                  |
| IRRPW | 50 usec                                       |
| IRATN | 511                                           |
| DFILE | ima04072dist.als                              |
| SF    | th5at                                         |
| LKSET | 0.00 KHz                                      |
| LKFIN | 26934.0 Hz                                    |
| LKLEV | 200                                           |
| LGAIN | 20                                            |
| LKPHS | 353                                           |
| LKSIG | 758                                           |
| CSPED | 16 Hz                                         |
| FILDC |                                               |
| FILDF |                                               |
| SLVNT | CDCL3                                         |
| DATIM | Wed Mar 05 10:38:50 2008                      |

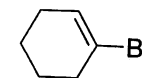

entry 9 of Table 2

ima07075\_1H

C:\Personal\imazaki\ima07075\_1H.als

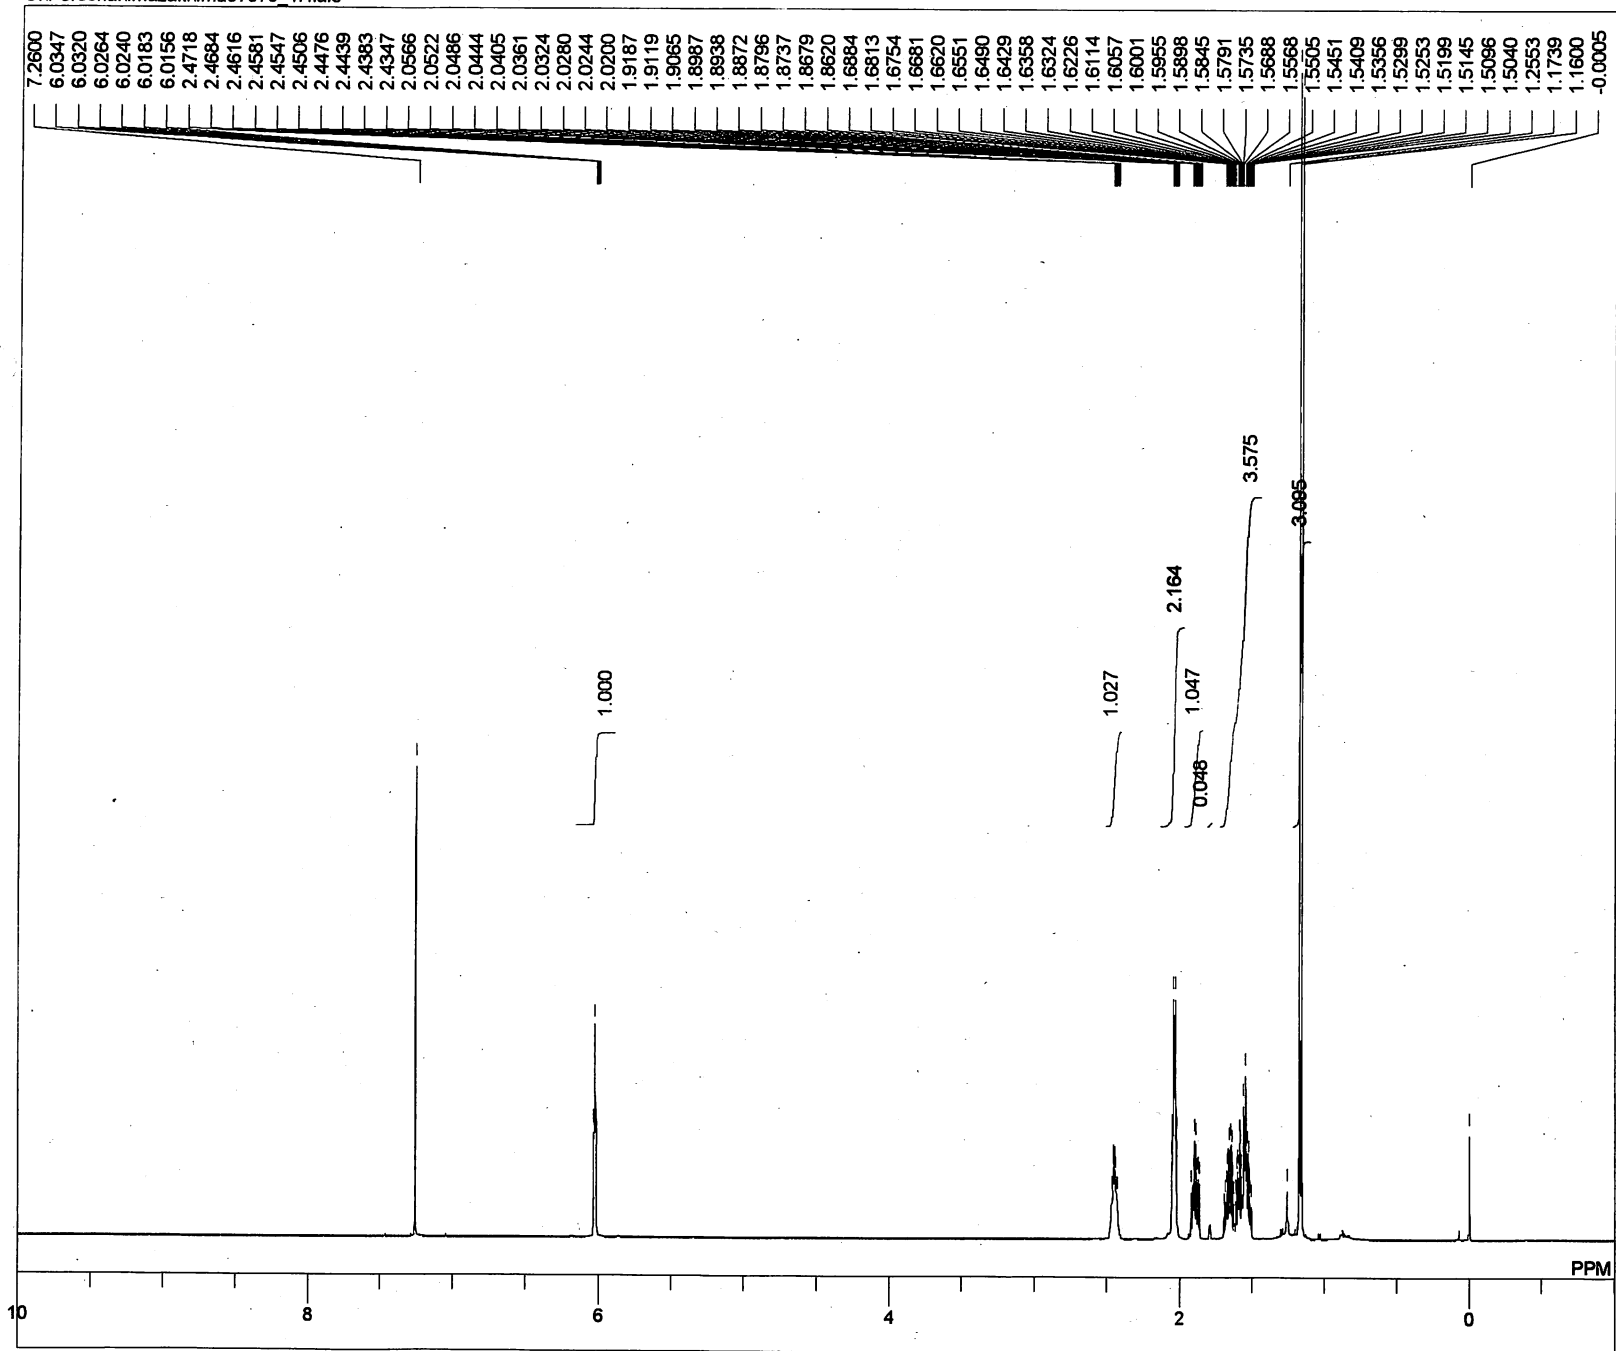

|       |                                               |
|-------|-----------------------------------------------|
| MENUF | 1H                                            |
| OBNUC | 1H                                            |
| OFR   | 499.10 MHz                                    |
| OBSET | 0.00 KHz                                      |
| OBFIN | 128885.00 Hz                                  |
| PW1   | 5.50 usec                                     |
| DEADT | 72.30 usec                                    |
| PREDL | 0.01000 msec                                  |
| IWT   | 1000.0000 msec                                |
| POINT | 65536                                         |
| SPO   | 65536                                         |
| TIMES | 8                                             |
| DUMMY | 0                                             |
| FREQU | 8000.00 Hz                                    |
| FLT   | 4000 Hz                                       |
| DELAY | 50.00 usec                                    |
| ACQTM | 8.1920 sec                                    |
| PD    | 1.0000 sec                                    |
| ADBIT | 16                                            |
| RGAIN | 21                                            |
| BF    | 0.12 Hz                                       |
| T1    | 0.00                                          |
| T2    | 0.00                                          |
| T3    | 90.00                                         |
| T4    | 100.00                                        |
| EXMOD | non                                           |
| EXPCM | single pulse nondecoupling & nonpresaturation |
| IRNUC | 1H                                            |
| IFR   | 499.10 MHz                                    |
| IRSET | 0.00 KHz                                      |
| IRFIN | 128250.00 Hz                                  |
| IRRPW | 50 usec                                       |
| IRATN | 511                                           |
| DFILE | ima07075_1H.als                               |
| SF    | th5at                                         |
| LKSET | 0.00 KHz                                      |
| LKFIN | 26934.0 Hz                                    |
| LKLEV | 200                                           |
| LGAIN | 19                                            |
| LKPHS | 353                                           |
| LKSIG | 583                                           |
| CSPED | 13 Hz                                         |
| FILDC |                                               |
| FILDF |                                               |
| SLVNT | CDCL3                                         |
| DATIM | Fri Dec 05 13:39:28 2008                      |

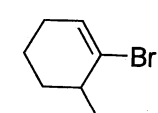

entry 10 of Table 2

ima07072\_1H

C:\WinLambda\COMMON\DEFAULT.ALS

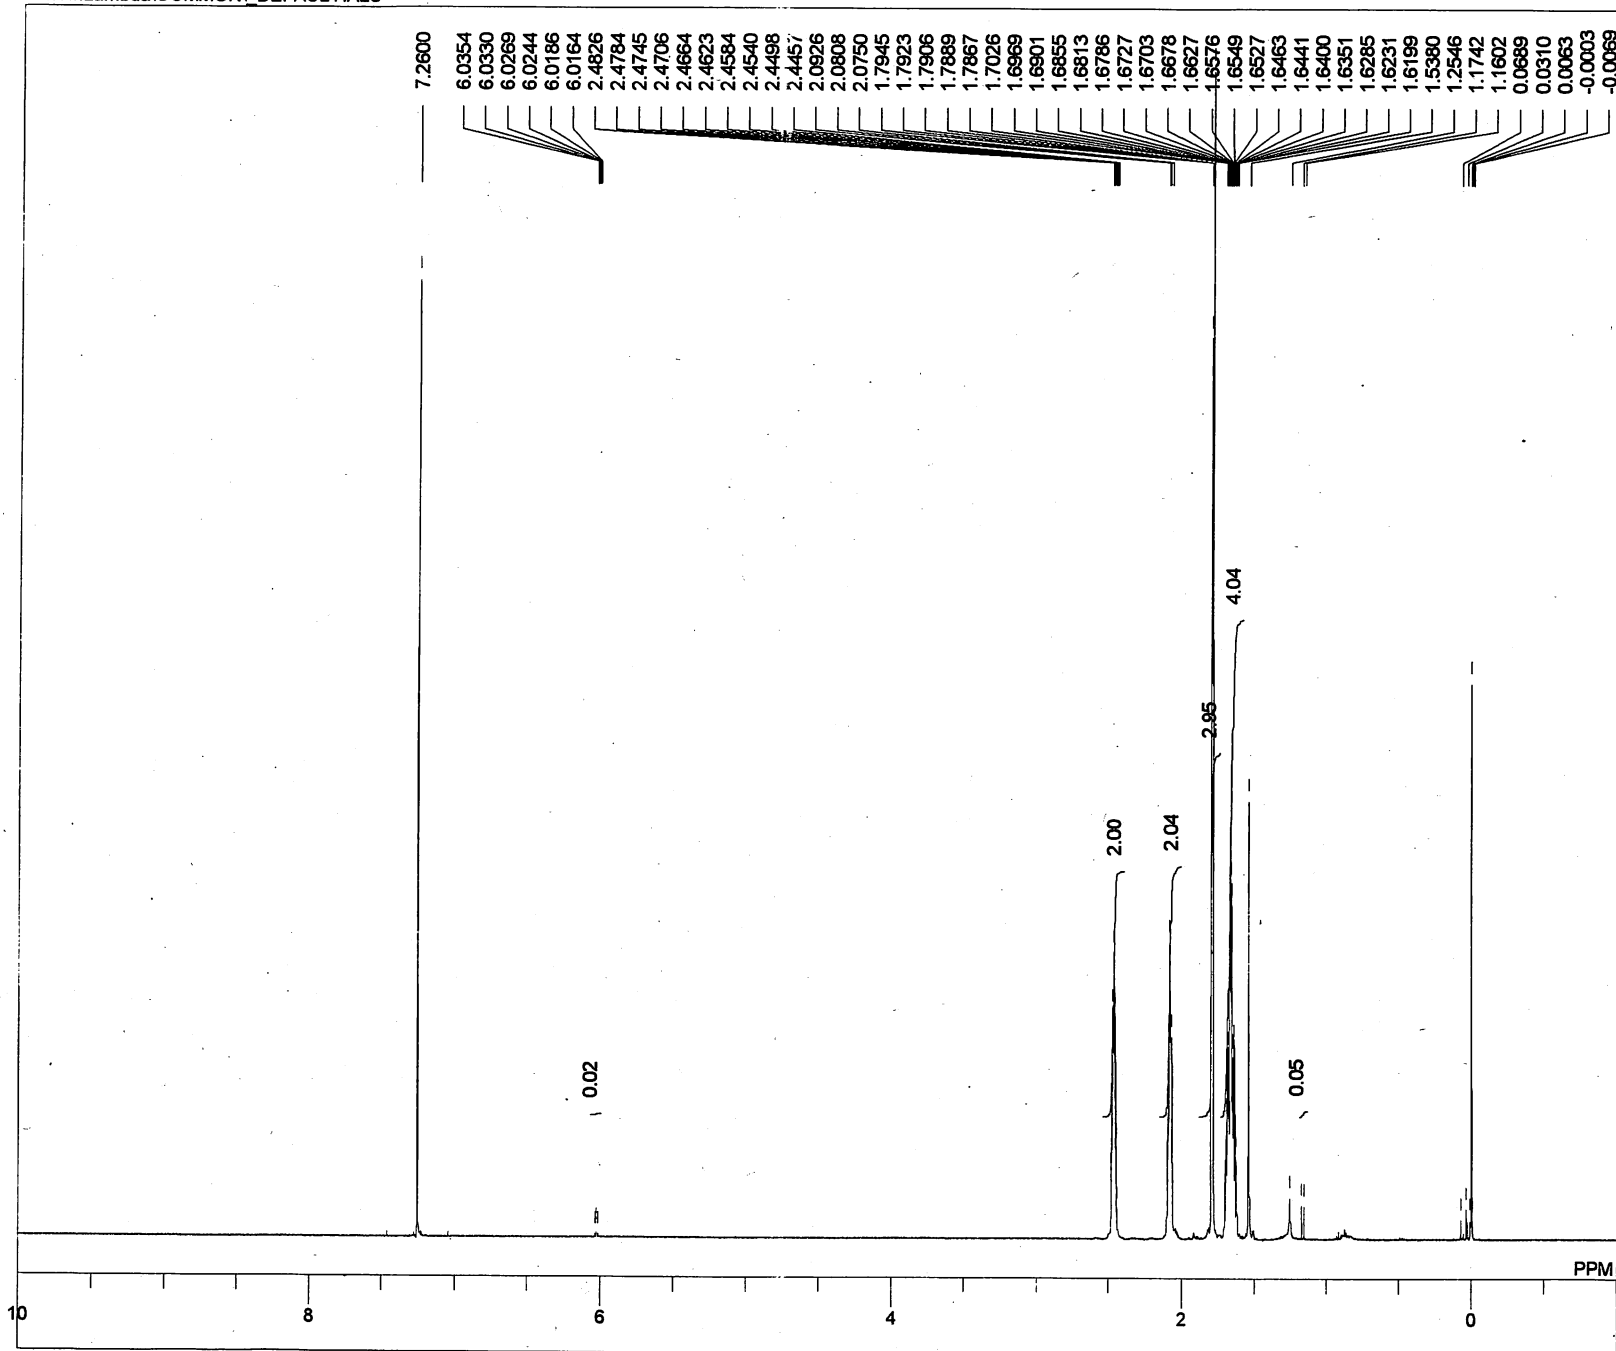

|       |                                               |
|-------|-----------------------------------------------|
| MENUF | 1H                                            |
| OBNUC | 1H                                            |
| OFR   | 499.10 MHz                                    |
| OBSET | 0.00 KHz                                      |
| OBFIN | 128885.00 Hz                                  |
| PW1   | 5.50 usec                                     |
| DEAST | 72.30 usec                                    |
| PREL  | 0.01000 msec                                  |
| IWT   | 1000.0000 msec                                |
| POINT | 65536                                         |
| SPO   | 65536                                         |
| TIMES | 8                                             |
| DUMMY | 0                                             |
| FREQU | 8000.00 Hz                                    |
| FLT   | 4000 Hz                                       |
| DELAY | 50.00 usec                                    |
| ACQTM | 8.1920 sec                                    |
| PD    | 1.0000 sec                                    |
| ADBIT | 16                                            |
| RGAIN | 23                                            |
| BF    | 0.12 Hz                                       |
| T1    | 0.00                                          |
| T2    | 0.00                                          |
| T3    | 90.00                                         |
| T4    | 100.00                                        |
| EXMOD | non                                           |
| EXPCM | single pulse nondecoupling & nonpresaturation |
| IRNUC | 1H                                            |
| IFR   | 499.10 MHz                                    |
| IRSET | 0.00 KHz                                      |
| IRFIN | 128250.00 Hz                                  |
| IRRPW | 50 usec                                       |
| IRATN | 511                                           |
| DFILE | DEFAULT.ALS                                   |
| SF    | th5at                                         |
| LKSET | 0.00 KHz                                      |
| LKFIN | 26934.0 Hz                                    |
| LKLEV | 200                                           |
| LGAIN | 19                                            |
| LKPHS | 353                                           |
| LKSIG | 603                                           |
| CSPED | 11 Hz                                         |
| FILDC |                                               |
| FILDF |                                               |
| SLVNT | CDCL3                                         |
| DATIM | Fri Dec 05 22:16:47 2008                      |

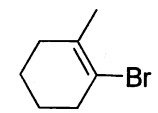

entry 11 of Table 2

ima07069-4

C:\Personal\imazaki\ima07069-4.als

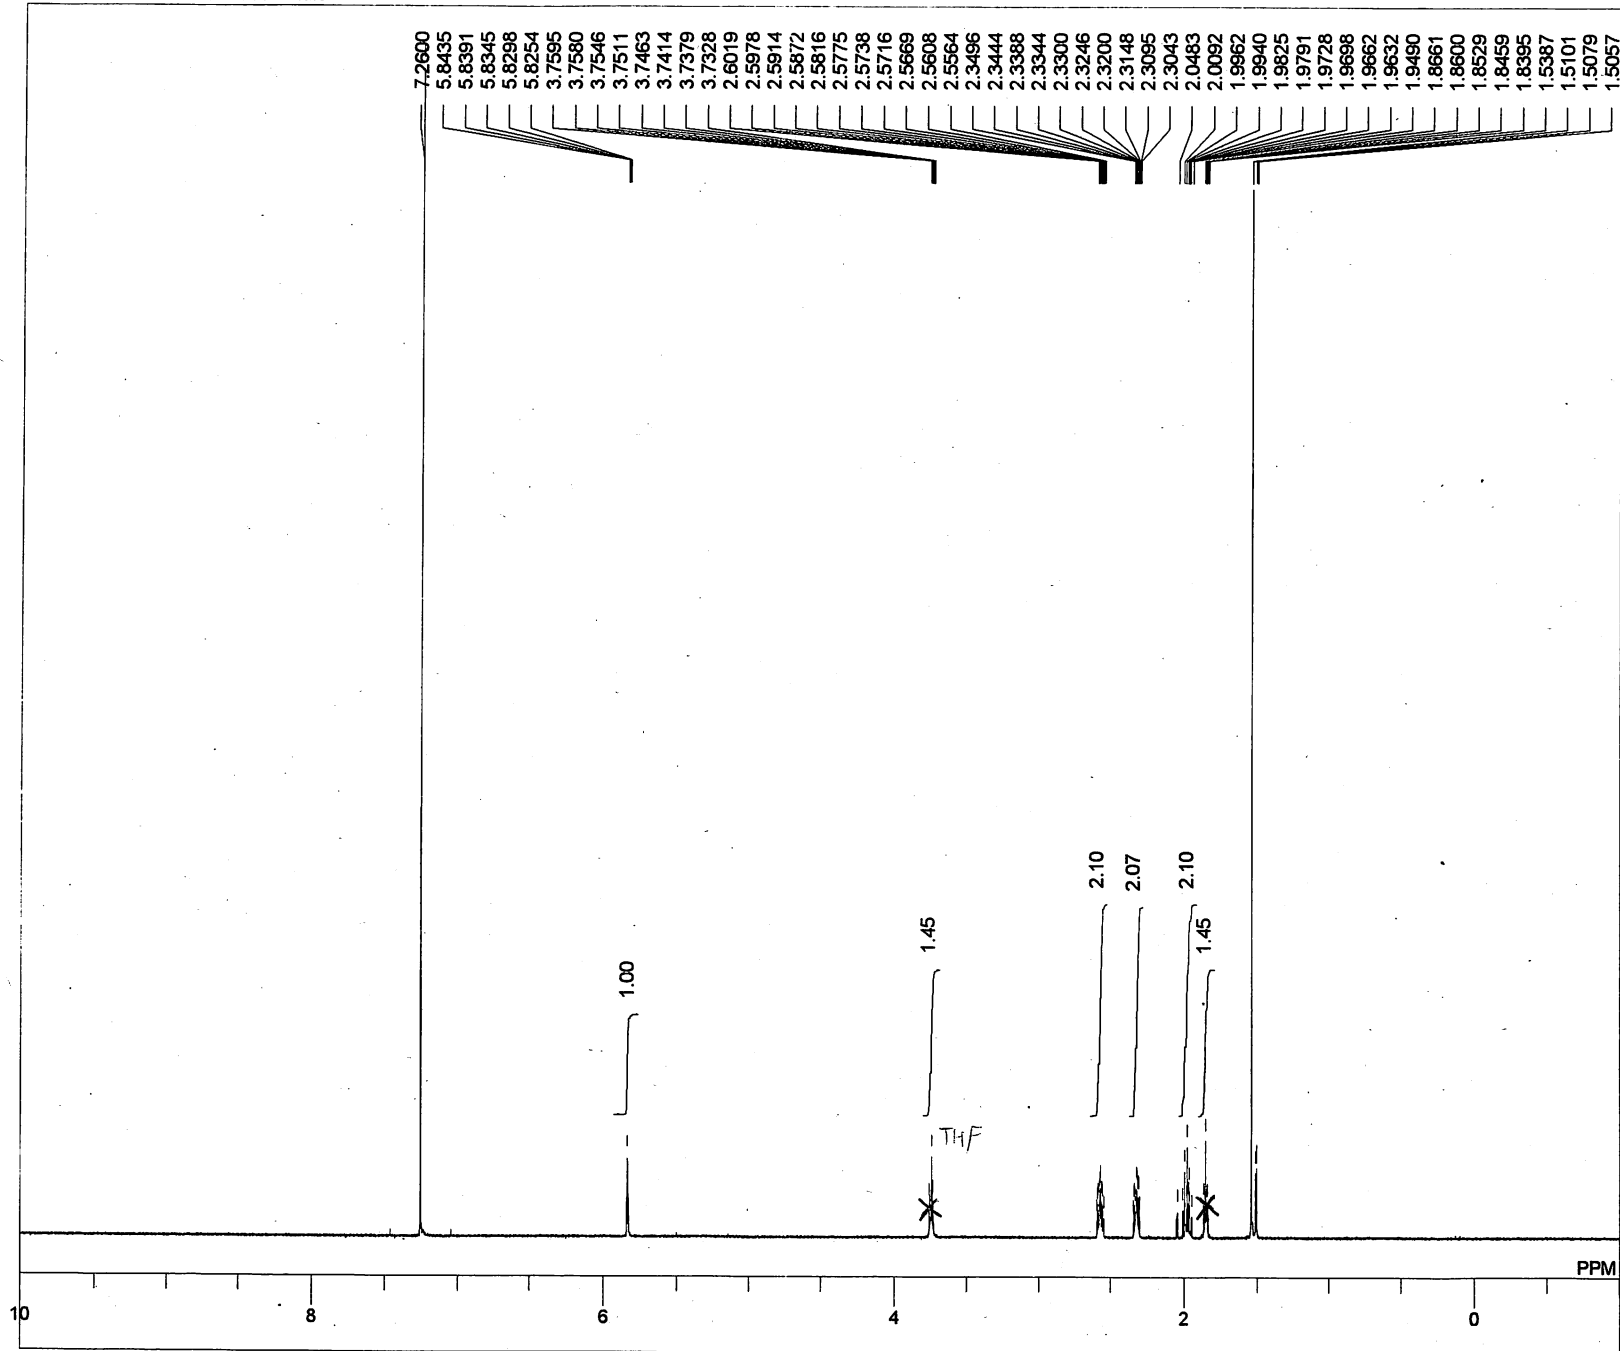

```

MENUF 1H
OBNUC 1H
OFR 499.10 MHz
OBSET 0.00 KHz
OBFIN 128885.00 Hz
PW1 5.50 usec
DEADT 72.30 usec
PREDL 0.01000 msec
IWT 1000.0000 msec
POINT 65536
SPO 65536
TIMES 8
DUMMY 0
FREQU 8000.00 Hz
FLT 4000 Hz
DELTA 50.00 usec
ACQTM 8.1920 sec
PD 1.0000 sec
ADBIT 16
RGAIN 32
BF 0.12 Hz
T1 0.00
T2 0.00
T3 90.00
T4 100.00
EXMOD non
EXPCM single pulse nondecoupling & nonpresaturation
IRNUC 1H
IFR 499.10 MHz
IRSET 0.00 KHz
IRFIN 128250.00 Hz
IRRPW 50 usec
IRATN 511
DFILE ima07069-4.als
SF th5at
LKSET 0.00 KHz
LKFIN 26934.0 Hz
LKLEV 200
LGAIN 19
LKPHS 353
LKSIG 655
CSPED 14 Hz
FILDC
FILDF
SLVNT CDCL3
DATIM Thu Nov 27 19:15:50 2008
    
```

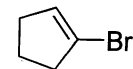

entry 12 of Table 2

ima07046ptlc

C:\WinLambda\COMMON\ DEFAULT.ALS

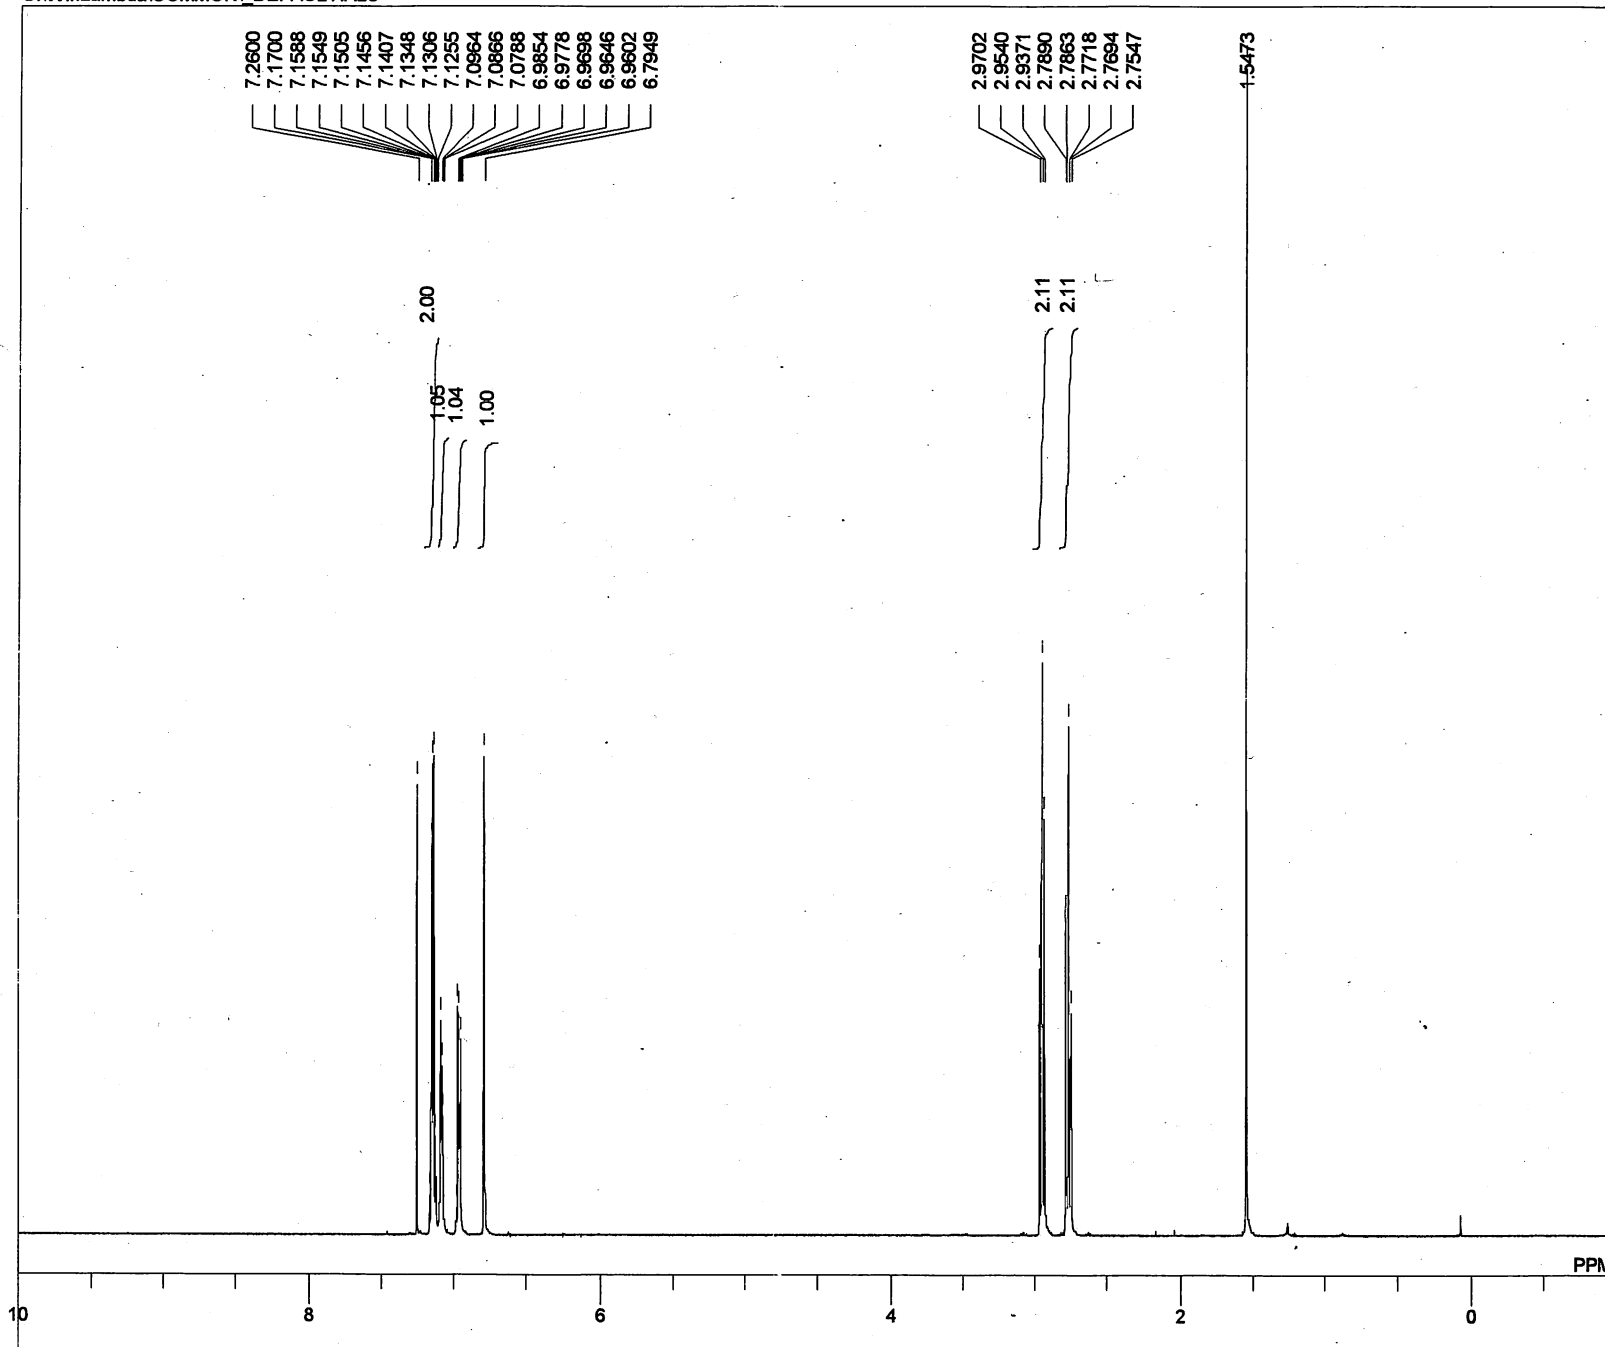

MENUF 1H  
OBNUC 1H  
OFR 499.10 MHz  
OBSET 0.00 KHz  
OBFIN 128885.00 Hz  
PW1 5.50 usec  
DEADT 72.30 usec  
PREDL 0.01000 msec  
IWT 1000.0000 msec  
POINT 65536  
SPO 65536  
TIMES 16  
DUMMY 0  
FREQU 8000.00 Hz  
FLT 4000 Hz  
DELAY 50.00 usec  
ACQTM 8.1920 sec  
PD 1.0000 sec  
ADBIT 16  
RGAIN 25  
BF 0.12 Hz  
T1 0.00  
T2 0.00  
T3 90.00  
T4 100.00  
EXMOD non  
EXPCM single pulse nondecoupling & nonpresaturation  
IRNUC 1H  
IFR 499.10 MHz  
IRSET 0.00 KHz  
IRFIN 128250.00 Hz  
IRRPW 50 usec  
IRATN 511  
DFILE \_DEFAULT.ALS  
SF th5at  
LKSET 0.00 KHz  
LKFIN 26934.0 Hz  
LKLEV 200  
LGAIN 19  
LKPHS 353  
LKSIG 598  
CSPED 12 Hz  
FILDC  
FILDF  
SLVNT CDCL3  
DATIM Fri Oct 24 19:31:51 2008

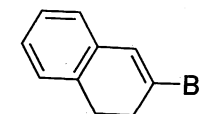

entry 13 of Table 2

ima07041ptlc

C:\WinLambda\COMMON\DEFAULT.ALS

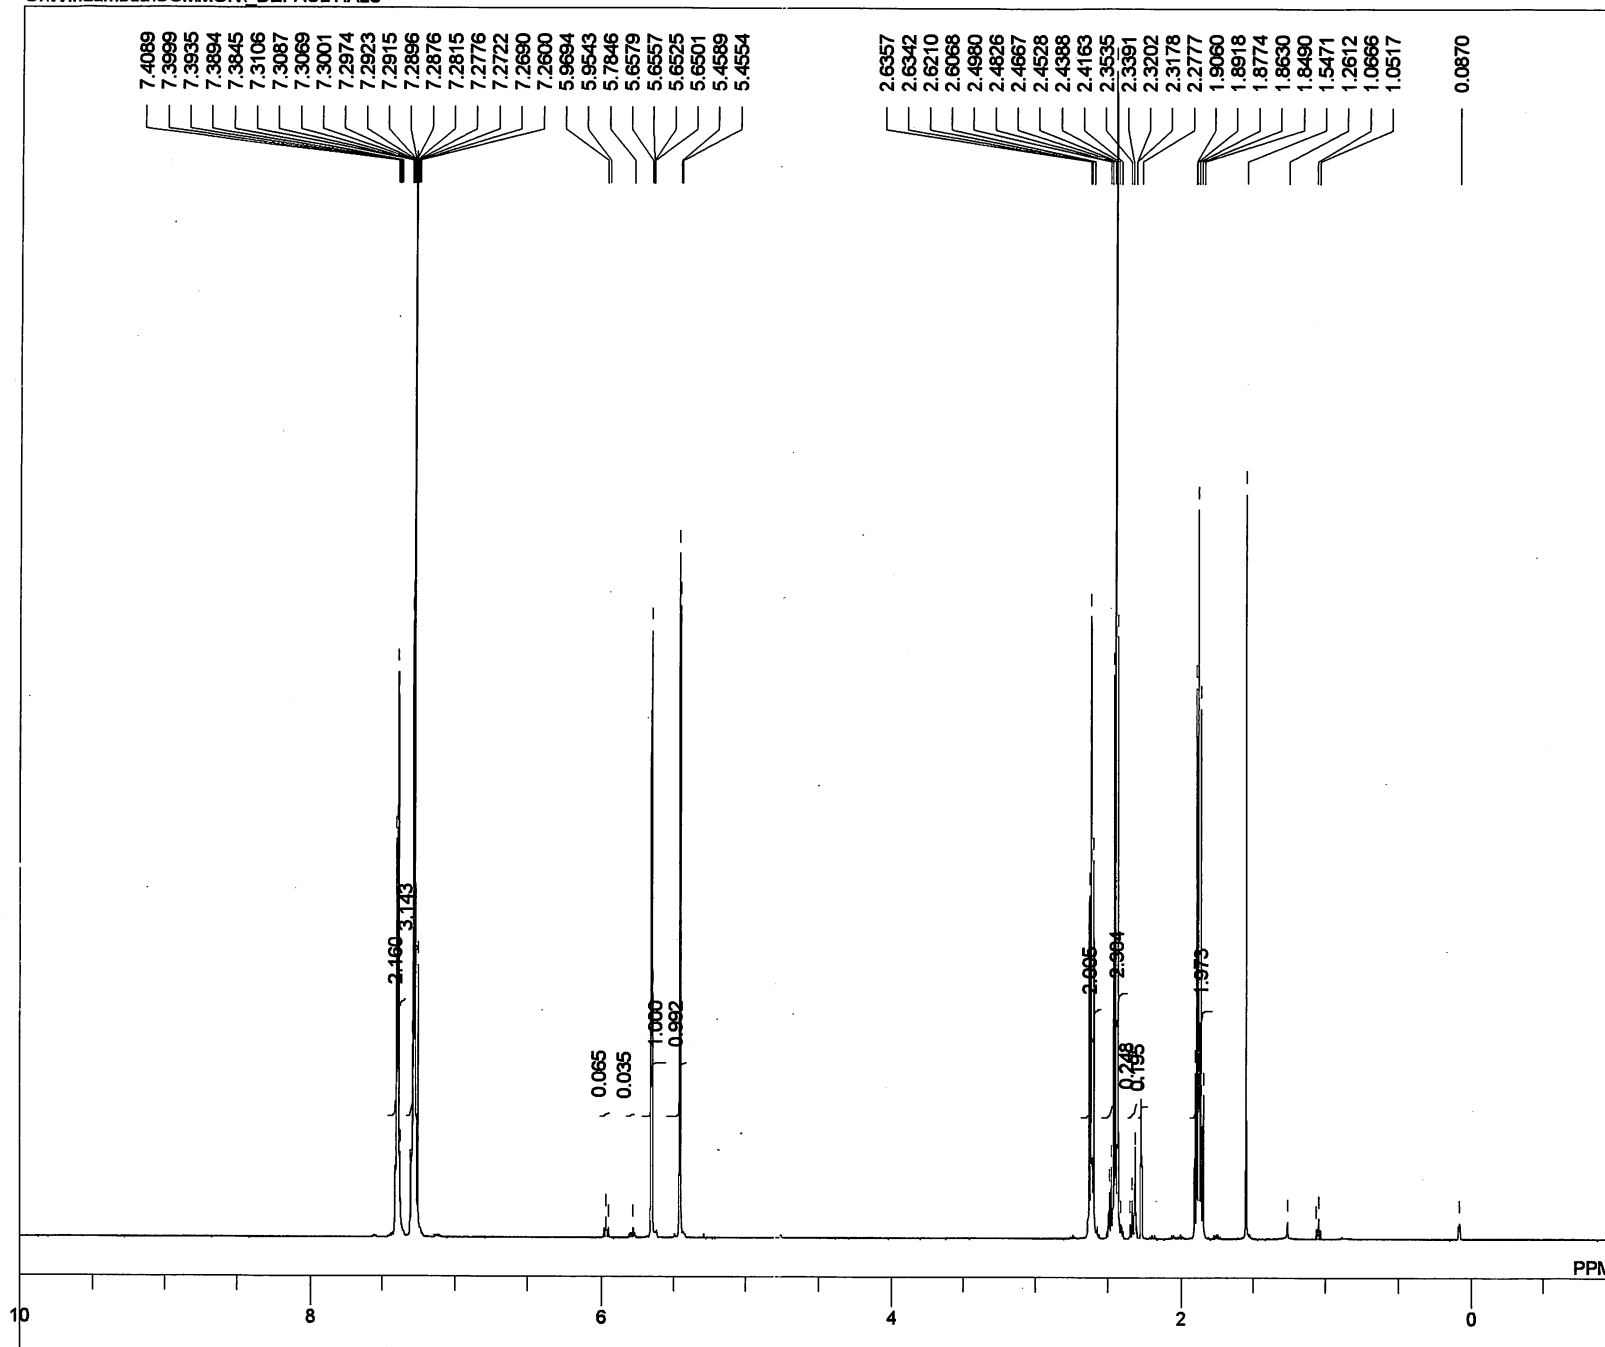

|       |                                               |
|-------|-----------------------------------------------|
| MENUF | 1H                                            |
| OBNUC | 1H                                            |
| OFR   | 499.10 MHz                                    |
| OBSET | 0.00-KHz                                      |
| OBFIN | 128885.00 Hz                                  |
| PW1   | 5.50 usec                                     |
| DEADT | 72.30 usec                                    |
| PREDL | 0.01000 msec                                  |
| IWT   | 1000.0000 msec                                |
| POINT | 65536                                         |
| SPO   | 65536                                         |
| TIMES | 8                                             |
| DUMMY | 0                                             |
| FREQU | 8000.00 Hz                                    |
| FLT   | 4000 Hz                                       |
| DELAY | 50.00 usec                                    |
| ACQTM | 8.1920 sec                                    |
| PD    | 1.0000 sec                                    |
| ADBIT | 16                                            |
| RGAIN | 22                                            |
| BF    | 0.12 Hz                                       |
| T1    | 0.00                                          |
| T2    | 0.00                                          |
| T3    | 90.00                                         |
| T4    | 100.00                                        |
| EXMOD | non                                           |
| EXPCM | single pulse nondecoupling & nonpresaturation |
| IRNUC | 1H                                            |
| IFR   | 499.10 MHz                                    |
| IRSET | 0.00 KHz                                      |
| IRFIN | 128250.00 Hz                                  |
| IRRPW | 50 usec                                       |
| IRATN | 511                                           |
| DFILE | _DEFAULT.ALS                                  |
| SF    | th5at                                         |
| LKSET | 0.00 KHz                                      |
| LKFIN | 26934.0 Hz                                    |
| LKLEV | 200                                           |
| LGAIN | 19                                            |
| LKPHS | 353                                           |
| LKSIG | 605                                           |
| CSPED | 13 Hz                                         |
| FILDC |                                               |
| FILDF |                                               |
| SLVNT | CDCL3                                         |
| DATIM | Fri Oct 17 22:02:45 2008                      |

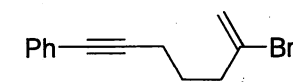

entry 14 of Table 2

C:\WinLambda\COMMON\DEFAULT.ALS

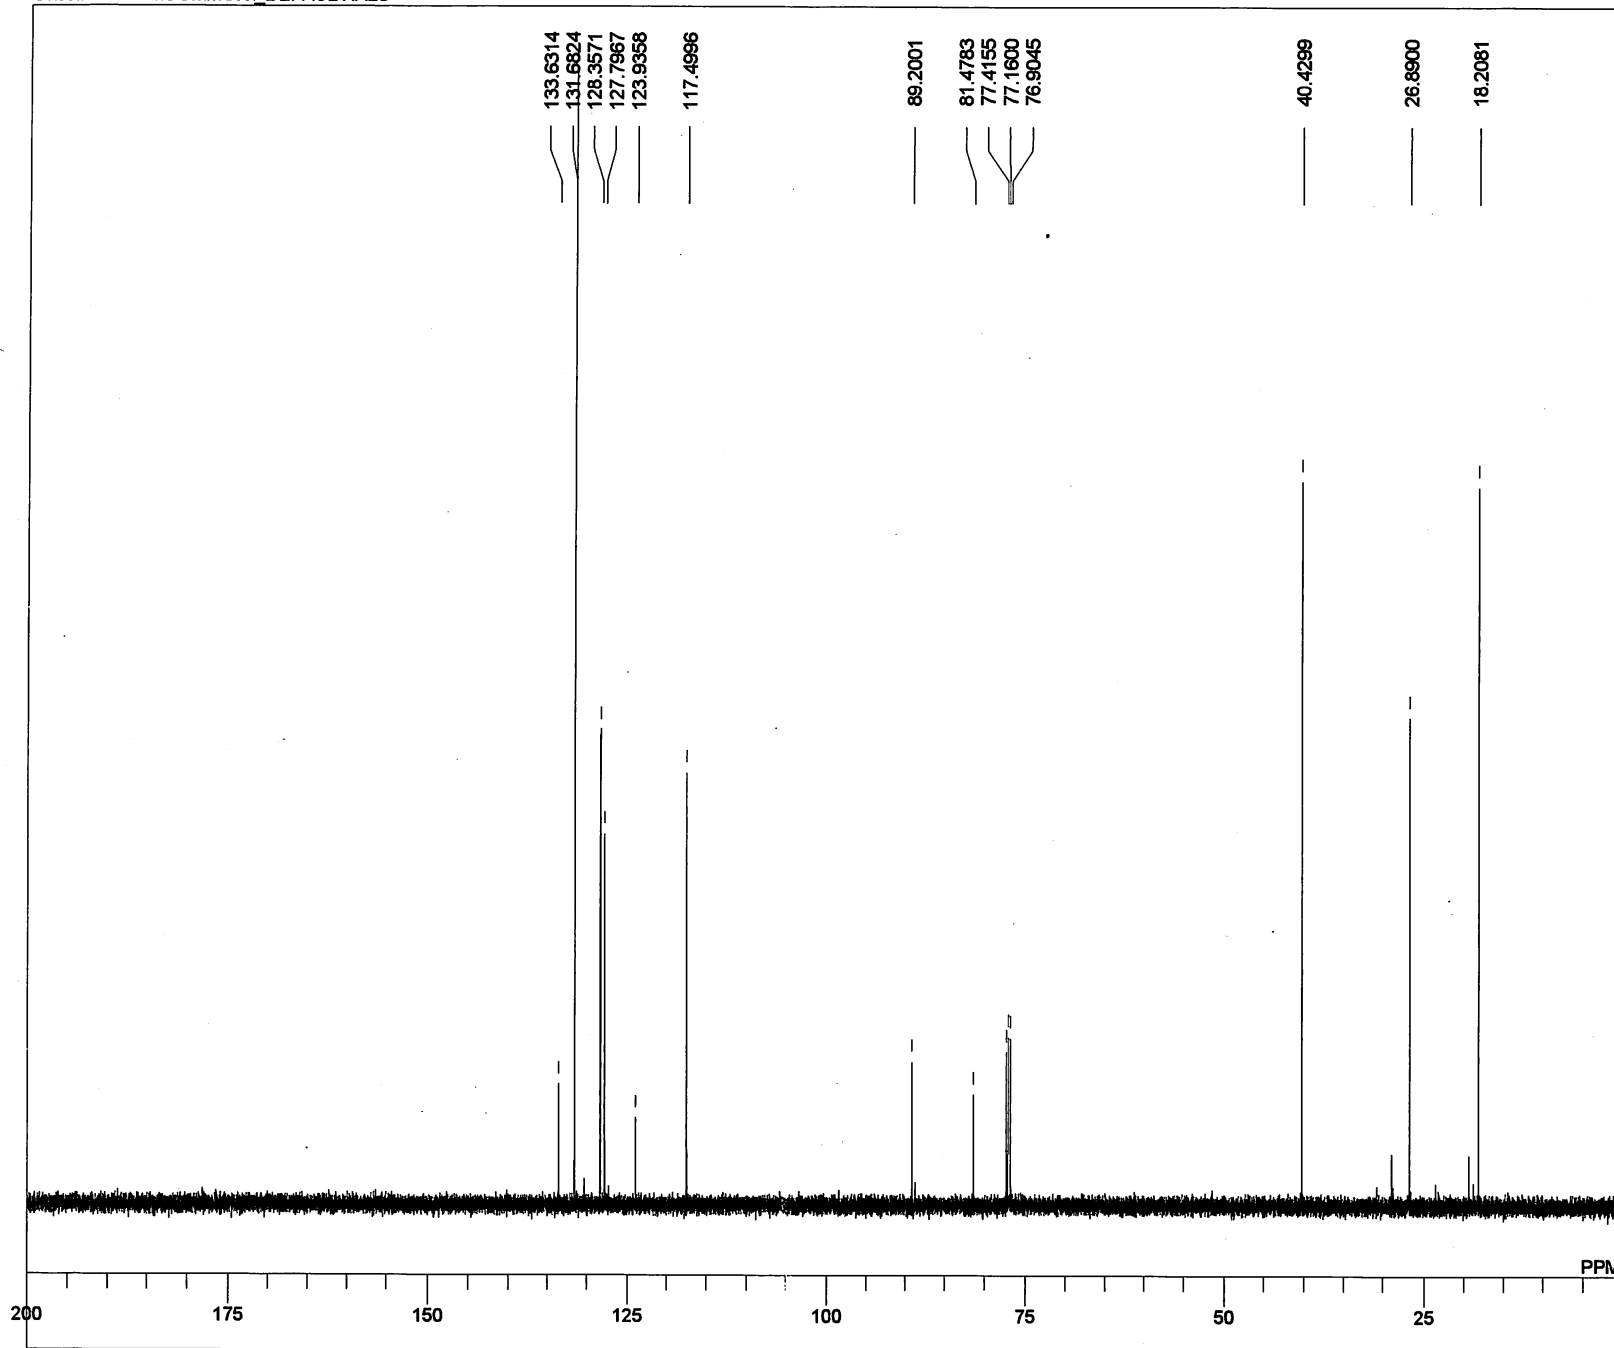

MENUF 13C  
 OBNUC 13C  
 OFR 125.40 MHz  
 OBSET 0.00 KHz  
 OBFIN 143041.00 Hz  
 PW1 6.25 usec  
 DEADT 10.00 usec  
 PREDL 0.01000 msec  
 IWT 1000.0000 msec  
 POINT 65536  
 SPO 65536  
 TIMES 144  
 DUMMY 2  
 FREQU 33898.30 Hz  
 FLT 16950 Hz  
 DELAY 11.80 usec  
 ACQTM 1.9333 sec  
 PD 1.0670 sec  
 ADBIT 16  
 RGAIN 30  
 BF 0.12 Hz  
 T1 0.00  
 T2 0.00  
 T3 90.00  
 T4 100.00  
 EXMOD bcm  
 EXPCM single pulse with bilevel decoupling  
 IRNUC 1H  
 IFR 499.10 MHz  
 IRSET 0.00 KHz  
 IRFIN 128250.00 Hz  
 IRRPW 50 usec  
 IRATN 511  
 DFILE \_DEFAULT.ALS  
 SF th5at  
 LKSET 0.00 KHz  
 LKFIN 26934.0 Hz  
 LKLEV 200  
 LGAIN 20  
 LKPHS 353  
 LKSIG 743  
 CSPED 12 Hz  
 FILDC  
 FILDF  
 SLVNT CDCL3  
 DATIM Fri Oct 17 22:17:49 2008

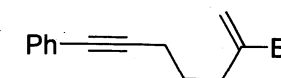

entry 14 of Table 2



C:\Personal\imazaki\ima07056.als

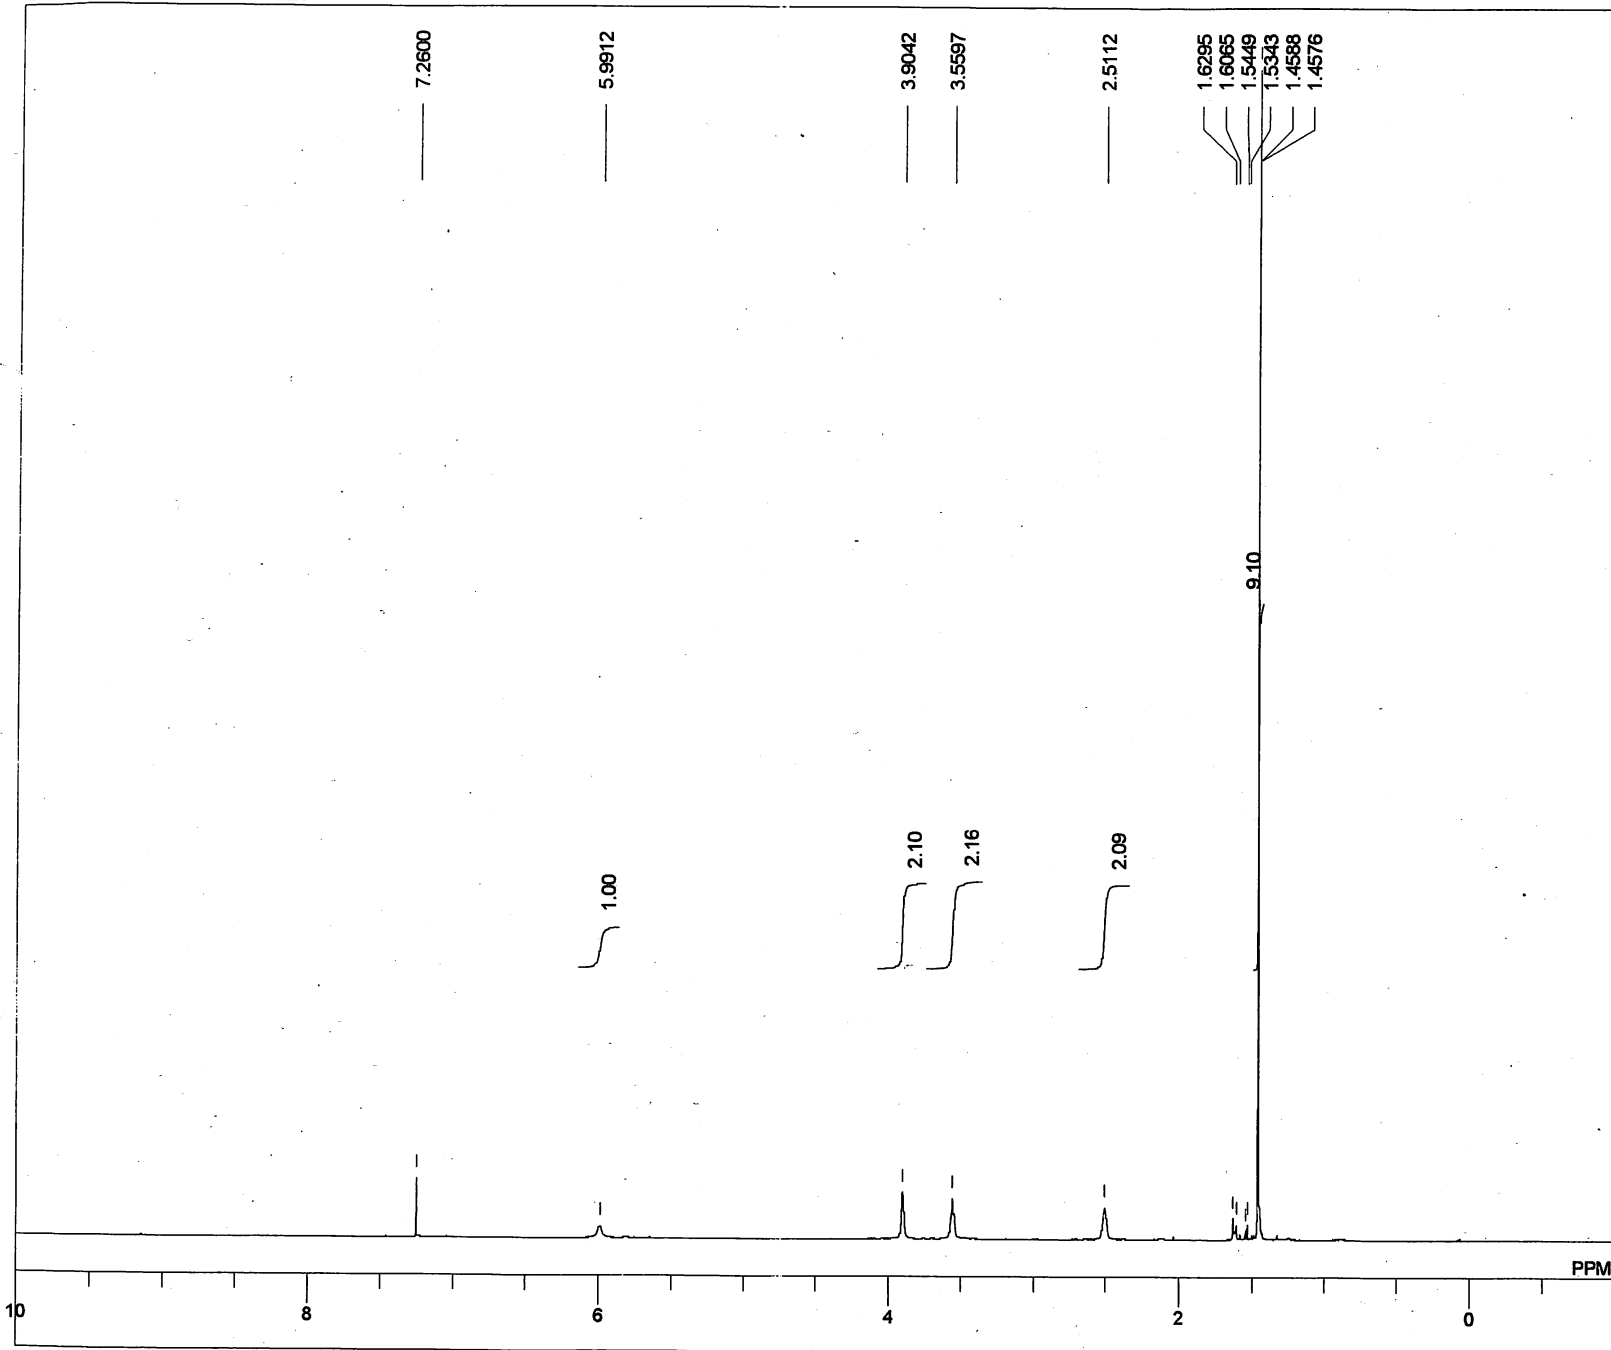

|       |                                               |
|-------|-----------------------------------------------|
| MENUF | 1H                                            |
| OBNUC | 1H                                            |
| OFR   | 499.10 MHz                                    |
| OBSET | 0.00 KHz                                      |
| OBFIN | 128885.00 Hz                                  |
| PW1   | 5.50 usec                                     |
| DEADT | 72.30 usec                                    |
| PREDL | 0.01000 msec                                  |
| IWV   | 1000.0000 msec                                |
| POINT | 65536                                         |
| SPO   | 65536                                         |
| TIMES | 8                                             |
| DUMMY | 0                                             |
| FREQU | 8000.00 Hz                                    |
| FLT   | 4000 Hz                                       |
| DELAY | 50.00 usec                                    |
| ACQTM | 8.1920 sec                                    |
| PD    | 1.0000 sec                                    |
| ADBIT | 16                                            |
| RGAIN | 21                                            |
| BF    | 0.12 Hz                                       |
| T1    | 0.00                                          |
| T2    | 0.00                                          |
| T3    | 90.00                                         |
| T4    | 100.00                                        |
| EXMOD | non                                           |
| EXPCM | single pulse nondecoupling & nonpresaturation |
| IRNUC | 1H                                            |
| IFR   | 499.10 MHz                                    |
| IRSET | 0.00 KHz                                      |
| IRFIN | 128250.00 Hz                                  |
| IRRPW | 50 usec                                       |
| IRATN | 511                                           |
| DFILE | ima07056.als                                  |
| SF    | th5at                                         |
| LKSET | 0.00 KHz                                      |
| LKFIN | 26934.0 Hz                                    |
| LKLEV | 200                                           |
| LGAIN | 19                                            |
| LKPHS | 353                                           |
| LKSIG | 634                                           |
| CSPED | 14 Hz                                         |
| FILDC |                                               |
| FILDF |                                               |
| SLVNT | CDCL3                                         |
| DATIM | Fri Nov 07 21:47:19 2008                      |

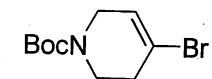

entry 15 of Table 2

C:\Personal\imazakilima07056\_13C\_21bcm\_E1\_FT.als

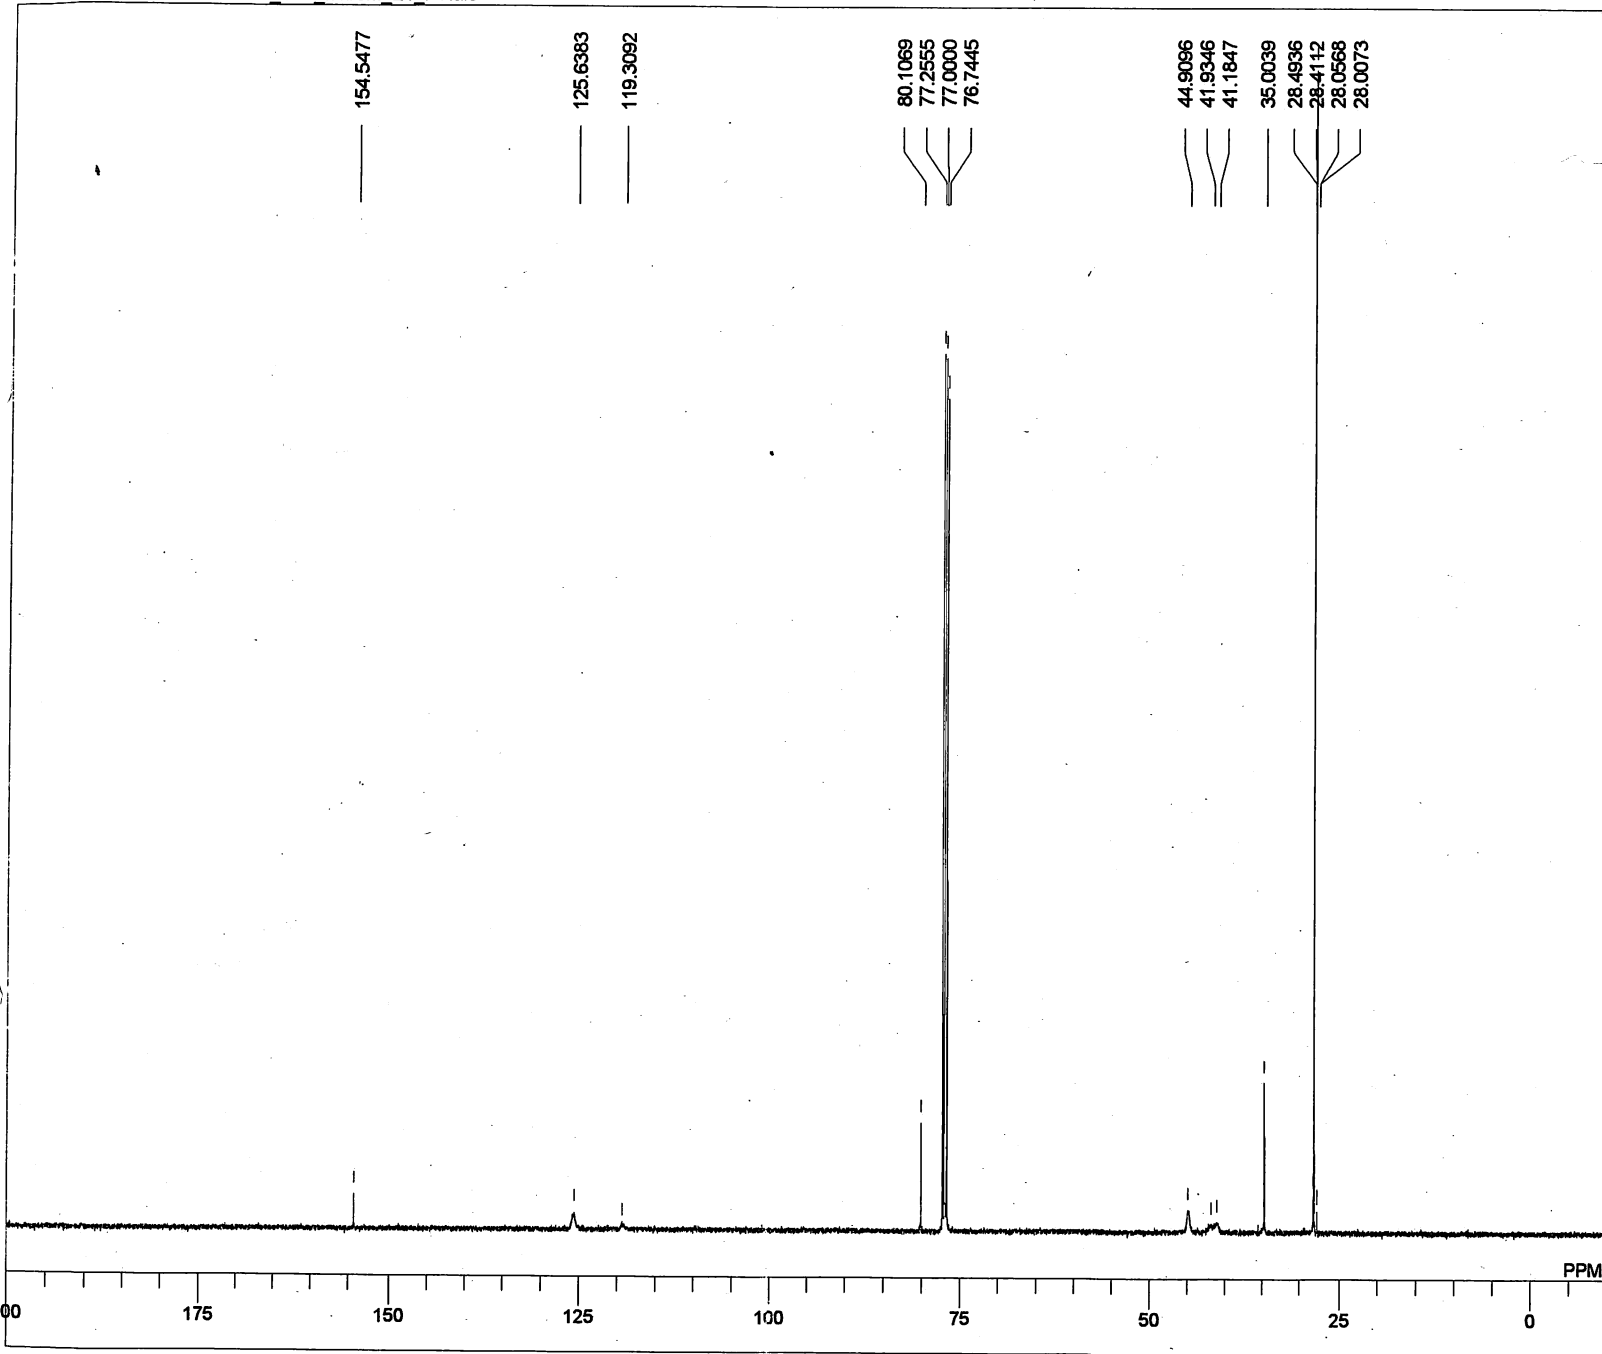

|       |                                      |
|-------|--------------------------------------|
| MENUF | bcm                                  |
| OBNUC | 13C                                  |
| OFR   | 125.40 MHz                           |
| OBSET | 0.00 KHz                             |
| OBFIN | 143041.00 Hz                         |
| PW1   | 5.50 usec                            |
| DEADT | 10.00 usec                           |
| PREDL | 10.00000 msec                        |
| IWT   | 10.0000 msec                         |
| POINT | 32768                                |
| SPO   | 32768                                |
| TIMES | 5120                                 |
| DUMMY | 1                                    |
| FREQU | 33898.30 Hz                          |
| FLT   | 16950 Hz                             |
| DELAY | 11.80 usec                           |
| ACQTM | 0.9667 sec                           |
| PD    | 2.0333 sec                           |
| ADBIT | 16                                   |
| RGAIN | 30                                   |
| BF    | 1.20 Hz                              |
| T1    | 0.00                                 |
| T2    | 0.00                                 |
| T3    | 90.00                                |
| T4    | 100.00                               |
| EXMOD | bcm                                  |
| EXPCM | single pulse with bilevel decoupling |
| IRNUC | 1H                                   |
| IFR   | 499.10 MHz                           |
| IRSET | 0.00 KHz                             |
| IRFIN | 128250.00 Hz                         |
| IRRPW | 65 usec                              |
| IRATN | 511                                  |
| DFILE | ima07056_13C_21bcm_E1_FT.als         |
| SF    | th5at                                |
| LKSET | 0.00 KHz                             |
| LKFIN | 26934.0 Hz                           |
| LKLEV | 200                                  |
| LGAIN | 19                                   |
| LKPHS | 353                                  |
| LKSIG | 556                                  |
| CSPED | 13 Hz                                |
| FILDG |                                      |
| FILDF |                                      |
| SLVNT | CDCL3                                |
| DATIM | Wed Nov 12 05:25:33 2008             |

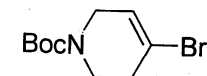

entry 15 of Table 2

ima07055

C:\WinLambda\COMMON\_DEFAULT.ALS

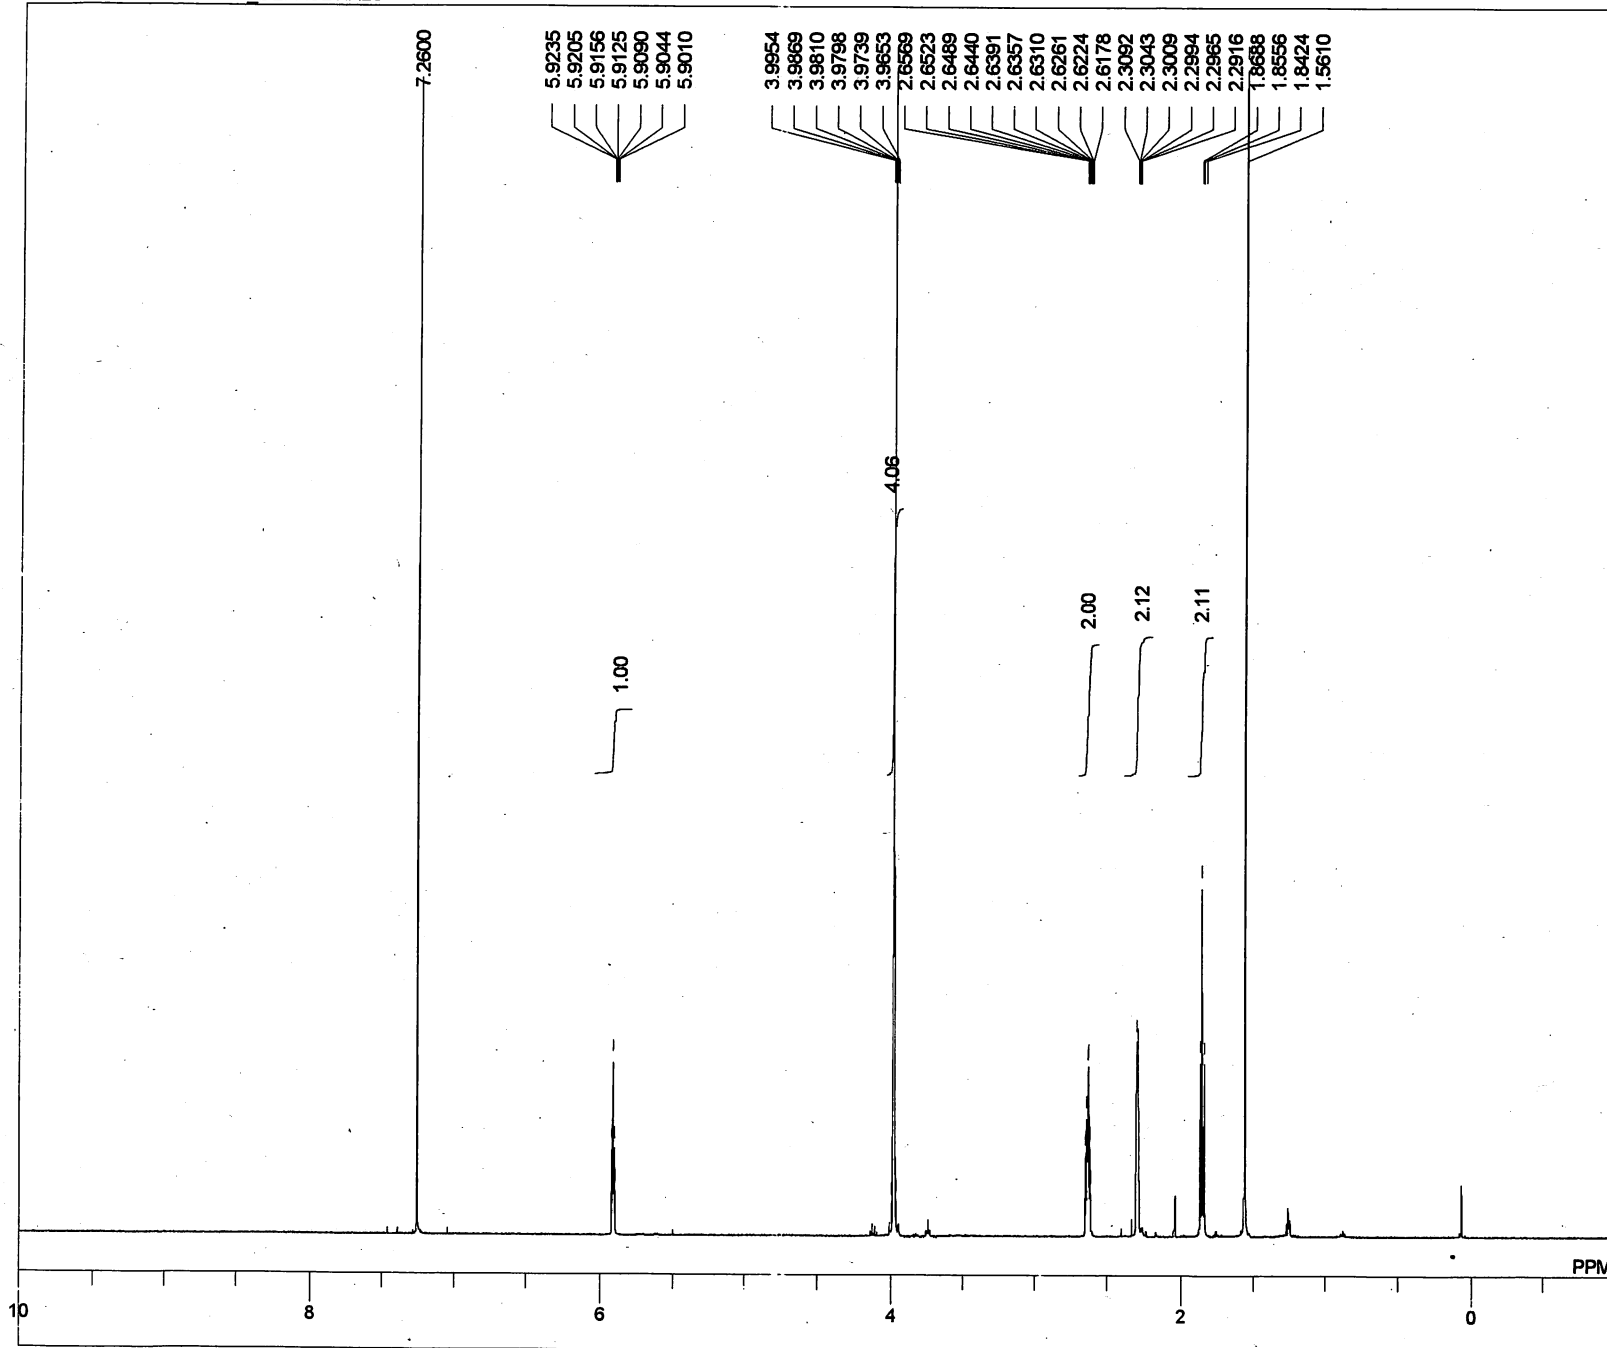

|       |                                            |
|-------|--------------------------------------------|
| MENUF | 1H                                         |
| OBNUC | 1H                                         |
| OFR   | 499.10 MHz                                 |
| OBSET | 0.00 KHz                                   |
| OBFIN | 128885.00 Hz                               |
| PW1   | 5.50 usec                                  |
| DEADT | 72.30 usec                                 |
| PREDL | 0.01000 msec                               |
| IWT   | 1000.0000 msec                             |
| POINT | 65536                                      |
| SPO   | 65536                                      |
| TIMES | 16                                         |
| DUMMY | 0                                          |
| FREQU | 8000.00 Hz                                 |
| FLT   | 4000 Hz                                    |
| DELAY | 50.00 usec                                 |
| ACQTM | 8.1920 sec                                 |
| PD    | 1.0000 sec                                 |
| ADBIT | 16                                         |
| RGAIN | 26                                         |
| BF    | 0.12 Hz                                    |
| T1    | 0.00                                       |
| T2    | 0.00                                       |
| T3    | 90.00                                      |
| T4    | 100.00                                     |
| EXMOD | non                                        |
| EXPCM | single pulse nondecoupling & nonpresaturat |
| IRNUC | 1H                                         |
| IFR   | 499.10 MHz                                 |
| IRSET | 0.00 KHz                                   |
| IRFIN | 128250.00 Hz                               |
| IRRPW | 50 usec                                    |
| IRATN | 511                                        |
| DFILE | _DEFAULT.ALS                               |
| SF    | th5at                                      |
| LKSET | 0.00 KHz                                   |
| LKFIN | 26934.0 Hz                                 |
| LKLEV | 200                                        |
| LGAIN | 19                                         |
| LKPHS | 353                                        |
| LKSIG | 641                                        |
| CSPED | 14 Hz                                      |
| FILDQ |                                            |
| FILDF |                                            |
| SLVNT | CDCL3                                      |
| DATIM | Fri Nov 07 16:18:59 2008                   |

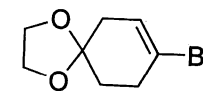

entry 16 of Table 2

C:\WinLambda\COMMON\DEFAULT.ALS

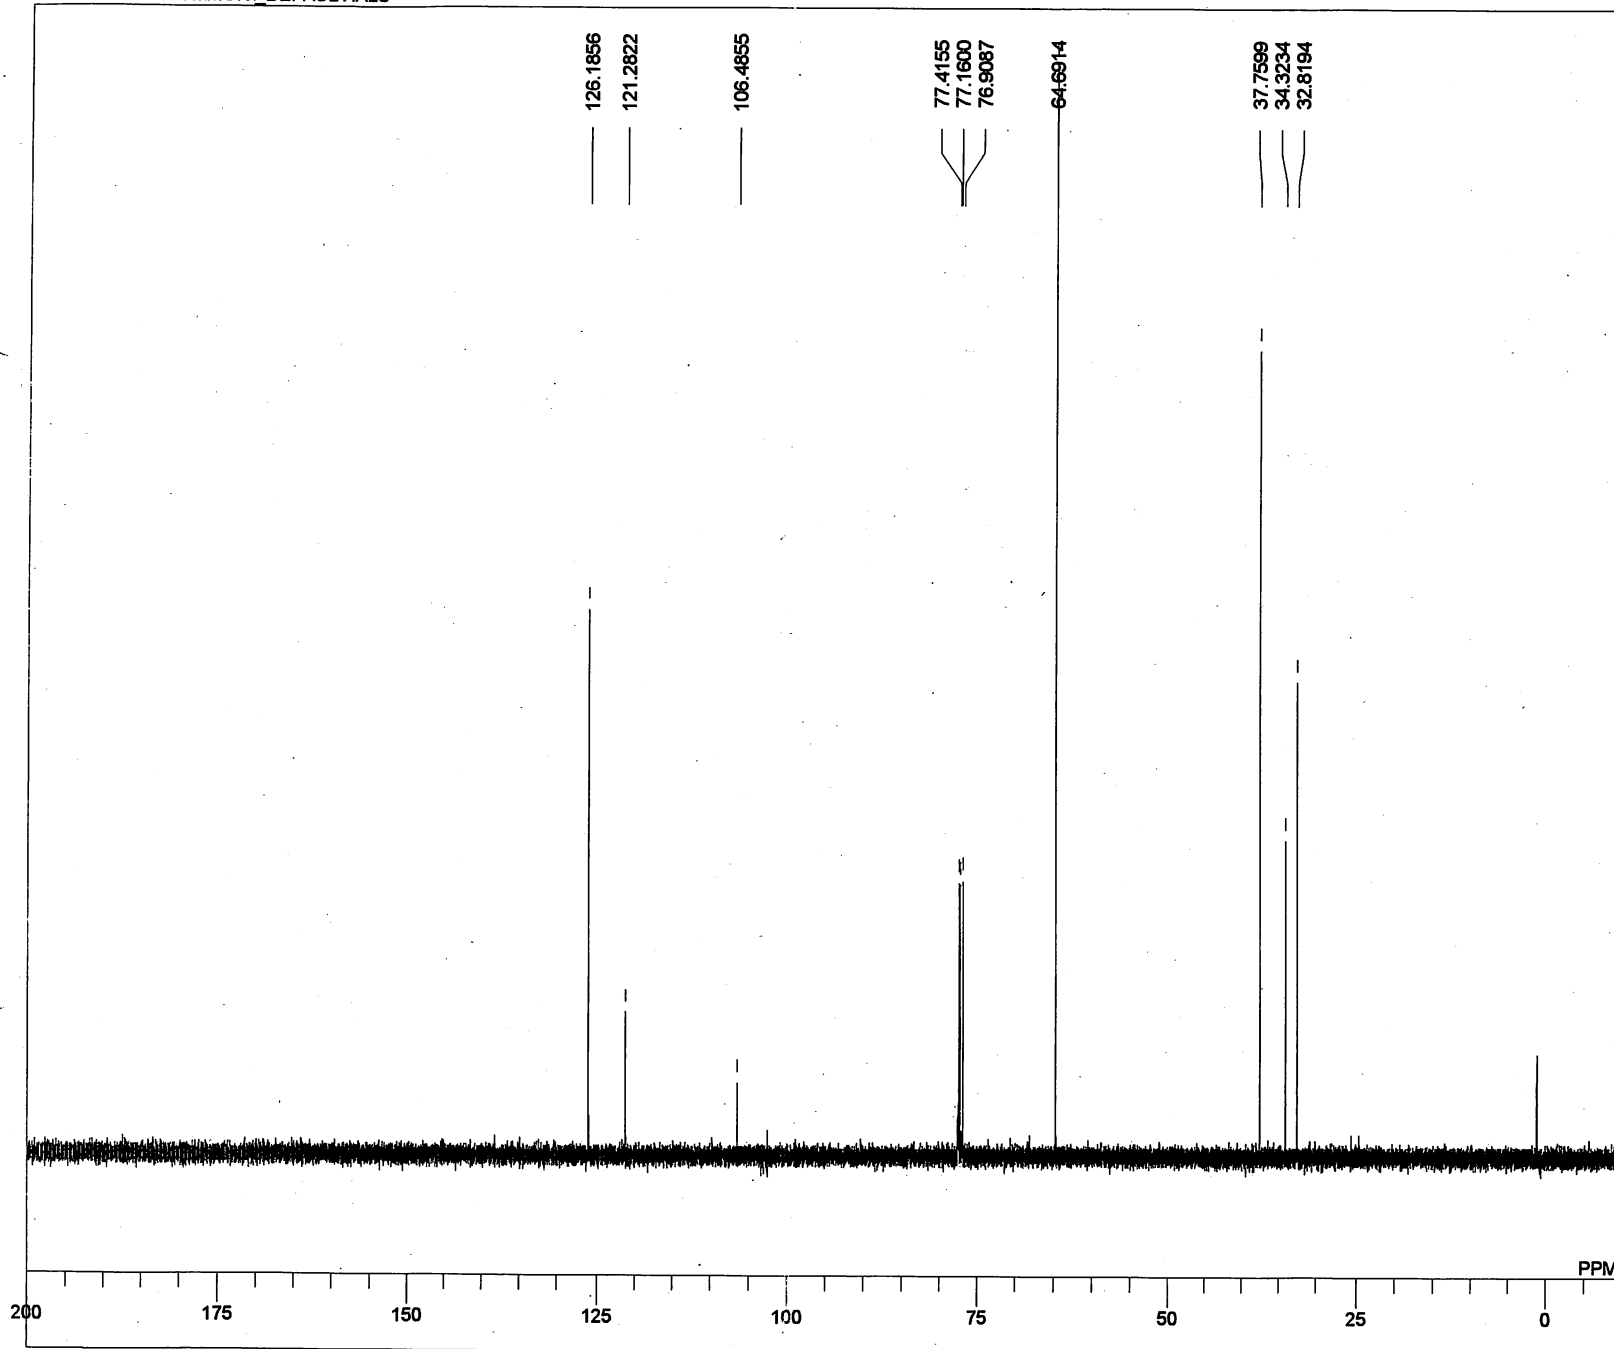

MENUF 13C  
 OBNUC 13C  
 OFR 125.40 MHz  
 OBSET 0.00 KHz  
 OBFIN 143041.00 Hz  
 PW1 6.25 usec  
 DEADT 10.00 usec  
 PREDL 0.01000 msec  
 IWT 1000.0000 msec  
 POINT 65536  
 SPO 65536  
 TIMES 256  
 DUMMY 2  
 FREQU 33898.30 Hz  
 FLT 16950 Hz  
 DELAY 11.80 usec  
 ACQTM 1.9333 sec  
 PD 1.0670 sec  
 ADBIT 16  
 RGAIN 30  
 BF 0.12 Hz  
 T1 0.00  
 T2 0.00  
 T3 90.00  
 T4 100.00  
 EXMOD bcm  
 EXPCM single pulse with bilevel decoupling  
 IRNUC 1H  
 IFR 499.10 MHz  
 IRSET 0.00 KHz  
 IRFIN 128250.00 Hz  
 IRRPW 50 usec  
 IRATN 511  
 DFILE \_DEFAULT.ALS  
 SF th5at  
 LKSET 0.00 KHz  
 LKFIN 26934.0 Hz  
 LKLEV 200  
 LGAIN 19  
 LKPHS 353  
 LKSIG 612  
 CSPED 12 Hz  
 FILDC  
 FILDF  
 SLVNT CDCL3  
 DATIM Fri Nov 07 18:29:40 2008

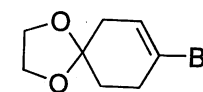

entry 16 of Table 2

ima07085

C:\Personal\imazaki\ima07085-1.als

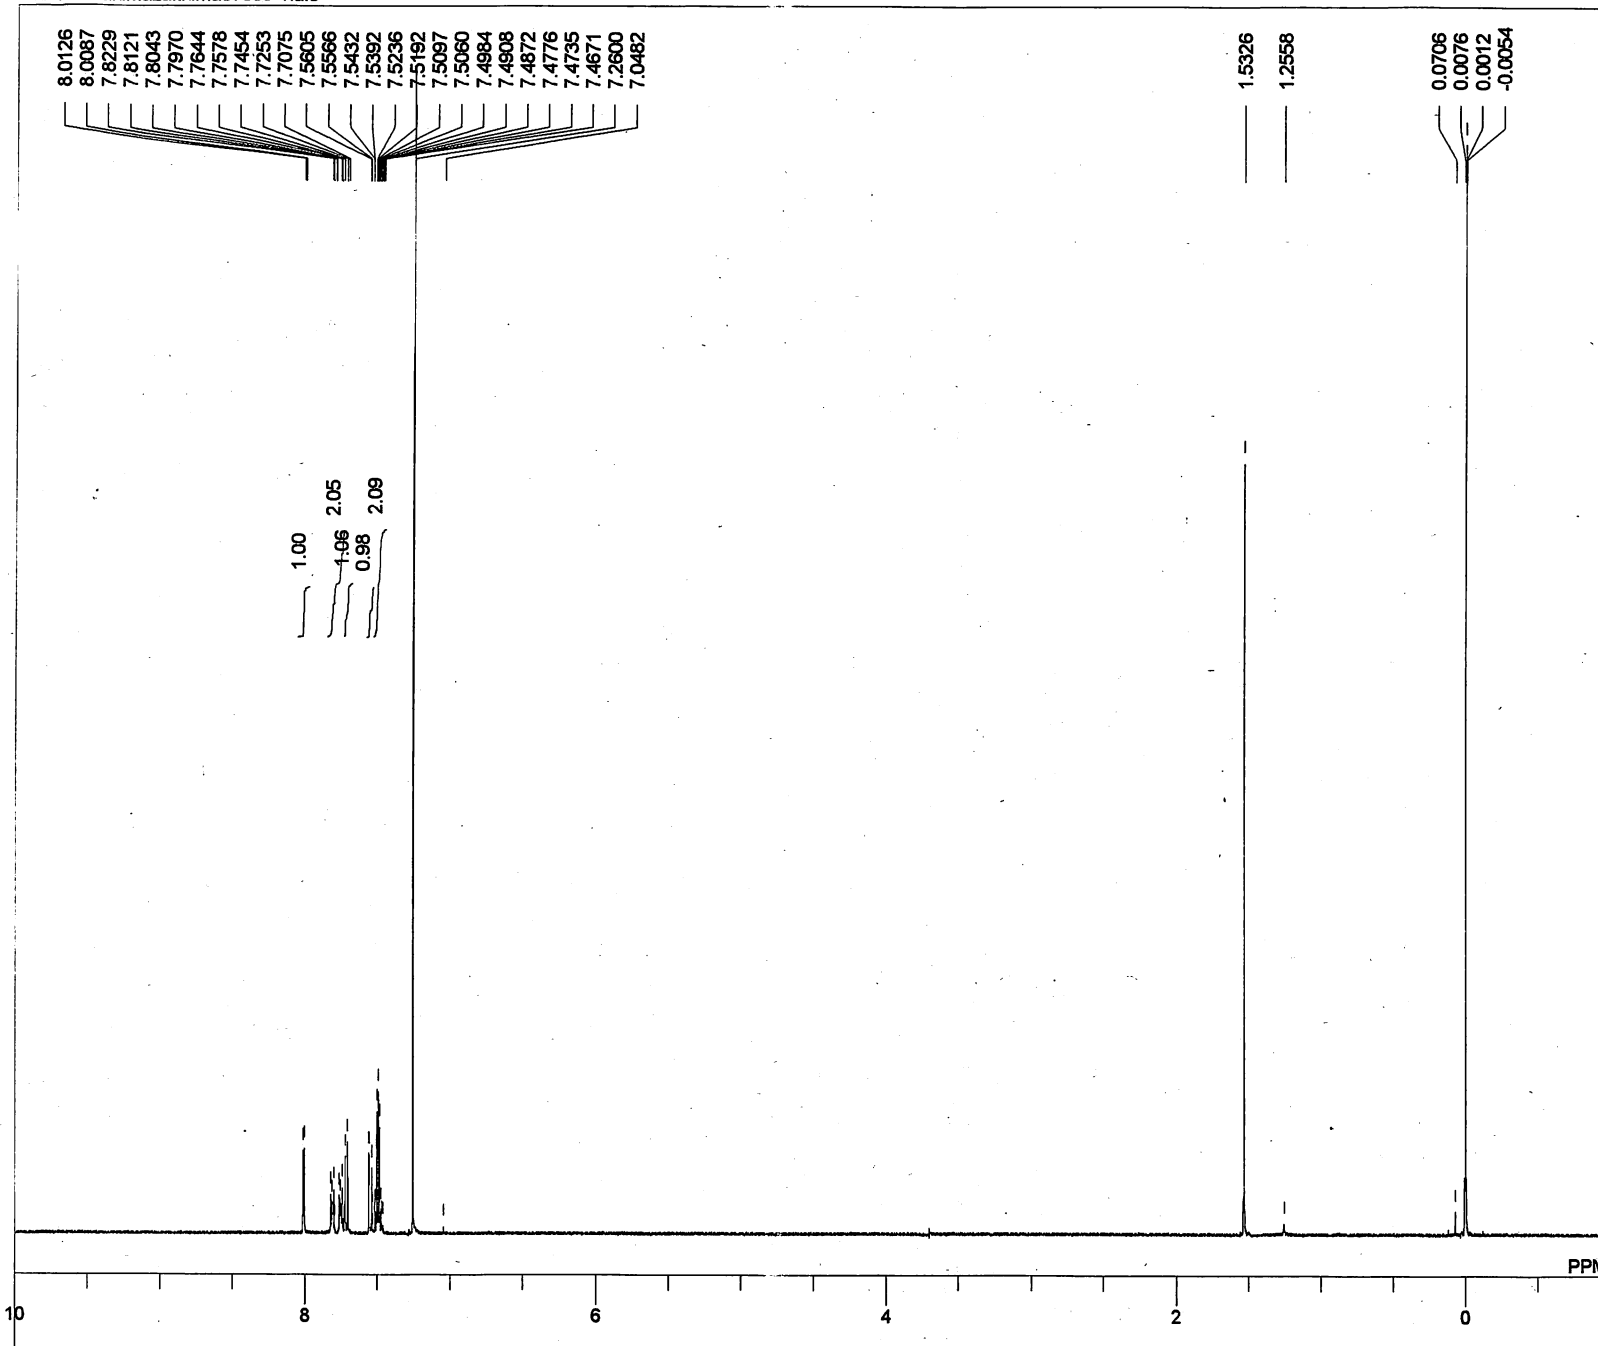

|       |                                               |
|-------|-----------------------------------------------|
| MENUF | 1H                                            |
| OBNUC | 1H                                            |
| OFR   | 499.10 MHz                                    |
| OBSET | 0.00 KHz                                      |
| OBFIN | 128885.00 Hz                                  |
| PW1   | 5.50 usec                                     |
| DEADT | 72.30 usec                                    |
| PREDL | 0.01000 msec                                  |
| IWT   | 1000.0000 msec                                |
| POINT | 65536                                         |
| SPO   | 65536                                         |
| TIMES | 8                                             |
| DUMMY | 0                                             |
| FREQU | 8000.00 Hz                                    |
| FLT   | 4000 Hz                                       |
| DELAY | 50.00 usec                                    |
| ACQTM | 8.1920 sec                                    |
| PD    | 1.0000 sec                                    |
| ADBIT | 16                                            |
| RGAIN | 30                                            |
| BF    | 0.12 Hz                                       |
| T1    | 0.00                                          |
| T2    | 0.00                                          |
| T3    | 90.00                                         |
| T4    | 100.00                                        |
| EXMOD | non                                           |
| EXPCM | single pulse nondecoupling & nonpresaturation |
| IRNUC | 1H                                            |
| IFR   | 499.10 MHz                                    |
| IRSET | 0.00 KHz                                      |
| IRFIN | 128250.00 Hz                                  |
| IRRPW | 50 usec                                       |
| IRATN | 511                                           |
| DFILE | ima07085-1.als                                |
| SF    | th5at                                         |
| LKSET | 0.00 KHz                                      |
| LKFIN | 26934.0 Hz                                    |
| LKLEV | 200                                           |
| LGAIN | 19                                            |
| LKPHS | 353                                           |
| LKSIG | 598                                           |
| CSPED | 14 Hz                                         |
| FILDC |                                               |
| FILDF |                                               |
| SLVNT | CDCL3                                         |
| DATIM | Sat Dec 20 15:47:55 2008                      |

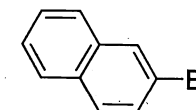

4

ima07095PTLC

C:\Personal\imazaki\ima07095PTLC.als

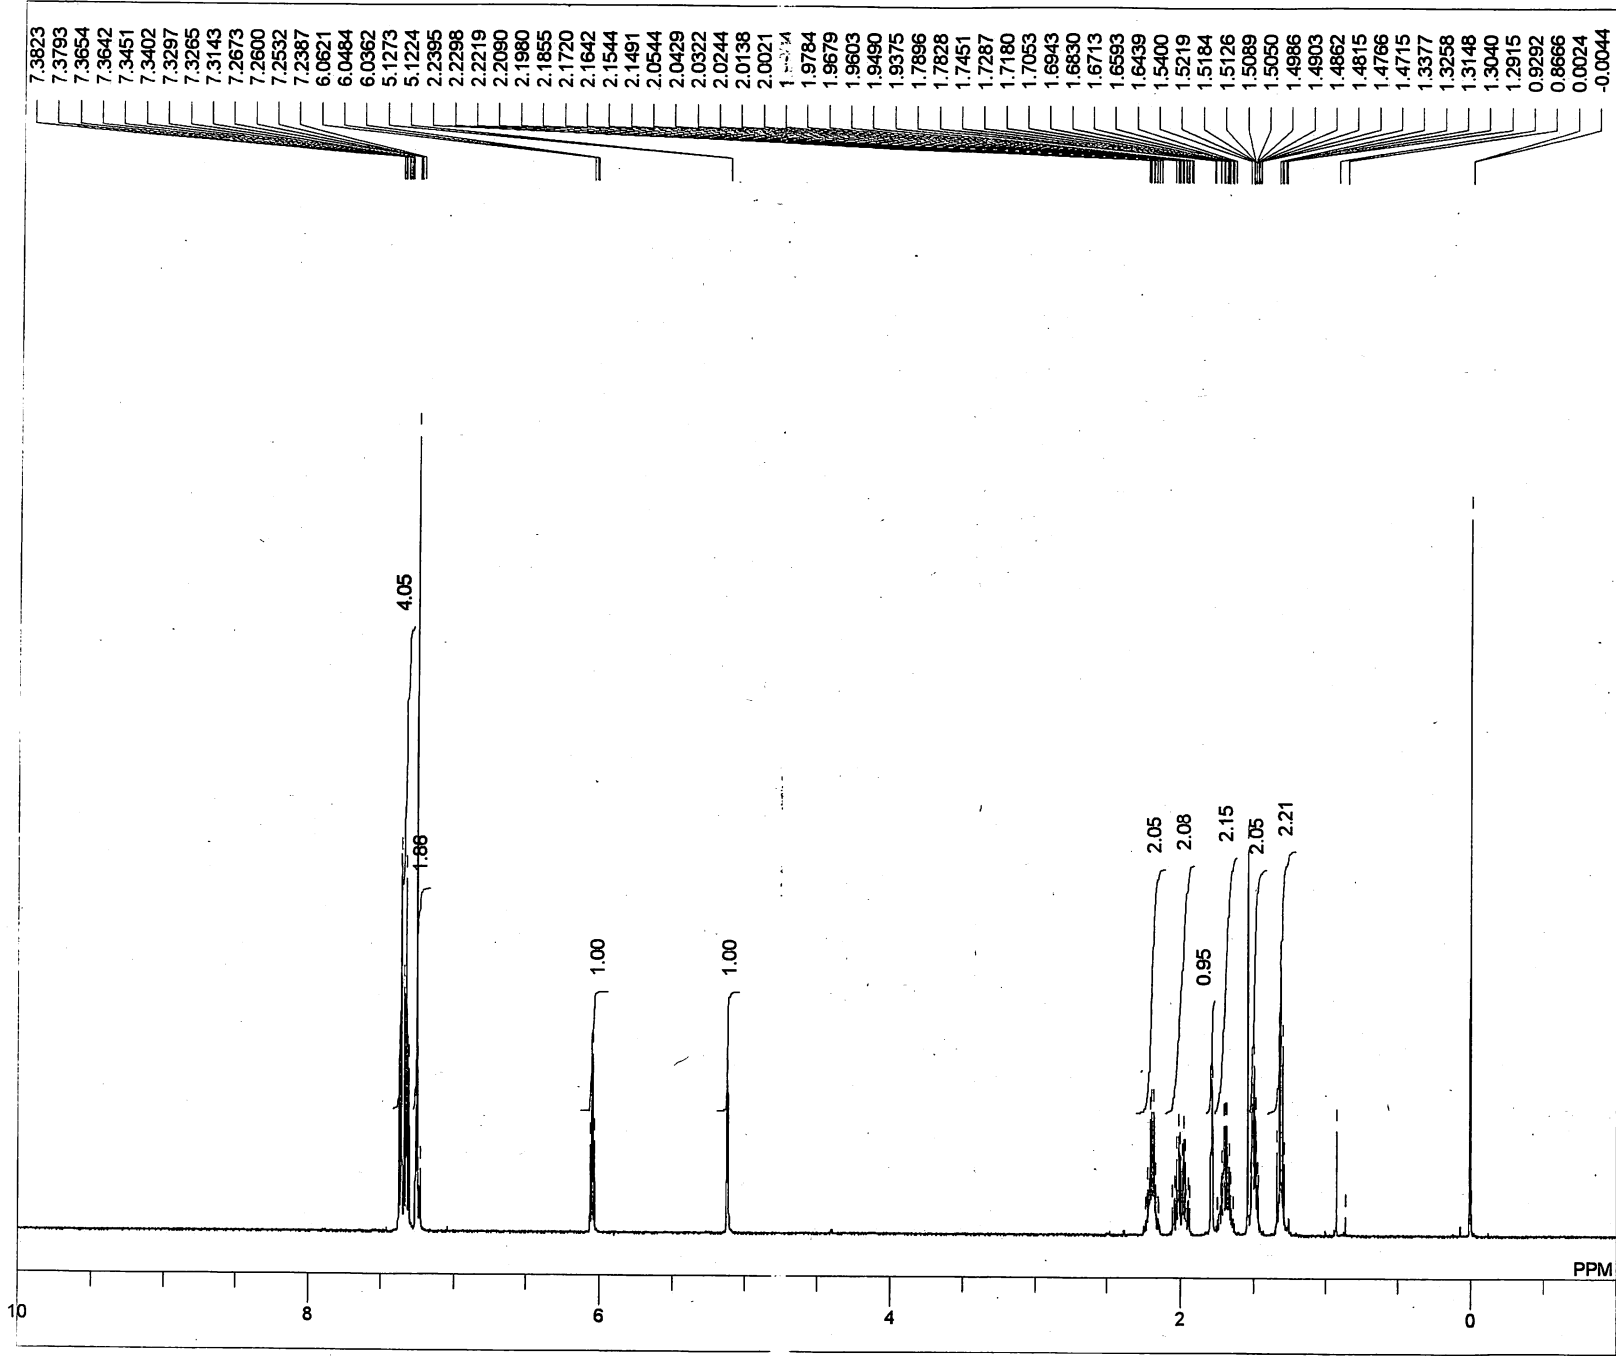

MENUF 1H  
 OBNUC 1H  
 OFR 499.10 MHz  
 OBSET 0.00 KHz  
 OBFIN 128885.00 Hz  
 PW1 5.50 usec  
 DEADT 72.30 usec  
 PREDL 0.01000 msec  
 IWV 1000.0000 msec  
 POINT 65536  
 SPO 65536  
 TIMES 8  
 DUMMY 0  
 FREQU 8000.00 Hz  
 FLT 4000 Hz  
 DELAY 50.00 usec  
 ACQTM 8.1920 sec  
 PD 1.0000 sec  
 ADBIT 16  
 RGAIN 25  
 BF 0.12 Hz  
 T1 0.00  
 T2 0.00  
 T3 90.00  
 T4 100.00  
 EXMOD non  
 EXPCM single pulse nondecoupling & nonpresaturation  
 IRNUC 1H  
 IFR 499.10 MHz  
 IRSET 0.00 KHz  
 IRFIN 128250.00 Hz  
 IRRPW 50 usec  
 IRATN 511  
 DFILE ima07095PTLC.als  
 SF th5at  
 LKSET 0.00 KHz  
 LKFIN 26934.0 Hz  
 LKLEV 200  
 LGAIN 20  
 LKPHS 353  
 LKSIG 684  
 CSPED 12 Hz  
 FILDC  
 FILDf  
 SLVNT CDCL3  
 DATIM Wed Dec 24 22:10:28 2008

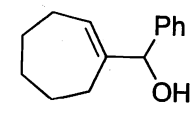

3

ima07095PTLC\_13C

C:\Personal\imazaki\ima07095PTLC\_13C.als

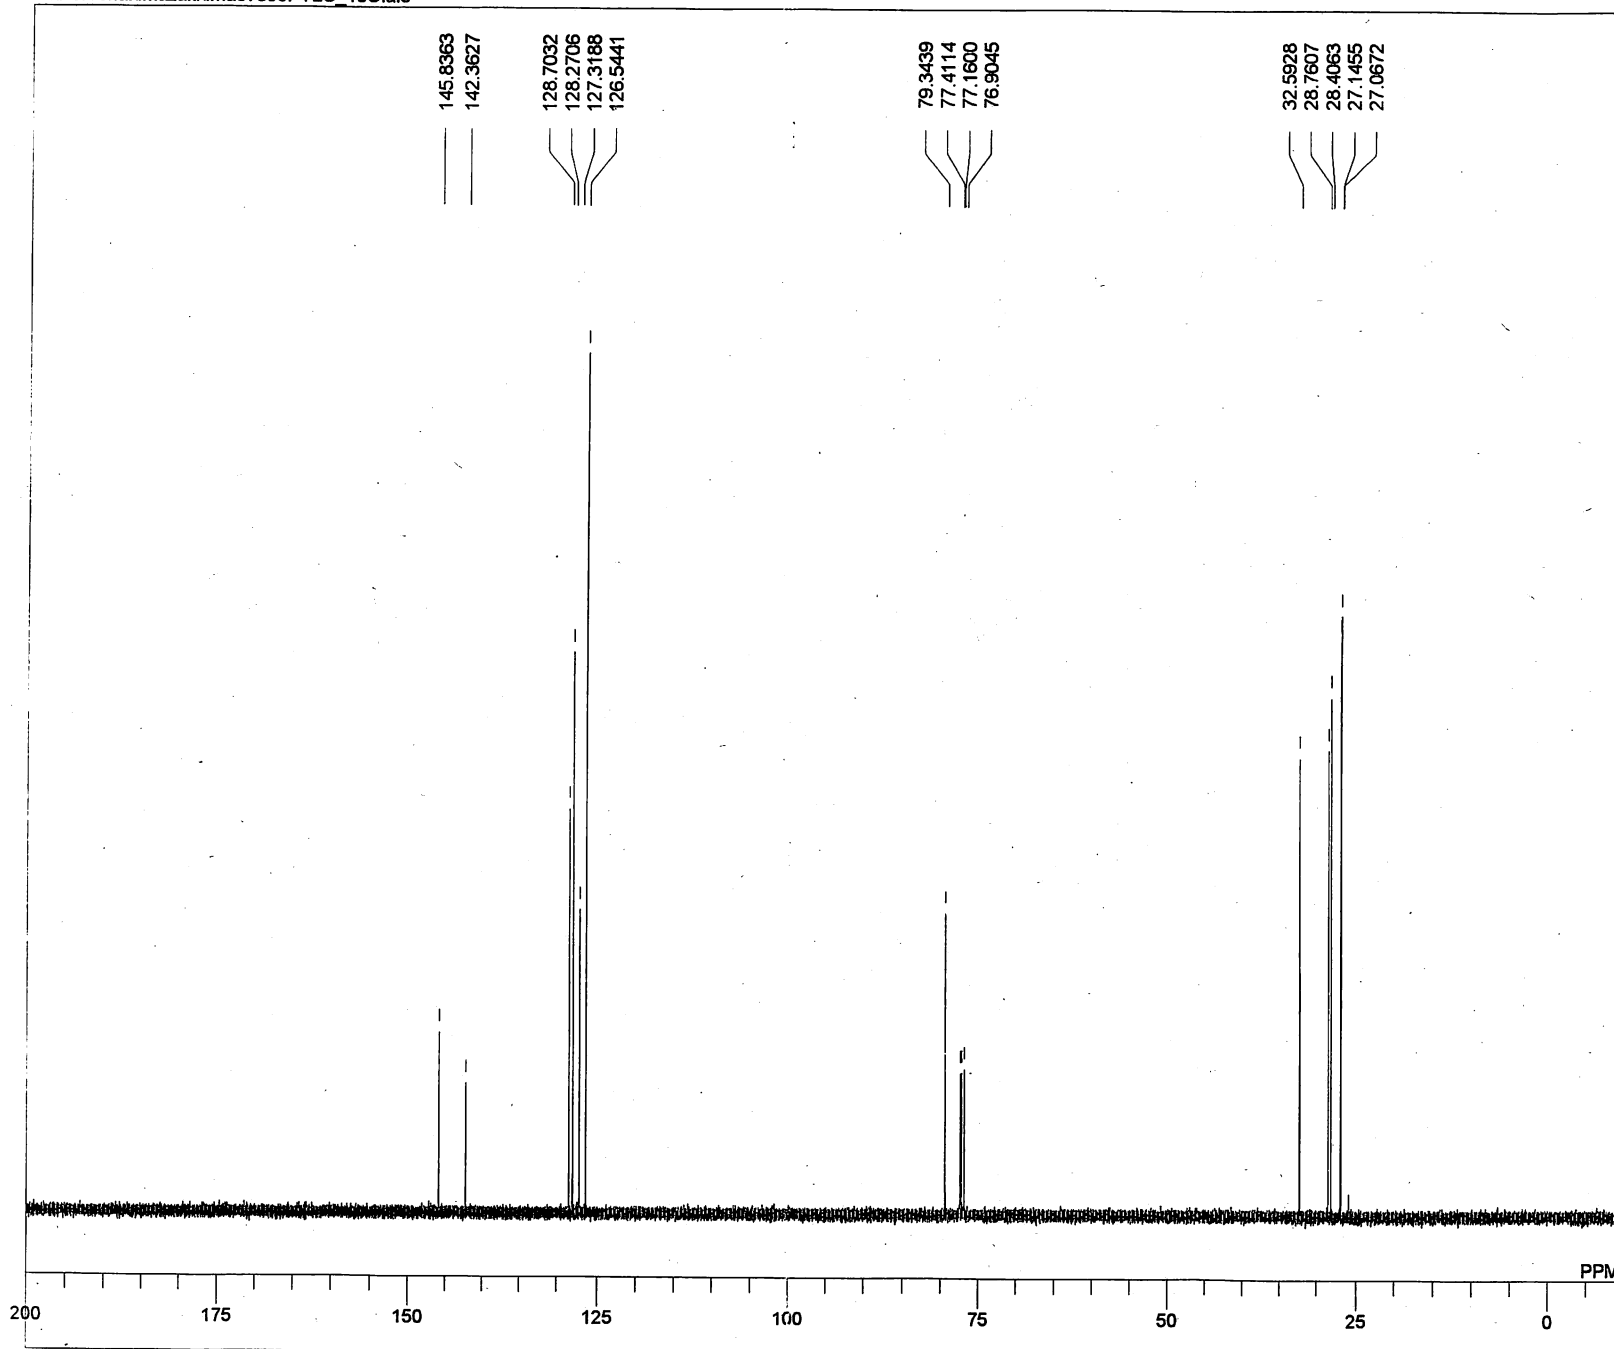

MENUF 13C  
OBNUC 13C  
OFR 125.40 MHz  
OBSET 0.00 KHz  
OBFIN 143041.00 Hz  
PW1 6.25 usec  
DEADT 10.00 usec  
PREDL 0.01000 msec  
IWT 1000.0000 msec  
POINT 65536  
SPO 65536  
TIMES 256  
DUMMY 2  
FREQU 33898.30 Hz  
FLT 16950 Hz  
DELAY 11.80 usec  
ACQTM 1.9333 sec  
PD 1.0670 sec  
ADBIT 16  
RGAIN 31  
BF 0.12 Hz  
T1 0.00  
T2 0.00  
T3 90.00  
T4 100.00  
EXMOD bcm  
EXPCM single pulse with bilevel decoupling  
IRNUC 1H  
IFR 499.10 MHz  
IRSET 0.00 KHz  
IRFIN 128250.00 Hz  
IRRPW 50 usec  
IRATN 511  
DFILE ima07095PTLC\_13C.als  
SF th5at  
LKSET 0.00 KHz  
LKFIN 26934.0 Hz  
LKLEV 200  
LGAIN 20  
LKPHS 353  
LKSIG 637  
CSPED 12 Hz  
FILDC  
FILDF  
SLVNT CDCL3  
DATIM Wed Dec 24 22:18:00 2008

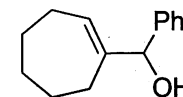

3
